# Supplementary material for: Synthesis of β-cyanoalkylsulfonylated vinyl selenides through a four-component reaction
Source: Royal Society of Chemistry journal article supplement (doi:10.1039/d1cc05690e), 2021-01-01

## Supporting Information

### Synthesis of $\beta$ -cyanoalkylsulfonated vinyl selenides through a four-component reaction

Fu-Sheng He,\* Yanfang Yao, Zhimei Tang, Yanjie Qiu, Wenlin Xie, and Jie Wu\*

#### Table of Contents

|                                                                  |     |
|------------------------------------------------------------------|-----|
| 1. General Information.....                                      | S2  |
| 2. General Experimental Procedure and Characterization Data..... | S2  |
| 3. General Procedure for the Synthesis of Alkynyl Sulfone.....   | S15 |
| 4. Radical Trapping Experiment.....                              | S16 |
| 5. X-Ray Single Crystal Diffraction Data.....                    | S17 |
| 6. Copies of $^1\text{H}$ and $^{13}\text{C}$ NMR Spectra.....   | S18 |

## 1. General Information

Unless otherwise stated, all commercial reagents were used as received. All solvents were dried and distilled according to standard procedures. Flash column chromatography was performed using silica gel (60-Å pore size, 32-63 μm, standard grade). Analytical thin-layer chromatography was performed using glass plates pre-coated with 0.25 mm 230-400 mesh silica gel impregnated with a fluorescent indicator (254 nm). Thin layer chromatography plates were visualized by exposure to ultraviolet light. X-ray single crystal diffraction data were recorded on Bruker D8 VENTURE. Nuclear magnetic resonance (NMR) spectra are recorded in parts per million from internal tetramethylsilane on the δ scale. <sup>1</sup>H and <sup>13</sup>C NMR spectra were recorded in CDCl<sub>3</sub> on a Bruker DRX-400 spectrometer operating at 400 MHz and 100 MHz, respectively. All chemical shift values are quoted in ppm and coupling constants quoted in Hz. High resolution mass spectrometry (HRMS) spectra were obtained on a micrOTOF II Instrument.

## 2. General Experimental Procedure and Characterization Data

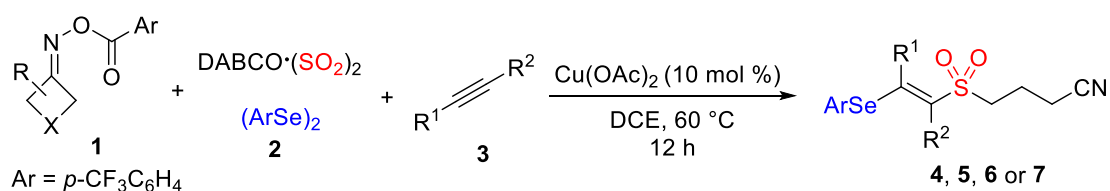

1,2-Dichloroethane (2.0 mL) was added to a sealed tube containing cycloketone oxime esters **1** (0.2 mmol), DABCO (SO<sub>2</sub>)<sub>2</sub> (0.2 mmol), diselenides **2** (0.2 mmol), alkynes **3** (0.3 mmol) and Cu(OAc)<sub>2</sub> (10 mol%) under a nitrogen atmosphere via a syringe. The resulting mixture was stirred at 60 °C in an oil bath for 12 hours. After completion of reaction as monitored by TLC analysis, the mixture was diluted with DCM and washed with saturated aqueous NaHCO<sub>3</sub> (10 mL), brine (10 mL), and dried over anhydrous Na<sub>2</sub>SO<sub>4</sub>. Subsequently, the solvent was concentrated under reduced pressure, and the residue was purified by column chromatography on silica gel (petroleum ether/ethyl acetate = 2:1) to give the corresponding products **4**, **5**, **6** or **7**.

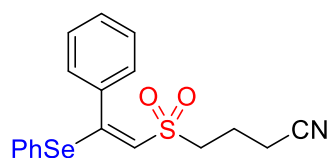

**(E)-4-((2-Phenyl-2-(phenylselanyl)vinyl)sulfonyl)butanenitrile (4a)**

Yellow solid, 70% yield;  $^1\text{H}$  NMR (400 MHz,  $\text{CDCl}_3$ )  $\delta$  7.67 (dd,  $J = 7.8, 1.6$  Hz, 2H), 7.52 – 7.40 (m, 8H), 5.88 (s, 1H), 2.73 (t,  $J = 7.2$  Hz, 2H), 2.38 (t,  $J = 7.1$  Hz, 2H), 2.17 – 1.84 (m, 2H);  $^{13}\text{C}$  NMR (100 MHz,  $\text{CDCl}_3$ )  $\delta$  160.3, 136.8, 134.3, 130.6, 130.5, 130.2, 128.4, 128.3, 126.6, 122.2, 118.2, 53.3, 18.8, 16.1; HRMS (ESI) calcd for  $\text{C}_{18}\text{H}_{17}\text{NO}_2\text{NaSSe}^+$  ( $\text{M}+\text{Na}^+$ ): 414.0043, found: 414.0048.

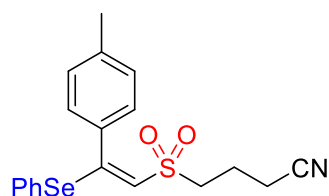

**(E)-4-((2-(Phenylselanyl)-2-(p-tolyl)vinyl)sulfonyl)butanenitrile (4b)**

Yellow solid, 74% yield;  $^1\text{H}$  NMR (400 MHz,  $\text{CDCl}_3$ )  $\delta$  7.69 – 7.64 (m, 2H), 7.51 – 7.42 (m, 3H), 7.39 (d,  $J = 8.1$  Hz, 2H), 7.23 (d,  $J = 7.9$  Hz, 2H), 5.84 (s, 1H), 2.73 (t,  $J = 7.2$  Hz, 2H), 2.54 – 2.26 (m, 5H), 2.00 – 1.90 (m, 2H);  $^{13}\text{C}$  NMR (100 MHz,  $\text{CDCl}_3$ )  $\delta$  160.5, 140.6, 136.7, 131.4, 130.5, 129.1, 128.3, 126.8, 121.9, 118.2, 53.2, 21.5, 18.8, 16.1; HRMS (ESI) calcd for  $\text{C}_{19}\text{H}_{19}\text{NO}_2\text{NaSSe}^+$  ( $\text{M}+\text{Na}^+$ ): 428.0199, found: 428.0207.

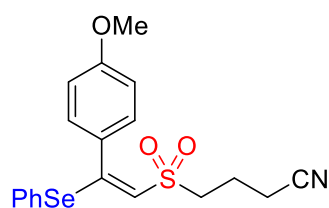

**(E)-4-((2-(4-Methoxyphenyl)-2-(phenylselanyl)vinyl)sulfonyl)butanenitrile (4c)**

Yellow solid, 68% yield;  $^1\text{H}$  NMR (400 MHz,  $\text{CDCl}_3$ )  $\delta$  7.68 – 7.63 (m, 2H), 7.52 – 7.42 (m, 5H), 7.00 – 6.89 (m, 2H), 5.85 (s, 1H), 3.83 (s, 3H), 2.72 (t,  $J = 7.2$  Hz, 2H), 2.40 (t,  $J = 7.1$  Hz, 2H), 2.01 – 1.89 (m, 2H);  $^{13}\text{C}$  NMR (100 MHz,  $\text{CDCl}_3$ )  $\delta$  161.2, 160.1, 136.6, 130.5, 130.4, 130.2, 127.0, 126.3, 121.7, 118.3, 113.9, 55.4, 53.0, 18.9, 16.1; HRMS (ESI) calcd for  $\text{C}_{19}\text{H}_{19}\text{NO}_3\text{NaSSe}^+$  ( $\text{M}+\text{Na}^+$ ): 444.0149, found: 444.0157.

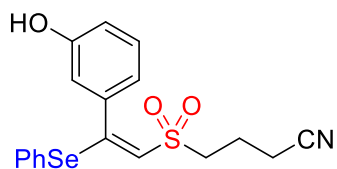

**(E)-4-((2-(3-Hydroxyphenyl)-2-(phenylselanyl)vinyl)sulfonyl)butanenitrile (4d)**

Yellow solid, 45% yield;  $^1\text{H}$  NMR (400 MHz,  $\text{CDCl}_3$ )  $\delta$  7.70 – 7.61 (m, 2H), 7.52 – 7.41 (m, 3H), 7.29 (d,  $J = 7.9$  Hz, 1H), 7.01 (d,  $J = 7.6$  Hz, 1H), 6.96 – 6.83 (m, 2H), 6.41 (s, 1H), 5.85 (s, 1H), 2.80 (t,  $J = 7.3$  Hz, 2H), 2.42 (t,  $J = 7.0$  Hz, 2H), 2.02 – 1.93 (m, 2H);  $^{13}\text{C}$  NMR (100 MHz,  $\text{CDCl}_3$ )  $\delta$  160.6, 155.9, 136.7, 135.4, 130.6, 130.5, 129.9, 126.5, 121.7, 120.3, 118.5, 117.7, 115.3, 53.3, 18.8, 16.1; HRMS (ESI) calcd for  $\text{C}_{18}\text{H}_{17}\text{NO}_3\text{NaSSe}^+$  ( $\text{M}+\text{Na}^+$ ): 429.9992, found: 429.9991.

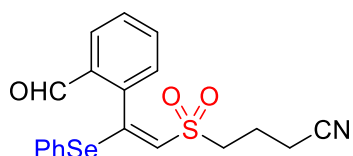

**(E)-4-((2-(2-Formylphenyl)-2-(phenylselanyl)vinyl)sulfonyl)butanenitrile (4e)**

Red brown solid, 50% yield;  $^1\text{H}$  NMR (400 MHz,  $\text{CDCl}_3$ )  $\delta$  10.16 (s, 1H), 7.91 (dd,  $J = 7.6, 1.2$  Hz, 1H), 7.70 – 7.65 (m, 2H), 7.63 (td,  $J = 7.5, 1.4$  Hz, 1H), 7.56 (td,  $J = 7.5, 1.2$  Hz, 1H), 7.52 – 7.42 (m, 3H), 7.35 (dd,  $J = 7.5, 0.9$  Hz, 1H), 6.08 (s, 1H), 2.90 – 2.78 (m, 2H), 2.45 – 2.38 (m, 2H), 2.05 – 1.93 (m, 2H);  $^{13}\text{C}$  NMR (100 MHz,  $\text{CDCl}_3$ )  $\delta$  190.8, 158.4, 136.8, 135.9, 133.4, 132.7, 131.2, 130.7, 130.5, 130.0, 129.5, 126.2, 122.8, 118.2, 53.4, 18.5, 16.1; HRMS (ESI) calcd for  $\text{C}_{19}\text{H}_{17}\text{NO}_3\text{NaSSe}^+$  ( $\text{M}+\text{Na}^+$ ): 441.9992, found: 442.0000.

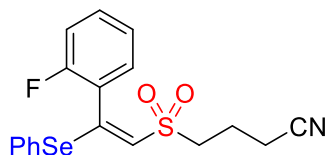

**(E)-4-((2-(2-Fluorophenyl)-2-(phenylselanyl)vinyl)sulfonyl)butanenitrile (4f)**

Yellow oil, 80% yield;  $^1\text{H}$  NMR (400 MHz,  $\text{CDCl}_3$ )  $\delta$  7.68 – 7.63 (m, 2H), 7.51 – 7.40 (m, 3H), 7.40 – 7.29 (m, 2H), 7.20 – 7.15 (m, 1H), 7.08 (t,  $J = 9.0$  Hz, 1H), 6.04 (s, 1H), 2.94 (t,  $J = 7.3$  Hz, 2H), 2.45 (t,  $J = 7.1$  Hz, 2H), 2.15 – 1.96 (m, 2H);  $^{13}\text{C}$  NMR (100 MHz,  $\text{CDCl}_3$ )  $\delta$  157.8 (d,  $J = 248.1$  Hz), 154.1, 136.8, 131.7 (d,  $J = 8.2$  Hz), 130.6,

130.4, 130.1 (d,  $J = 1.9$  Hz), 126.1, 124.1 (d,  $J = 3.5$  Hz), 123.2, 122.4 (d,  $J = 15.9$  Hz), 118.2, 115.7 (d,  $J = 21.3$  Hz), 53.1, 18.6, 16.2; HRMS (ESI) calcd for  $C_{18}H_{16}NO_2FNaSSe^+$  ( $M+Na^+$ ): 431.9949, found: 431.9958.

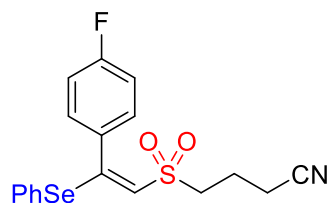

**(E)-4-((2-(4-Fluorophenyl)-2-(phenylselanyl)vinyl)sulfonyl)butanenitrile (4g)**

Yellow solid, 72% yield;  $^1H$  NMR (400 MHz,  $CDCl_3$ )  $\delta$  7.67 – 7.64 (m, 2H), 7.53 – 7.43 (m, 5H), 7.15 – 7.07 (m, 2H), 5.91 (s, 1H), 2.79 (t,  $J = 7.2$  Hz, 2H), 2.43 (t,  $J = 7.0$  Hz, 2H), 2.02 – 1.93 (m, 2H);  $^{13}C$  NMR (100 MHz,  $CDCl_3$ )  $\delta$  163.6 (d,  $J = 251.3$  Hz), 159.5, 136.7, 130.6 (d,  $J = 4.3$  Hz), 130.5, 130.5, 130.2 (d,  $J = 3.5$  Hz), 126.5, 122.3, 118.1, 115.6 (d,  $J = 22.0$  Hz), 53.3, 18.7, 16.1; HRMS (ESI) calcd for  $C_{18}H_{16}NO_2NaS-SeF^+$  ( $M+Na^+$ ): 431.9949, found: 431.9957.

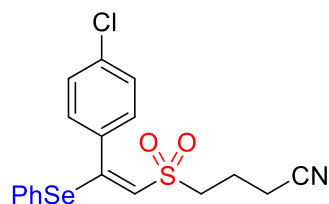

**(E)-4-((2-(4-Chlorophenyl)-2-(phenylselanyl)vinyl)sulfonyl)butanenitrile (4h)**

Yellow solid, 76% yield;  $^1H$  NMR (400 MHz,  $CDCl_3$ )  $\delta$  7.67 – 7.63 (m, 2H), 7.54 – 7.43 (m, 3H), 7.43 – 7.37 (m, 4H), 5.89 (s, 1H), 2.80 (t,  $J = 7.3$  Hz, 2H), 2.42 (t,  $J = 7.0$  Hz, 2H), 2.02 – 1.93 (m, 2H);  $^{13}C$  NMR (100 MHz,  $CDCl_3$ )  $\delta$  159.3, 136.7, 136.3, 132.8, 130.7, 130.6, 129.7, 128.7, 126.4, 122.3, 118.2, 53.4, 18.7, 16.1; HRMS (ESI) calcd for  $C_{18}H_{16}NO_2NaSClSe^+$  ( $M+Na^+$ ): 447.9653, found: 447.9656.

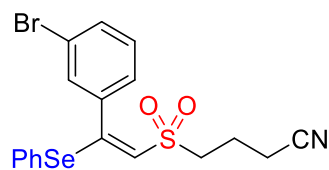

**(E)-4-((2-(3-Bromophenyl)-2-(phenylselanyl)vinyl)sulfonyl)butanenitrile (4i)**

Yellow solid, 52% yield;  $^1\text{H}$  NMR (400 MHz,  $\text{CDCl}_3$ )  $\delta$  7.68 – 7.63 (m, 2H), 7.59 (t,  $J = 1.7$  Hz, 1H), 7.56 – 7.44 (m, 4H), 7.38 (d,  $J = 7.8$  Hz, 1H), 7.29 (d,  $J = 7.9$  Hz, 1H), 5.88 (s, 1H), 2.82 (t,  $J = 7.2$  Hz, 2H), 2.43 (t,  $J = 7.0$  Hz, 2H), 2.12 – 1.87 (m, 2H);  $^{13}\text{C}$  NMR (100 MHz,  $\text{CDCl}_3$ )  $\delta$  158.6, 136.8, 136.3, 133.0, 130.9, 130.7, 130.6, 129.8, 127.0, 126.3, 122.4, 122.2, 118.2, 53.5, 18.7, 16.1; HRMS (ESI) calcd for  $\text{C}_{18}\text{H}_{16}\text{NO}_2\text{NaS- SeBr}^+$  ( $\text{M}+\text{Na}^+$ ): 491.9148, found: 491.9154.

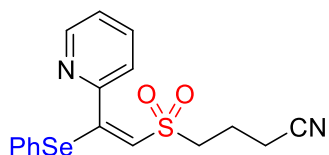

**(E)-4-((2-(Phenylselanyl)-2-(pyridin-2-yl)vinyl)sulfonyl)butanenitrile (4j)**

Brown solid, 54% yield;  $^1\text{H}$  NMR (400 MHz,  $\text{CDCl}_3$ )  $\delta$  8.70 – 8.63 (m, 1H), 7.79 – 7.73 (m, 1H), 7.70 – 7.67 (m, 2H), 7.58 (d,  $J = 7.8$  Hz, 1H), 7.53 – 7.43 (m, 3H), 7.35 – 7.30 (m, 1H), 5.95 (s, 1H), 3.23 (t,  $J = 7.2$  Hz, 2H), 2.49 (t,  $J = 7.1$  Hz, 2H), 2.14 – 2.05 (m, 2H);  $^{13}\text{C}$  NMR (100 MHz,  $\text{CDCl}_3$ )  $\delta$  159.9, 153.4, 149.4, 136.8, 136.5, 130.6, 130.5, 125.8, 124.5, 124.3, 122.9, 118.3, 54.6, 18.7, 16.2; HRMS (ESI) calcd for  $\text{C}_{17}\text{H}_{16}\text{N}_2\text{O}_2\text{NaSSe}^+$  ( $\text{M}+\text{Na}^+$ ): 414.9995, found: 415.0002.

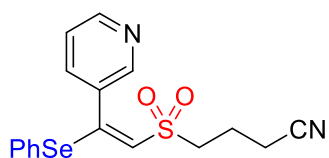

**(E)-4-((2-(Phenylselanyl)-2-(pyridin-3-yl)vinyl)sulfonyl)butanenitrile (4k)**

Yellow solid, 48% yield;  $^1\text{H}$  NMR (400 MHz,  $\text{CDCl}_3$ )  $\delta$  8.67 – 8.60 (m, 2H), 7.83 – 7.72 (m, 1H), 7.68 – 7.64 (m, 2H), 7.56 – 7.44 (m, 3H), 7.39 – 7.31 (m, 1H), 6.00 (s, 1H), 2.87 (t,  $J = 7.3$  Hz, 2H), 2.45 (t,  $J = 7.0$  Hz, 2H), 2.09 – 1.91 (m, 2H);  $^{13}\text{C}$  NMR (100 MHz,  $\text{CDCl}_3$ )  $\delta$  157.0, 150.8, 148.1, 136.7, 136.0, 130.8, 130.6, 126.1, 123.1, 122.9, 118.1, 53.7, 18.6, 16.1; HRMS (ESI) calcd for  $\text{C}_{17}\text{H}_{16}\text{N}_2\text{O}_2\text{NaSSe}^+$  ( $\text{M}+\text{Na}^+$ ): 414.9995, found: 415.0003.

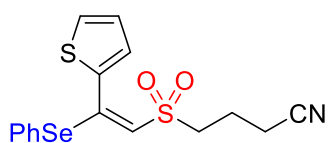

**(E)-4-((2-(Phenylselanyl)-2-(thiophen-2-yl)vinyl)sulfonyl)butanenitrile (4l)**

Yellow solid, 65% yield;  $^1\text{H}$  NMR (400 MHz,  $\text{CDCl}_3$ )  $\delta$  7.70 – 7.65 (m, 2H), 7.61 – 7.54 (m, 2H), 7.52 – 7.43 (m, 3H), 7.14 – 7.10 (m, 1H), 5.92 (s, 1H), 2.82 (t,  $J = 7.2$  Hz, 2H), 2.43 (t,  $J = 7.1$  Hz, 2H), 2.04 – 1.93 (m, 2H);  $^{13}\text{C}$  NMR (100 MHz,  $\text{CDCl}_3$ )  $\delta$  150.6, 136.5, 134.7, 131.5, 130.6, 130.5, 130.2, 128.1, 127.2, 123.0, 118.1, 52.4, 18.9, 16.2; HRMS (ESI) calcd for  $\text{C}_{16}\text{H}_{15}\text{NO}_2\text{NaS}_2\text{Se}^+$  ( $\text{M}+\text{Na}^+$ ): 419.9607, found: 419.9604.

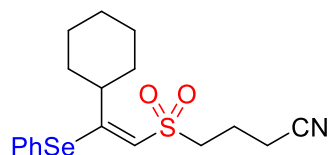

**(E)-4-((2-Cyclohexyl-2-(phenylselanyl)vinyl)sulfonyl)butanenitrile (4m)**

White solid, 31% yield;  $^1\text{H}$  NMR (400 MHz,  $\text{CDCl}_3$ )  $\delta$  7.61 – 7.54 (m, 2H), 7.51 – 7.38 (m, 3H), 5.46 (s, 1H), 2.98 (t,  $J = 7.2$  Hz, 2H), 2.55 (t,  $J = 7.0$  Hz, 2H), 2.16-2.03 (m, 2H), 1.87 (t,  $J = 13.7$  Hz, 4H), 1.75 (d,  $J = 12.8$  Hz, 1H), 1.67 – 1.54 (m, 3H), 1.49 – 1.36 (m, 2H), 1.31 – 1.18 (m, 1H);  $^{13}\text{C}$  NMR (100 MHz,  $\text{CDCl}_3$ )  $\delta$  172.6, 137.3, 130.4, 130.2, 125.4, 119.1, 118.2, 54.0, 42.1, 33.3, 25.9, 25.5, 18.8, 16.3; HRMS (ESI) calcd for  $\text{C}_{18}\text{H}_{23}\text{NO}_2\text{NaSSe}^+$  ( $\text{M}+\text{Na}^+$ ): 420.0512, found: 420.0515.

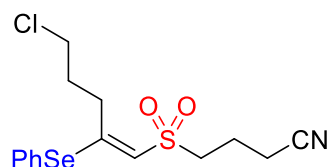

**(E)-4-((5-Chloro-2-(phenylselanyl)pent-1-en-1-yl)sulfonyl)butanenitrile (4n)**

Yellow oil, 69% yield;  $^1\text{H}$  NMR (400 MHz,  $\text{CDCl}_3$ )  $\delta$  7.63 – 7.59 (m, 2H), 7.52 – 7.43 (m, 3H), 5.67 (s, 1H), 3.63 (t,  $J = 6.4$  Hz, 2H), 3.03 (t,  $J = 8.0$  Hz, 4H), 2.56 (t,  $J = 7.0$  Hz, 2H), 2.24 – 2.16 (m, 2H), 2.15 – 2.07 (m, 1H);  $^{13}\text{C}$  NMR (100 MHz,  $\text{CDCl}_3$ )  $\delta$  163.6, 136.9, 130.5, 130.5, 125.3, 120.7, 118.2, 53.8, 44.0, 33.3, 31.0, 18.7, 16.3; HRMS (ESI) calcd for  $\text{C}_{15}\text{H}_{18}\text{NO}_2\text{NaSClSe}^+$  ( $\text{M}+\text{Na}^+$ ): 413.9810, found: 413.9809.

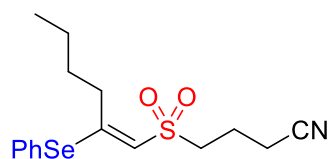

**(E)-4-((2-(Phenylselanyl)hex-1-en-1-yl)sulfonyl)butanenitrile (4o)**

Yellow oil, 72% yield;  $^1\text{H}$  NMR (400 MHz,  $\text{CDCl}_3$ )  $\delta$  7.63 – 7.58 (m, 2H), 7.52 – 7.41 (m, 3H), 5.61 (s, 1H), 3.00 (t,  $J = 7.3$  Hz, 2H), 2.93 – 2.82 (m, 2H), 2.55 (t,  $J = 7.0$  Hz, 2H), 2.16 – 2.00 (m, 2H), 1.78 – 1.64 (m, 2H), 1.57 – 1.36 (m, 2H), 0.95 (t,  $J = 7.3$  Hz, 3H);  $^{13}\text{C}$  NMR (100 MHz,  $\text{CDCl}_3$ )  $\delta$  165.8, 137.0, 130.4, 130.3, 125.6, 119.8, 118.2, 53.9, 33.2, 32.8, 22.6, 18.8, 16.3, 13.8; HRMS (ESI) calcd for  $\text{C}_{16}\text{H}_{21}\text{NO}_2\text{NaSSe}^+$  ( $\text{M}+\text{Na}^+$ ): 394.0356, found: 394.0353.

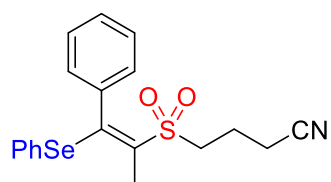

**(E)-4-((1-Phenyl-1-(phenylselanyl)prop-1-en-2-yl)sulfonyl)butanenitrile (4p)**

Yellow solid, 72% yield;  $^1\text{H}$  NMR (400 MHz,  $\text{CDCl}_3$ )  $\delta$  7.20 – 7.12 (m, 3H), 7.06 – 6.98 (m, 5H), 6.97 – 6.92 (m, 2H), 2.77 (t,  $J = 7.3$  Hz, 2H), 2.46 – 2.35 (m, 5H), 2.07 – 1.94 (m, 2H);  $^{13}\text{C}$  NMR (100 MHz,  $\text{CDCl}_3$ )  $\delta$  153.3, 137.1, 135.5, 130.5, 129.1, 129.0, 128.7, 128.2, 127.3, 126.8, 118.2, 52.6, 18.7, 18.6, 16.2; HRMS (ESI) calcd for  $\text{C}_{19}\text{H}_{19}\text{NO}_2\text{NaSSe}^+$  ( $\text{M}+\text{Na}^+$ ): 428.0199, found: 428.0202.

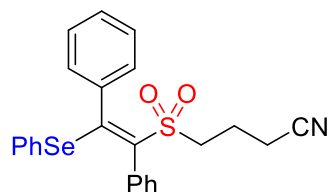

**(E)-4-((1,2-Diphenyl-2-(phenylselanyl)vinyl)sulfonyl)butanenitrile (4q)**

Yellow solid, 45% yield;  $^1\text{H}$  NMR (400 MHz,  $\text{CDCl}_3$ )  $\delta$  7.64 – 7.49 (m, 5H), 7.14 – 7.03 (m, 8H), 7.02 – 6.92 (m, 2H), 2.80 (t,  $J = 7.2$  Hz, 2H), 2.38 (t,  $J = 7.1$  Hz, 2H), 2.09 – 1.97 (m, 2H);  $^{13}\text{C}$  NMR (100 MHz,  $\text{CDCl}_3$ )  $\delta$  157.3, 137.2, 134.9, 134.7, 134.1, 130.6, 130.0, 129.4, 128.8, 128.6, 128.6, 128.2, 127.5, 127.3, 118.2, 52.0, 18.6, 16.1; HRMS (ESI) calcd for  $\text{C}_{24}\text{H}_{21}\text{NO}_2\text{NaSSe}^+$  ( $\text{M}+\text{Na}^+$ ): 490.0356, found: 490.0361.



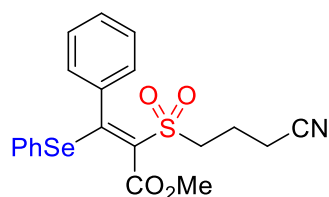

**Methyl (*E*)-2-((3-cyanopropyl)sulfonyl)-3-phenyl-3-(phenylselanyl)acrylate (4r)**

Yellow solid, 44% yield;  $^1\text{H}$  NMR (400 MHz,  $\text{CDCl}_3$ )  $\delta$  7.19 – 7.12 (m, 3H), 7.09 – 6.98 (m, 5H), 6.95 – 6.86 (m, 2H), 4.03 (s, 3H), 3.26 (t,  $J = 7.1$  Hz, 2H), 2.49 (t,  $J = 7.0$  Hz, 2H), 2.20 – 2.04 (m, 2H);  $^{13}\text{C}$  NMR (100 MHz,  $\text{CDCl}_3$ )  $\delta$  170.9, 163.9, 137.1, 134.4, 129.2, 128.7, 128.7, 127.8, 127.7, 127.6, 127.3, 118.3, 54.3, 53.4, 18.6, 16.2; HRMS (ESI) calcd for  $\text{C}_{20}\text{H}_{19}\text{NO}_4\text{NaSSe}^+$  ( $\text{M}+\text{Na}^+$ ): 472.0098, found: 472.0100.

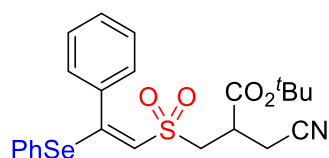

**tert-Butyl (*E*)-3-cyano-2-(((2-phenyl-2-(phenylselanyl)vinyl)sulfonyl)methyl)propanoate (5a)**

Yellow solid, 46% yield;  $^1\text{H}$  NMR (400 MHz,  $\text{CDCl}_3$ )  $\delta$  7.72 – 7.65 (m, 2H), 7.54 – 7.39 (m, 8H), 5.91 (s, 1H), 3.34 – 3.15 (m, 1H), 3.05 – 2.96 (m, 1H), 2.93 – 2.82 (m, 1H), 2.80-2.65 (m, 2H), 1.44 (s, 9H);  $^{13}\text{C}$  NMR (100 MHz,  $\text{CDCl}_3$ )  $\delta$  168.4, 161.4, 136.8, 134.2, 130.6, 130.5, 130.2, 128.4, 128.3, 126.5, 122.2, 116.6, 83.7, 54.5, 36.8, 27.8, 19.3; HRMS (ESI) calcd for  $\text{C}_{23}\text{H}_{25}\text{NO}_4\text{NaSSe}^+$  ( $\text{M}+\text{Na}^+$ ): 514.0567, found: 514.0571.

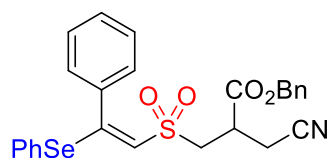

**Benzyl (*E*)-3-cyano-2-(((2-phenyl-2-(phenylselanyl)vinyl)sulfonyl)methyl)propanoate (5b)**

Yellow solid, 50% yield;  $^1\text{H}$  NMR (400 MHz,  $\text{CDCl}_3$ )  $\delta$  7.69 – 7.64 (m, 2H), 7.52 – 7.30 (m, 13H), 5.89 (s, 1H), 5.33 – 4.89 (m, 2H), 3.32 – 3.23 (m, 1H), 3.18 – 3.09 (m, 1H), 3.00 – 2.89 (m, 1H), 2.85-2.70 (m, 2H);  $^{13}\text{C}$  NMR (100 MHz,  $\text{CDCl}_3$ )  $\delta$  169.3,

161.9, 136.7, 134.6, 134.1, 130.6, 130.5, 130.2, 128.8, 128.8, 128.6, 128.4, 128.2, 126.5, 121.9, 116.5, 68.3, 54.3, 36.3, 19.1; HRMS (ESI) calcd for C<sub>26</sub>H<sub>23</sub>NO<sub>4</sub>NaS<sup>+</sup>Se<sup>+</sup> (M+Na<sup>+</sup>): 548.0411, found: 548.0414.

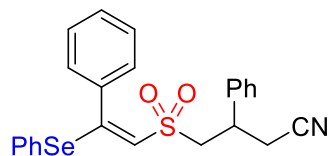

**(E)-3-Phenyl-4-((2-phenyl-2-(phenylselanyl)vinyl)sulfonyl)butanenitrile (5c)**

Yellow solid, 71% yield; <sup>1</sup>H NMR (400 MHz, CDCl<sub>3</sub>) δ 7.64 – 7.59 (m, 2H), 7.51 – 7.31 (m, 11H), 7.12 – 7.06 (m, 2H), 5.83 (s, 1H), 3.48 – 3.38 (m, 1H), 3.14 – 3.06 (m, 1H), 3.00 – 2.94 (m, 1H), 2.82–2.66 (m, 2H); <sup>13</sup>C NMR (100 MHz, CDCl<sub>3</sub>) δ 160.5, 139.3, 136.7, 134.3, 130.5, 130.5, 130.1, 129.3, 128.3, 128.3, 127.0, 126.5, 122.5, 117.3, 58.7, 36.2, 24.2; HRMS (ESI) calcd for C<sub>24</sub>H<sub>21</sub>NO<sub>2</sub>NaS<sup>+</sup>Se<sup>+</sup> (M+Na<sup>+</sup>): 490.0356, found: 490.0356.

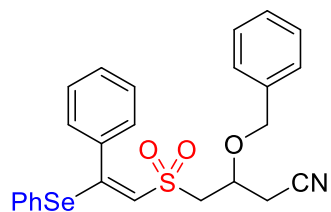

**(E)-3-(Benzyloxy)-4-((2-phenyl-2-(phenylselanyl)vinyl)sulfonyl)butanenitrile (5d)**

Yellow solid, 72% yield; <sup>1</sup>H NMR (400 MHz, CDCl<sub>3</sub>) δ 7.64 – 7.56 (m, 2H), 7.48 – 7.28 (m, 13H), 5.95 (s, 1H), 4.49 – 4.40 (m, 2H), 4.06 – 3.99 (m, 1H), 3.10 (dd, *J* = 14.3, 5.3 Hz, 1H), 2.87 (dd, *J* = 14.3, 6.7 Hz, 1H), 2.62 (dd, *J* = 17.0, 4.5 Hz, 1H), 2.46 (dd, *J* = 17.0, 5.3 Hz, 1H); <sup>13</sup>C NMR (100 MHz, CDCl<sub>3</sub>) δ 160.1, 136.7, 136.4, 134.4, 130.5, 130.4, 130.1, 128.7, 128.4, 128.0, 126.5, 123.2, 116.2, 72.2, 69.0, 58.3, 23.6; HRMS (ESI) calcd for C<sub>25</sub>H<sub>23</sub>NO<sub>3</sub>NaS<sup>+</sup>Se<sup>+</sup> (M+Na<sup>+</sup>): 520.0462, found: 520.0466.

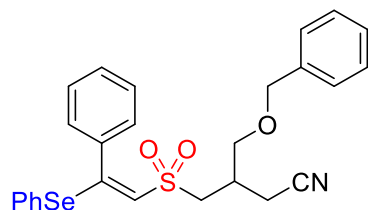

**(E)-4-(Benzyloxy)-3-(((2-phenyl-2-(phenylselanyl)vinyl)sulfonyl)methyl)butane-nitrile (5e)**

Yellow oil, 69% yield;  $^1\text{H}$  NMR (400 MHz,  $\text{CDCl}_3$ )  $\delta$  7.69 – 7.61 (m, 2H), 7.52 – 7.41 (m, 5H), 7.40 – 7.29 (m, 6H), 7.27 – 7.24 (m, 2H), 5.89 (s, 1H), 4.45 (s, 2H), 3.47 – 3.32 (m, 2H), 2.82 (dd,  $J = 14.3, 4.4$  Hz, 1H), 2.74 – 2.42 (m, 4H);  $^{13}\text{C}$  NMR (100 MHz,  $\text{CDCl}_3$ )  $\delta$  160.5, 137.4, 136.7, 134.3, 130.5, 130.5, 130.1, 128.6, 128.3, 128.0, 127.7, 126.6, 122.5, 117.4, 73.4, 70.0, 55.3, 31.2, 19.1; HRMS (ESI) calcd for  $\text{C}_{26}\text{H}_{25}\text{NO}_3\text{NaSSe}^+$  ( $\text{M}+\text{Na}^+$ ): 534.0618, found: 534.0624.

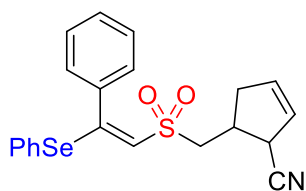

**(E)-5-(((2-Phenyl-2-(phenylselanyl)vinyl)sulfonyl)methyl)cyclopent-2-ene-1-carbonitrile (5f)**

White solid, 54% yield;  $^1\text{H}$  NMR (400 MHz,  $\text{CDCl}_3$ )  $\delta$  7.69 – 7.65 (m, 2H), 7.52 – 7.40 (m, 8H), 5.81 (s, 1H), 5.76 – 5.69 (m, 1H), 5.56 – 5.49 (m, 1H), 3.40 – 3.30 (m, 1H), 3.09 – 2.98 (m, 1H), 2.65 – 2.58 (m, 2H), 2.57 – 2.51 (m, 1H), 2.39 – 2.31 (m, 1H);  $^{13}\text{C}$  NMR (100 MHz,  $\text{CDCl}_3$ )  $\delta$  160.8, 136.8, 134.5, 131.0, 130.5, 130.5, 130.2, 129.7, 128.4, 128.2, 126.8, 120.1, 117.2, 65.6, 42.7, 34.6, 23.2; HRMS (ESI) calcd for  $\text{C}_{21}\text{H}_{19}\text{NO}_2\text{NaSSe}^+$  ( $\text{M}+\text{Na}^+$ ): 452.0199, found: 452.0201.

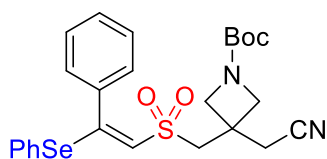

***tert*-Butyl (E)-3-(cyanomethyl)-3-(((2-phenyl-2-(phenylselanyl)vinyl)sulfonyl)methyl)-azetidine-1-carboxylate (5g)**

Yellow solid, 55% yield;  $^1\text{H}$  NMR (400 MHz,  $\text{CDCl}_3$ )  $\delta$  7.71 – 7.66 (m, 2H), 7.54 – 7.42 (m, 8H), 5.90 (s, 1H), 3.74 (d,  $J = 9.4$  Hz, 2H), 3.67 (d,  $J = 9.4$  Hz, 2H), 3.09 (s, 2H), 2.86 (s, 2H), 1.42 (s, 9H);  $^{13}\text{C}$  NMR (100 MHz,  $\text{CDCl}_3$ )  $\delta$  161.5, 155.8, 136.8, 134.1, 130.7, 130.6, 130.4, 128.5, 128.3, 126.3, 123.4, 116.5, 80.4, 59.2, 58.3, 33.4,

28.3, 25.6; HRMS (ESI) calcd for C<sub>25</sub>H<sub>28</sub>N<sub>2</sub>O<sub>4</sub>NaSSe<sup>+</sup> (M+Na<sup>+</sup>): 555.0833, found: 555.0836.

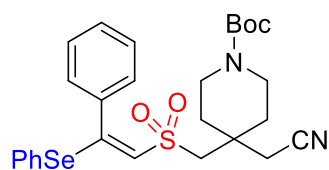

**tert-Butyl (E)-4-(cyanomethyl)-4-(((2-phenyl-2-(phenylselanyl)vinyl)sulfonyl)methyl)pi-peridine-1-carboxylate (5h)**

Yellow solid, 65% yield; <sup>1</sup>H NMR (400 MHz, CDCl<sub>3</sub>) δ 7.70 – 7.65 (m, 2H), 7.51 – 7.41 (m, 8H), 5.95 (s, 1H), 3.51 (d, *J* = 12.2 Hz, 2H), 2.98 – 2.82 (m, 4H), 2.67 (s, 2H), 1.77 – 1.59 (m, 3H), 1.55 – 1.38 (m, 10H); <sup>13</sup>C NMR (100 MHz, CDCl<sub>3</sub>) δ 160.0, 154.6, 136.8, 134.4, 130.6, 130.5, 130.1, 128.4, 128.4, 126.4, 124.8, 116.9, 80.0, 57.7, 35.7, 34.3, 28.4, 27.1; HRMS (ESI) calcd for C<sub>27</sub>H<sub>32</sub>N<sub>2</sub>O<sub>4</sub>NaSSe<sup>+</sup> (M+Na<sup>+</sup>): 583.1146, found: 583.1153.

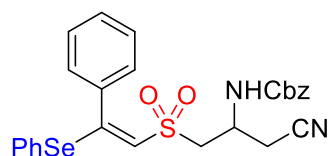

**Benzyl (E)-(1-cyano-3-(((2-phenyl-2-(phenylselanyl)vinyl)sulfonyl)propan-2-yl)carbamate (5i)**

Yellow oil, 47% yield; <sup>1</sup>H NMR (400 MHz, CDCl<sub>3</sub>) δ 7.68 – 7.63 (m, 2H), 7.48 – 7.37 (m, 8H), 7.36 – 7.30 (m, 5H), 5.88 (s, 1H), 5.49 (d, *J* = 7.2 Hz, 1H), 5.09 (s, 2H), 4.18 (dd, *J* = 13.6, 6.2 Hz, 1H), 3.06 (dd, *J* = 14.3, 5.9 Hz, 1H), 2.90 (dd, *J* = 14.3, 5.8 Hz, 1H), 2.72 (d, *J* = 5.9 Hz, 2H); <sup>13</sup>C NMR (100 MHz, CDCl<sub>3</sub>) δ 161.9, 155.2, 136.8, 135.7, 134.1, 130.6, 130.5, 130.3, 128.7, 128.4, 128.3, 128.2, 126.5, 122.1, 116.4, 67.3, 56.7, 44.3, 22.8; HRMS (ESI) calcd for C<sub>26</sub>H<sub>24</sub>N<sub>2</sub>O<sub>4</sub>NaSSe<sup>+</sup> (M+Na<sup>+</sup>): 563.0520, found: 563.0524.

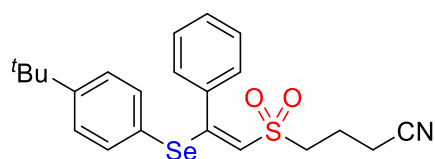

**(E)-4-((2-((4-(tert-Butyl)phenyl)selanyl)-2-phenylvinyl)sulfonyl)butanenitrile (5j)**

Yellow solid, 36% yield;  $^1\text{H}$  NMR (400 MHz,  $\text{CDCl}_3$ )  $\delta$  7.61 – 7.56 (m, 2H), 7.51 – 7.46 (m, 4H), 7.45 – 7.41 (m, 3H), 5.92 (s, 1H), 2.74 (t,  $J = 7.2$  Hz, 2H), 2.40 (t,  $J = 7.1$  Hz, 2H), 2.03 – 1.91 (m, 2H), 1.36 (s, 9H);  $^{13}\text{C}$  NMR (100 MHz,  $\text{CDCl}_3$ )  $\delta$  160.9, 154.1, 136.5, 134.4, 130.1, 128.4, 128.2, 127.7, 123.1, 121.9, 118.2, 53.3, 35.0, 31.2, 18.8, 16.1; HRMS (ESI) calcd for  $\text{C}_{22}\text{H}_{25}\text{NO}_2\text{NaSSe}^+$  ( $\text{M}+\text{Na}^+$ ): 470.0669, found: 470.0671.

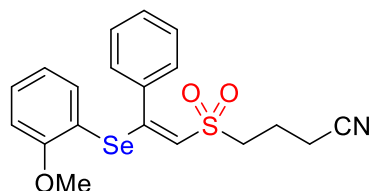

**(E)-4-((2-((2-Methoxyphenyl)selanyl)-2-phenylvinyl)sulfonyl)butanenitrile (5k)**

Yellow solid, 57% yield;  $^1\text{H}$  NMR (400 MHz,  $\text{CDCl}_3$ )  $\delta$  7.66 – 7.60 (m, 1H), 7.54 – 7.45 (m, 3H), 7.44 – 7.37 (m, 3H), 7.05 – 6.97 (m, 2H), 5.86 (s, 1H), 3.92 (s, 3H), 2.71 (t,  $J = 7.2$  Hz, 2H), 2.38 (t,  $J = 7.1$  Hz, 2H), 2.01 – 1.92 (m, 2H);  $^{13}\text{C}$  NMR (100 MHz,  $\text{CDCl}_3$ )  $\delta$  159.3, 159.0, 138.5, 134.4, 132.9, 130.1, 128.5, 128.3, 122.2, 121.4, 118.2, 115.6, 111.9, 56.2, 53.3, 18.9, 16.1; HRMS (ESI) calcd for  $\text{C}_{19}\text{H}_{19}\text{NO}_3\text{NaSSe}^+$  ( $\text{M}+\text{Na}^+$ ): 444.0149, found: 444.0150.

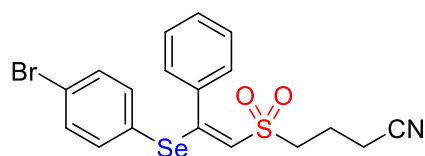

**(E)-4-((2-((4-Bromophenyl)selanyl)-2-phenylvinyl)sulfonyl)butanenitrile (5l)**

Brown solid, 43% yield;  $^1\text{H}$  NMR (400 MHz,  $\text{CDCl}_3$ )  $\delta$  7.61 – 7.55 (m, 2H), 7.54 – 7.49 (m, 2H), 7.48 – 7.41 (m, 5H), 5.93 (s, 1H), 2.76 (t,  $J = 7.2$  Hz, 2H), 2.41 (t,  $J = 7.0$  Hz, 2H), 2.07 – 1.83 (m, 2H);  $^{13}\text{C}$  NMR (100 MHz,  $\text{CDCl}_3$ )  $\delta$  159.5, 138.2, 134.0, 133.7, 130.3, 128.5, 128.3, 125.5, 125.2, 122.7, 118.2, 53.3, 18.7, 16.1; HRMS (ESI) calcd for  $\text{C}_{18}\text{H}_{16}\text{NO}_2\text{NaSSeBr}^+$  ( $\text{M}+\text{Na}^+$ ): 491.9148, found: 491.9149.

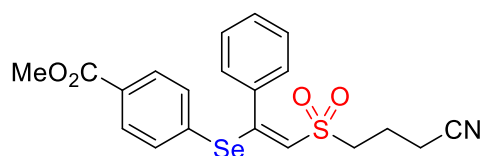

**Methyl (E)-4-((2-((3-cyanopropyl)sulfonyl)-1-phenylvinyl)selanyl)benzoate (5m)**

Yellow solid, 57% yield;  $^1\text{H}$  NMR (400 MHz,  $\text{CDCl}_3$ )  $\delta$  8.07 (d,  $J = 8.4$  Hz, 2H), 7.74 – 7.70 (m, 2H), 7.49 – 7.44 (m, 2H), 7.44 – 7.39 (m, 3H), 6.00 (s, 1H), 3.95 (s, 3H), 2.76 (t,  $J = 7.2$  Hz, 2H), 2.41 (t,  $J = 7.0$  Hz, 2H), 2.02 – 1.92 (m, 2H);  $^{13}\text{C}$  NMR (100 MHz,  $\text{CDCl}_3$ )  $\delta$  166.1, 158.9, 136.449, 134.0, 132.1, 131.8, 131.2, 130.4, 128.5, 128.4, 123.1, 118.1, 53.2, 52.5, 18.7, 16.1; HRMS (ESI) calcd for  $\text{C}_{20}\text{H}_{19}\text{NO}_4\text{NaSSeBr}^+$  ( $\text{M}+\text{Na}^+$ ): 472.0098, found: 472.0105.

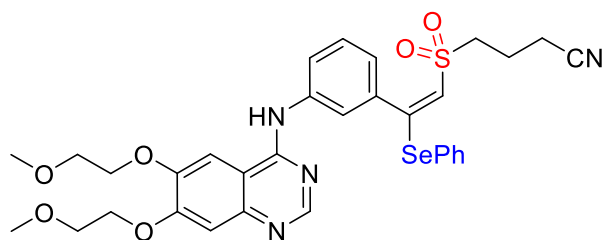

**(*E*)-4-((2-(3-((6,7-Bis(2-methoxyethoxy)quinazolin-4-yl)amino)phenyl)-2-(phenylselanyl)vinyl)sulfonyl)butanenitrile (6)**

Yellow solid, 68% yield;  $^1\text{H}$  NMR (400 MHz,  $\text{CDCl}_3$ )  $\delta$  8.30 (s, 1H), 8.06 – 7.78 (m, 2H), 7.69 – 7.60 (m, 3H), 7.53 – 7.38 (m, 5H), 7.22 (d,  $J = 7.5$  Hz, 2H), 5.85 (s, 1H), 4.22 (d,  $J = 21.3$  Hz, 4H), 3.81 (d,  $J = 11.7$  Hz, 4H), 3.49 – 3.40 (m, 6H), 2.89 (t,  $J = 7.3$  Hz, 2H), 2.47 (t,  $J = 6.7$  Hz, 2H), 2.09 – 1.88 (m, 2H);  $^{13}\text{C}$  NMR (100 MHz,  $\text{CDCl}_3$ )  $\delta$  161.0, 154.3, 149.0, 139.0, 138.9, 136.7, 134.9, 130.6, 130.6, 129.1, 128.9, 127.7, 126.5, 125.2, 124.2, 124.1, 122.6, 122.5, 121.8, 121.0, 118.9, 70.8, 70.4, 68.8, 68.4, 59.3, 59.2, 53.5, 19.0, 16.2; HRMS (ESI) calcd for  $\text{C}_{32}\text{H}_{35}\text{N}_4\text{O}_6\text{SSe}^+$  ( $\text{M}+\text{H}^+$ ): 683.1443, found: 683.1445.

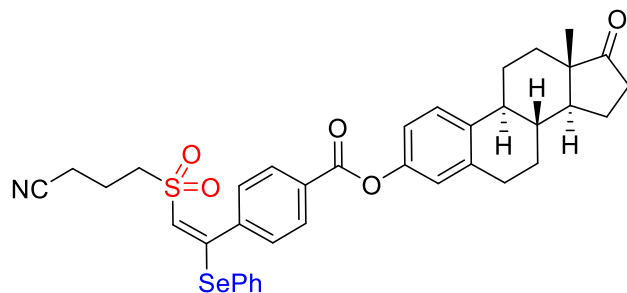

**(8*R*,9*S*,13*S*,14*S*)-13-Methyl-17-oxo-7,8,9,11,12,13,14,15,16,17-decahydro-6*H*-cyclopenta[*a*]phenanthren-3-yl 4-((*E*)-2-((3-cyanopropyl)sulfonyl)-1-(phenylselanyl)vinyl)benzoate (7)**

Yellow solid, 55% yield;  $^1\text{H}$  NMR (400 MHz,  $\text{CDCl}_3$ )  $\delta$  8.23 (d,  $J = 8.3$  Hz, 2H), 7.68 (d,  $J = 6.5$  Hz, 2H), 7.57 (d,  $J = 8.3$  Hz, 2H), 7.54 – 7.45 (m, 3H), 7.34 (d,  $J = 8.6$  Hz, 1H), 7.02 – 6.92 (m, 2H), 5.94 (s, 1H), 3.01 – 2.91 (m, 2H), 2.86 (t,  $J = 7.2$  Hz, 2H), 2.58 – 2.40 (m, 4H), 2.37 – 2.28 (m, 1H), 2.21 – 2.12 (m, 1H), 2.11 – 1.95 (m, 5H), 1.70 – 1.55 (m, 4H), 1.52 – 1.41 (m, 2H), 0.93 (s, 3H);  $^{13}\text{C}$  NMR (100 MHz,  $\text{CDCl}_3$ )  $\delta$  164.6, 159.3, 148.7, 139.6, 138.2, 137.6, 136.7, 130.9, 130.8, 130.6, 130.0, 128.5, 126.5, 126.1, 122.3, 121.6, 118.8, 118.1, 53.6, 50.4, 48.0, 44.2, 38.0, 35.9, 31.6, 29.4, 26.3, 25.8, 21.6, 18.7, 16.1, 13.8; HRMS (ESI) calcd for  $\text{C}_{37}\text{H}_{37}\text{NO}_5\text{NaSSe}^+$  ( $\text{M}+\text{Na}^+$ ): 710.1455, found: 710.1459.

### 3. General Procedure for the Synthesis of Alkynyl Sulfone

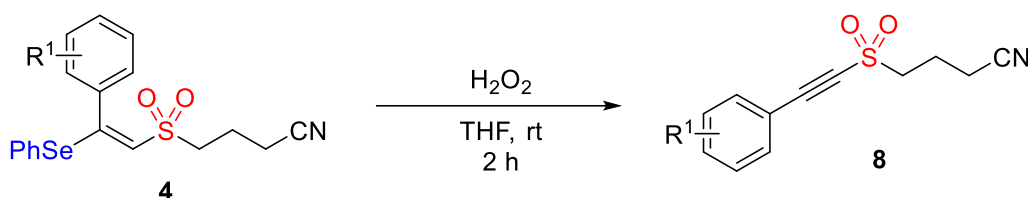

Tetrahydrofuran (4.0 mL) was added to a sealed round bottomed flask containing  $\beta$ -selenovinyl sulfone **4** (0.1 mmol) under air atmosphere *via* a syringe and H<sub>2</sub>O<sub>2</sub> aqueous solution (30 wt%, 2.0 mL) was added into the solution slowly. The resulting mixture was stirred at room temperature for 2 hours. After completion of reaction as monitored by TLC analysis, the mixture was diluted with chloroform (10 mL) and washed with water (10 mL), brine (10 mL), and dried over anhydrous Na<sub>2</sub>SO<sub>4</sub>. Subsequently, the solvent was concentrated under reduced pressure, and the residue was purified by column chromatography on silica gel (petroleum ether/ethyl acetate = 4:1) to give the corresponding product **8**.

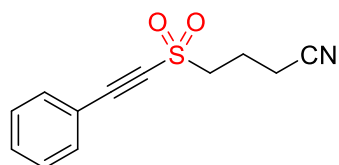

#### 4-((Phenylethynyl)sulfonyl)butanenitrile (**8a**)

Yellow oil, 57% yield;  $^1\text{H}$  NMR (400 MHz,  $\text{CDCl}_3$ )  $\delta$  7.65 – 7.59 (m, 2H), 7.55 (t,  $J = 7.5$  Hz, 1H), 7.44 (t,  $J = 7.6$  Hz, 2H), 3.47 (t,  $J = 7.2$  Hz, 2H), 2.69 (t,  $J = 7.1$  Hz, 2H), 2.51 – 2.25 (m, 2H);  $^{13}\text{C}$  NMR (100 MHz,  $\text{CDCl}_3$ )  $\delta$  133.0, 132.1, 128.9, 118.0, 117.1,

93.6, 82.7, 56.3, 19.6 16.1; HRMS (ESI) calcd for C<sub>12</sub>H<sub>11</sub>NO<sub>2</sub>NaS<sup>+</sup> (M+Na<sup>+</sup>): 256.0408, found: 256.0414.

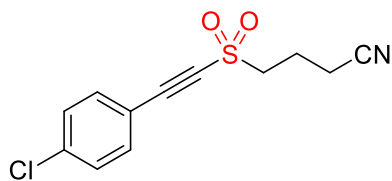

#### 4-(((4-Chlorophenyl)ethynyl)sulfonyl)butanenitrile (**8b**)

Yellow solid, 72% yield; <sup>1</sup>H NMR (400 MHz, CDCl<sub>3</sub>) δ 7.56 (d, *J* = 8.5 Hz, 2H), 7.43 (d, *J* = 8.4 Hz, 2H), 3.47 (t, *J* = 7.2 Hz, 2H), 2.69 (t, *J* = 7.0 Hz, 2H), 2.46 – 2.22 (m, 2H); <sup>13</sup>C NMR (100 MHz, CDCl<sub>3</sub>) δ 138.8, 134.2, 129.5, 118.0, 115.6, 92.2, 83.6, 56.3, 19.5, 16.0; HRMS (ESI) calcd for C<sub>12</sub>H<sub>10</sub>NO<sub>2</sub>NaSCl<sup>+</sup> (M+Na<sup>+</sup>): 290.0018, found: 290.0024.

#### 4. Radical Trapping Experiment

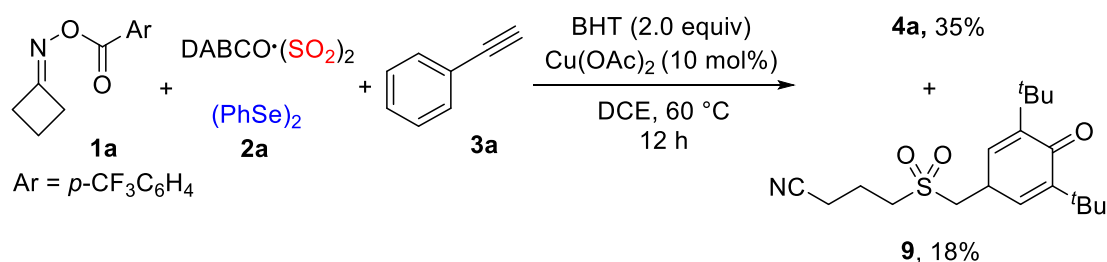

To a solution of cycloketone oxime ester **1a** (0.2 mmol), DABCO (SO<sub>2</sub>)<sub>2</sub> (0.2 mmol), diphenyl diselenide **2a** (0.2 mmol), phenylacetylene **3a** (0.3 mmol) and Cu(OAc)<sub>2</sub> (10 mol%) in 1,2-dichloroethane (2.0 mL) was added BHT (0.4 mmol, 2.0 equiv) under a nitrogen atmosphere. The resulting mixture was stirred at 60 °C in an oil bath for 12 hours. After completion of reaction as monitored by TLC analysis, the mixture was diluted with DCM and washed with saturated aqueous NaHCO<sub>3</sub> (10 mL), brine (10 mL), and dried over anhydrous Na<sub>2</sub>SO<sub>4</sub>. Subsequently, the solvent was concentrated under reduced pressure, and the residue was purified by column chromatography on silica gel (petroleum ether/ethyl acetate = 4:1) to give the corresponding products **4a** and **9** in 35% and 18% yields, respectively.

#### 4-(((3,5-Di-*tert*-butyl-4-hydroxybenzyl)sulfonyl)butanenitrile (**9**)



Light yellow solid, 18% yield;  $^1\text{H}$  NMR (400 MHz,  $\text{CDCl}_3$ )  $\delta$  6.66 (s, 2H), 2.86 (t,  $J = 7.1$  Hz, 2H), 2.57 (t,  $J = 7.0$  Hz, 2H), 2.19 – 2.11 (m, 2H), 1.71 (s, 2H), 1.26 (s, 18H);  $^{13}\text{C}$  NMR (100 MHz,  $\text{CDCl}_3$ )  $\delta$  184.2, 152.3, 135.1, 117.7, 65.4, 44.2, 35.6, 29.1, 18.2, 18.1, 16.4; HRMS (ESI) calcd for  $\text{C}_{19}\text{H}_{29}\text{NO}_3\text{NaS}^+$  ( $\text{M}+\text{Na}^+$ ): 374.1766, found: 374.1767.

## 5. X-Ray Single Crystal Diffraction Data

The crystals of compound **4i** were grown in a mixed solution of  $\text{CH}_2\text{Cl}_2$  and petroleum ether as the solution slowly volatilized. X-ray single crystal diffraction data were recorded on Bruker D8 VENTURE. This crystal structure has been deposited at the Cambridge Crystallographic Data Centre (CCDC 2102437).

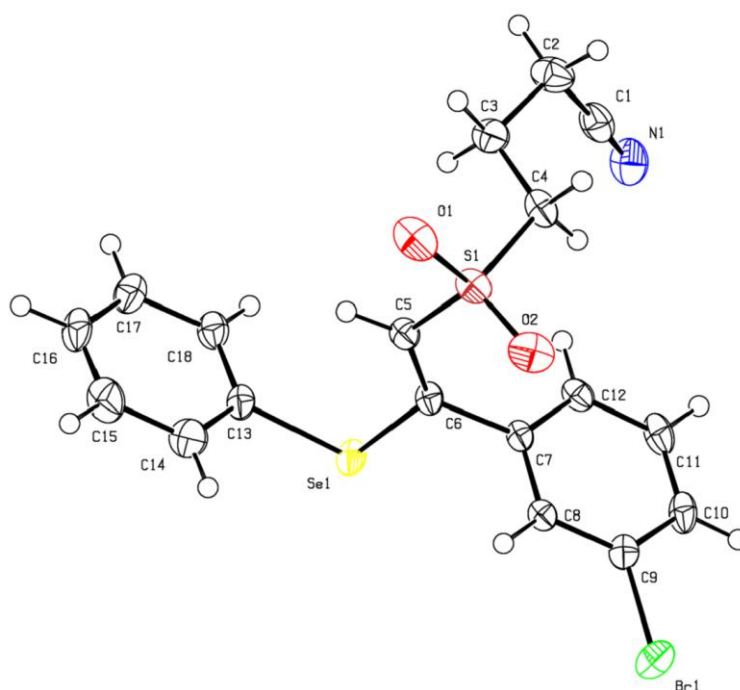

**Figure S1.** X-ray structure of **4i** (displacement ellipsoids are drawn at the 30% probability level).

**Table S1.** Crystal data and structure refinement for **4i**.

|                     |                                                     |
|---------------------|-----------------------------------------------------|
| Identification code | <b>4i</b>                                           |
| Empirical formula   | $\text{C}_{18}\text{H}_{16}\text{BrNO}_2\text{SSe}$ |
| Formula weight      | 469.25                                              |
| Temperature         | 173(2) K                                            |
| Wavelength          | 1.34138 Å                                           |

|                                   |                                             |                  |
|-----------------------------------|---------------------------------------------|------------------|
| Crystal system                    | Monoclinic                                  |                  |
| Space group                       | P2 <sub>1</sub> /c                          |                  |
| Unit cell dimensions              | a = 10.3416(9) Å                            | a = 90 °         |
|                                   | b = 18.4062(16) Å                           | b = 112.267(3) ° |
|                                   | c = 10.3029(9) Å                            | g = 90 °         |
| Volume                            | 1814.9(3) Å <sup>3</sup>                    |                  |
| Z                                 | 4                                           |                  |
| Density (calculated)              | 1.717 Mg/m <sup>3</sup>                     |                  |
| Absorption coefficient            | 4.329 mm <sup>-1</sup>                      |                  |
| F(000)                            | 928                                         |                  |
| Crystal size                      | 0.100 x 0.080 x 0.030 mm <sup>3</sup>       |                  |
| Theta range for data collection   | 4.019 to 59.490 °                           |                  |
| Index ranges                      | -11<=h<=13, -17<=k<=23, -13<=l<=13          |                  |
| Reflections collected             | 15494                                       |                  |
| Independent reflections           | 3975 [R(int) = 0.0744]                      |                  |
| Completeness to theta = 53.594 °  | 98.6 %                                      |                  |
| Absorption correction             | Semi-empirical from equivalents             |                  |
| Max. and min. transmission        | 0.752 and 0.314                             |                  |
| Refinement method                 | Full-matrix least-squares on F <sup>2</sup> |                  |
| Data / restraints / parameters    | 3975 / 0 / 217                              |                  |
| Goodness-of-fit on F <sup>2</sup> | 1.042                                       |                  |
| Final R indices [I>2sigma(I)]     | R1 = 0.0474, wR2 = 0.1178                   |                  |
| R indices (all data)              | R1 = 0.0525, wR2 = 0.1231                   |                  |
| Extinction coefficient            | n/a                                         |                  |
| Largest diff. peak and hole       | 0.903 and -0.836 e.Å <sup>-3</sup>          |                  |

## 6. Copies of $^1\text{H}$ and $^{13}\text{C}$ NMR Spectra

$^1\text{H}$  NMR spectrum of compound **4a** (400 MHz,  $\text{CDCl}_3$ )

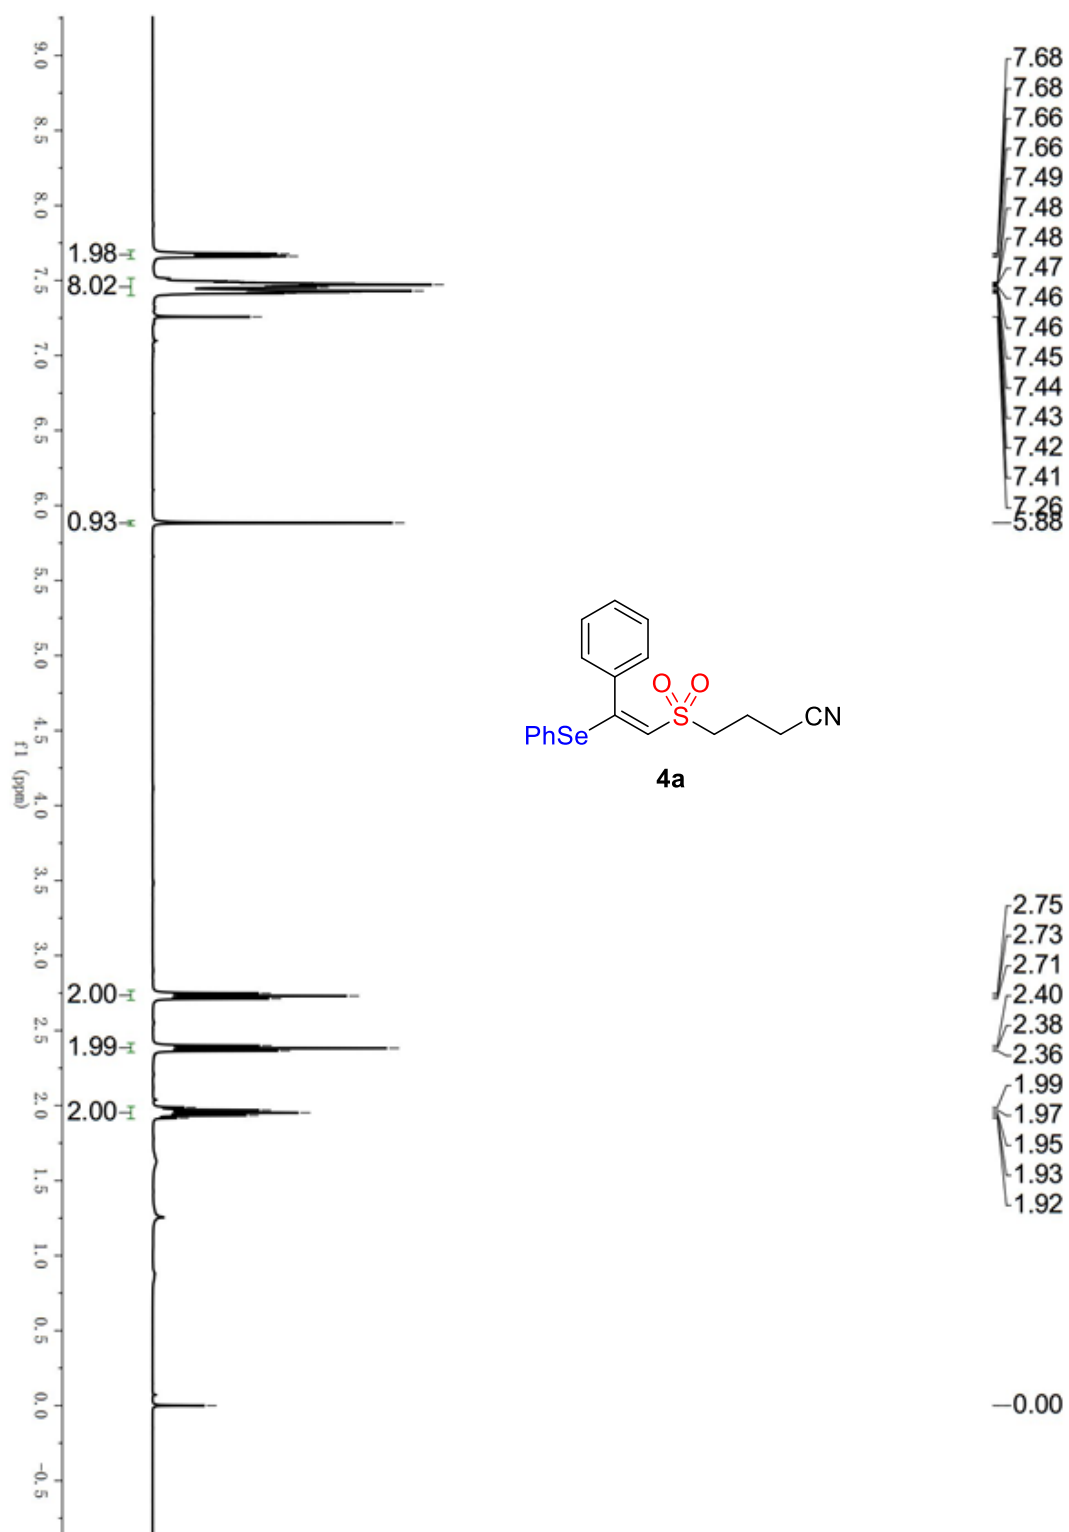

$^{13}\text{C}$  NMR spectrum of compound **4a** (100 MHz,  $\text{CDCl}_3$ )

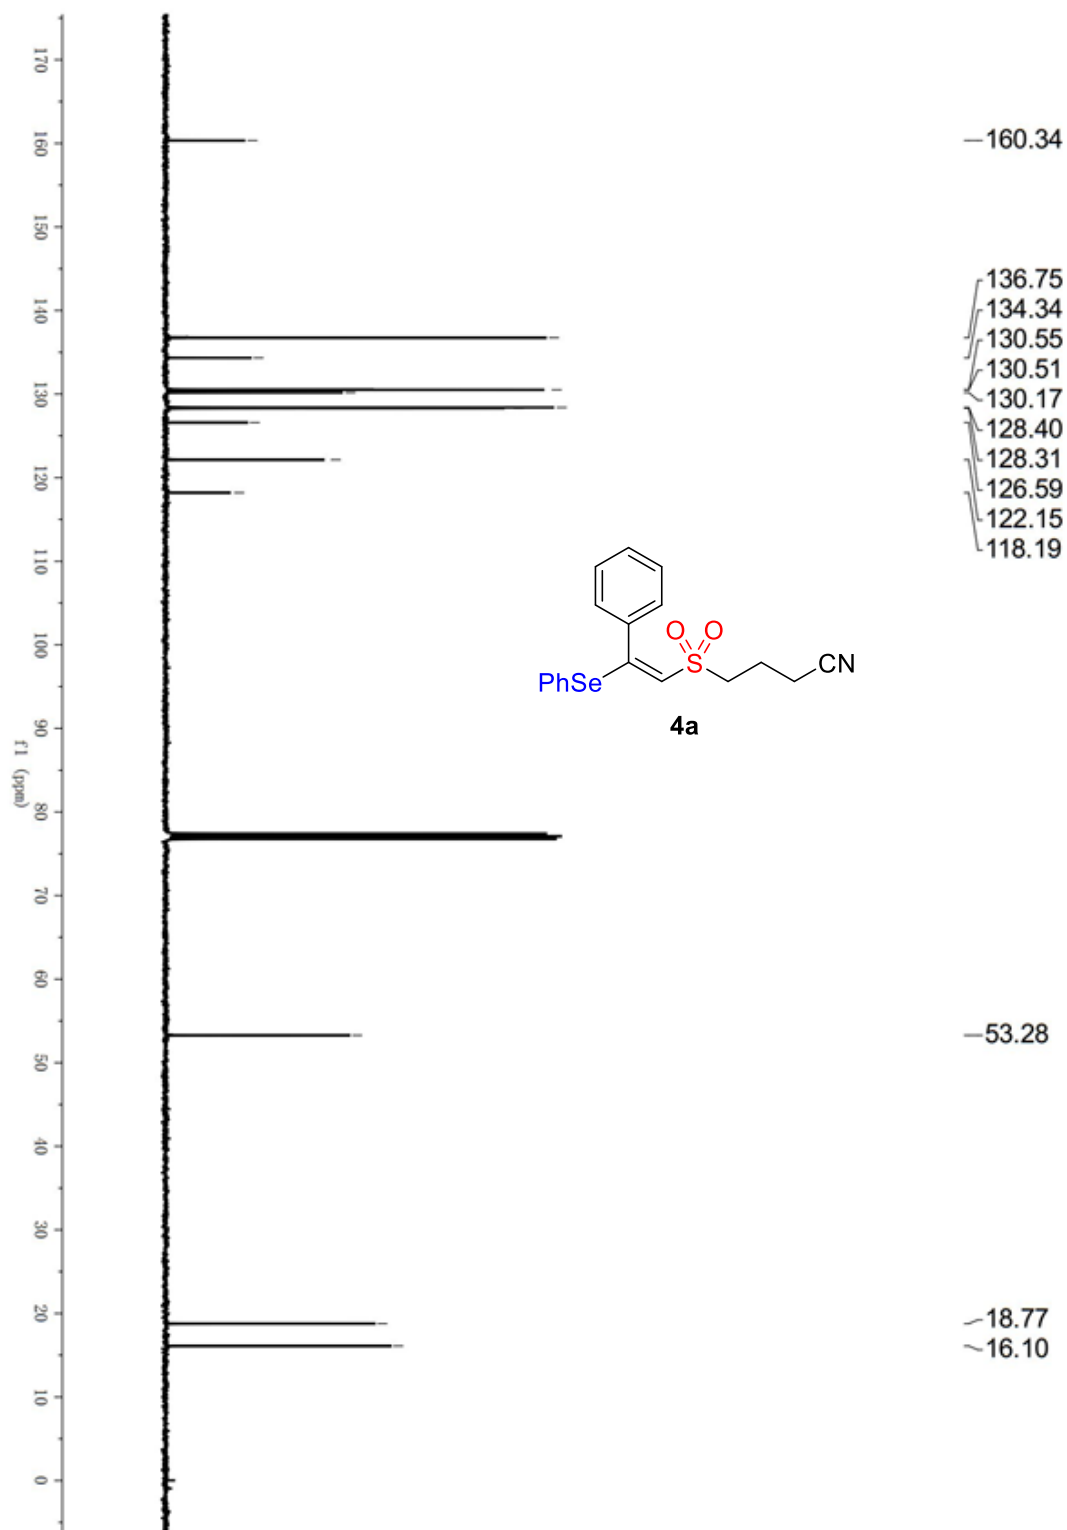

$^1\text{H}$  NMR spectrum of compound **4b** (400 MHz,  $\text{CDCl}_3$ )

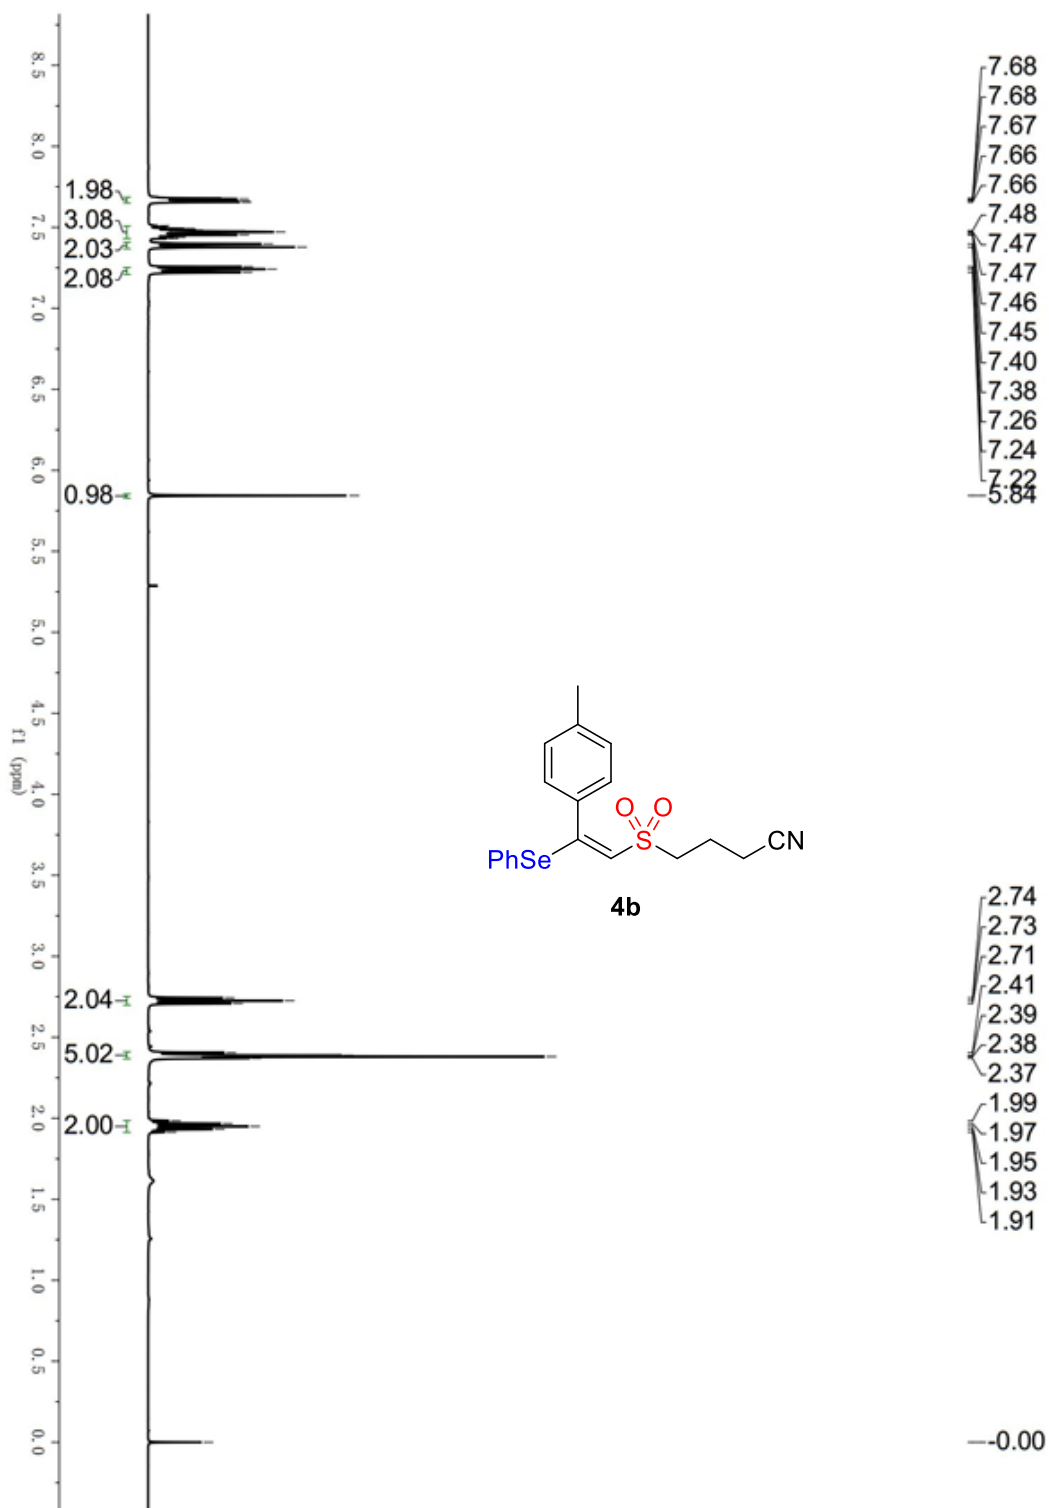

$^{13}\text{C}$  NMR spectrum of compound **4b** (100 MHz,  $\text{CDCl}_3$ )

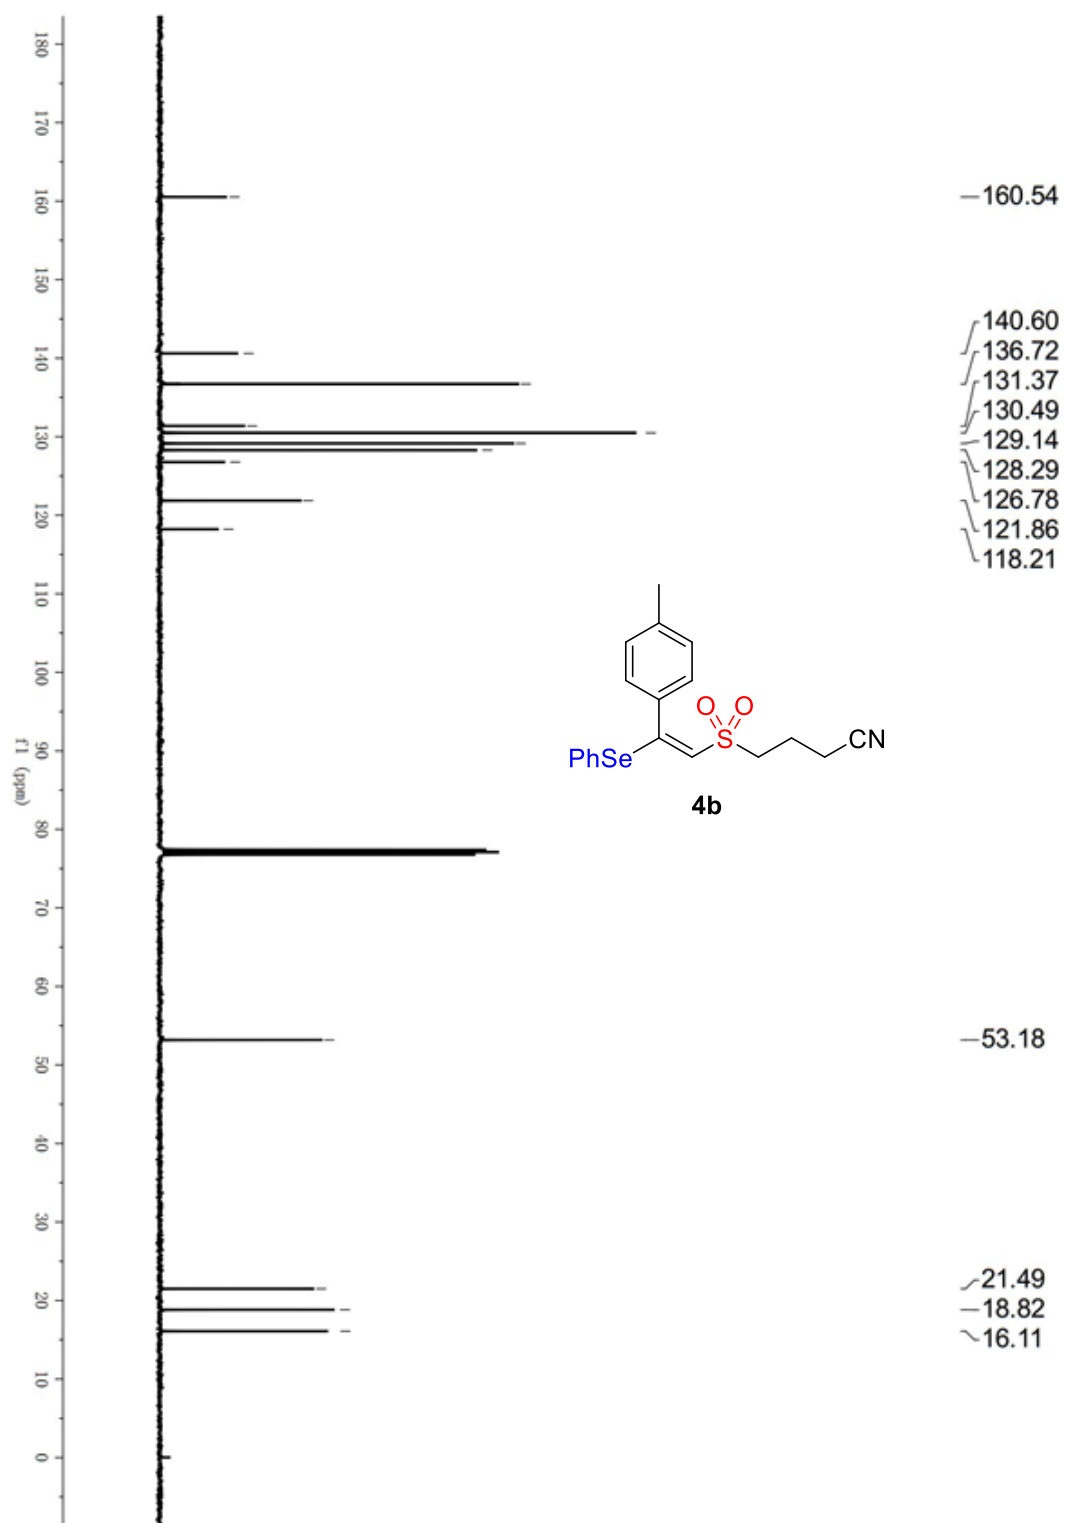

$^1\text{H}$  NMR spectrum of compound **4c** (400 MHz,  $\text{CDCl}_3$ )

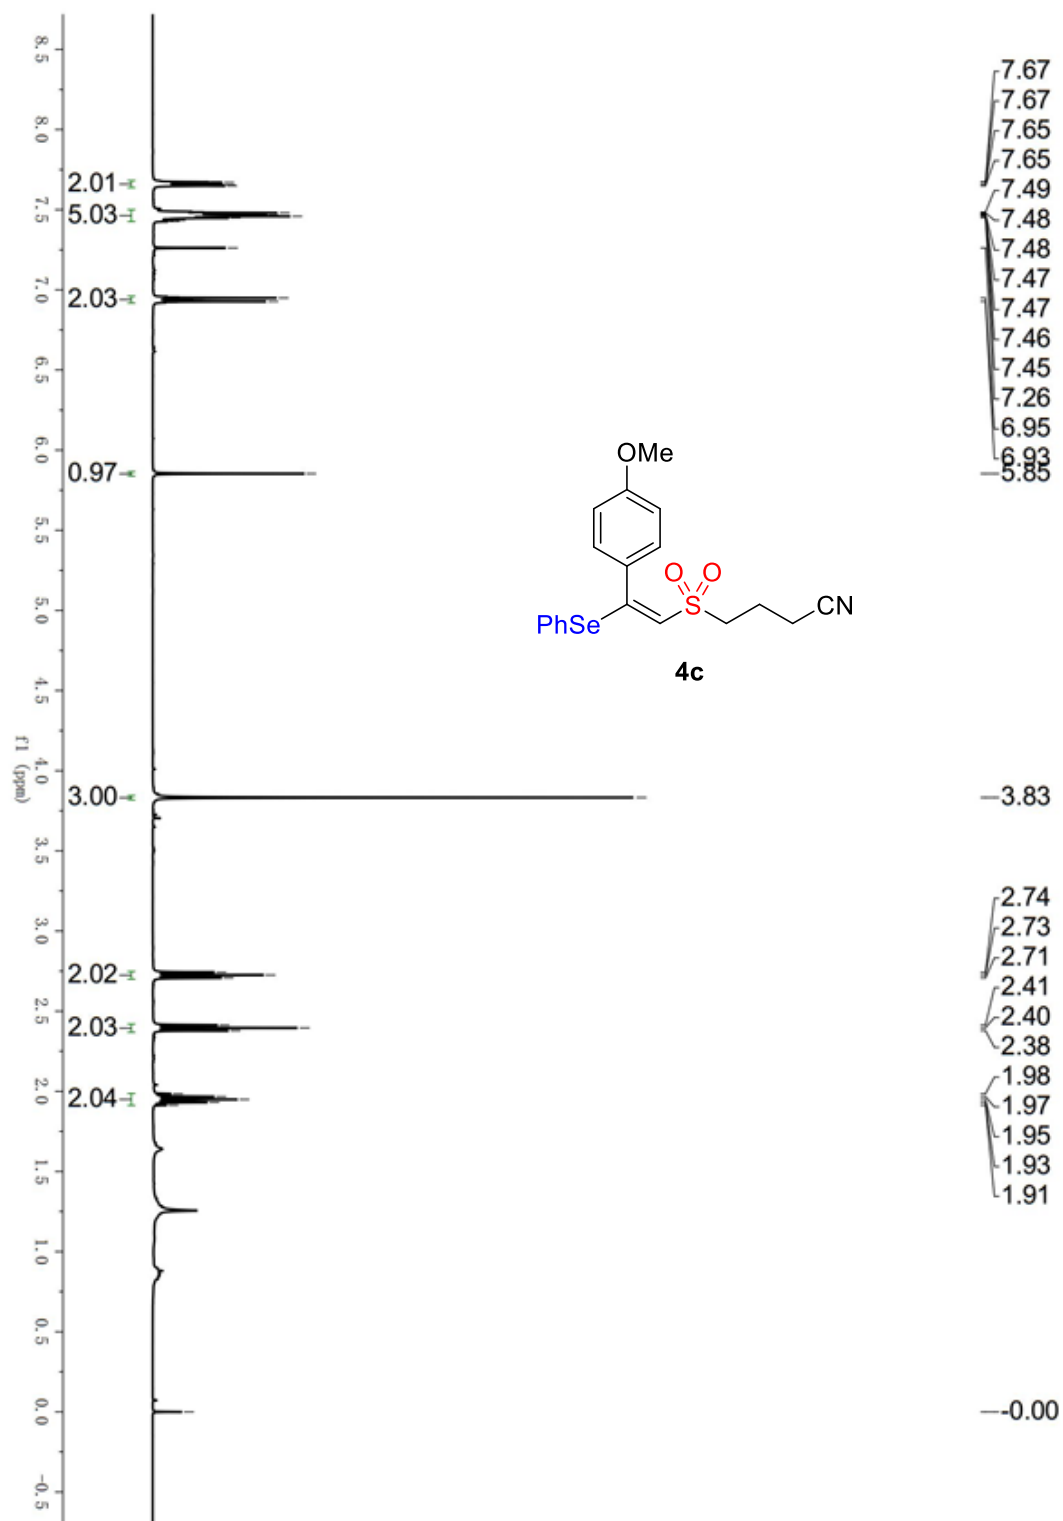

$^{13}\text{C}$  NMR spectrum of compound **4c** (100 MHz,  $\text{CDCl}_3$ )

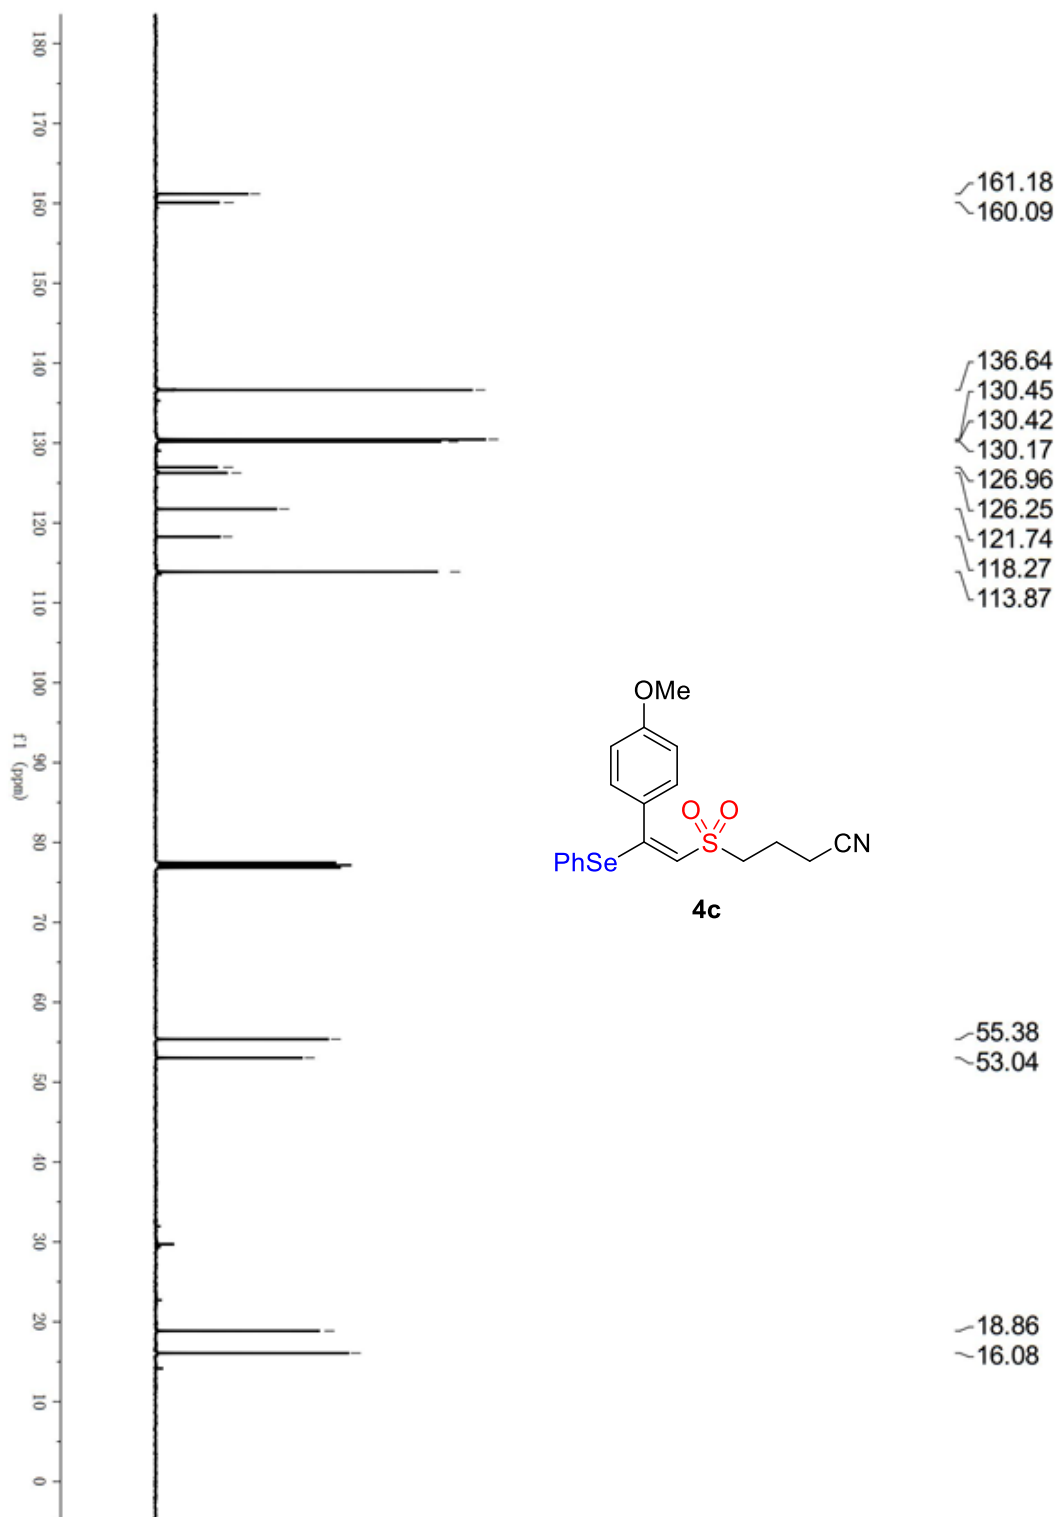



$^1\text{H}$  NMR spectrum of compound **4d** (400 MHz,  $\text{CDCl}_3$ )

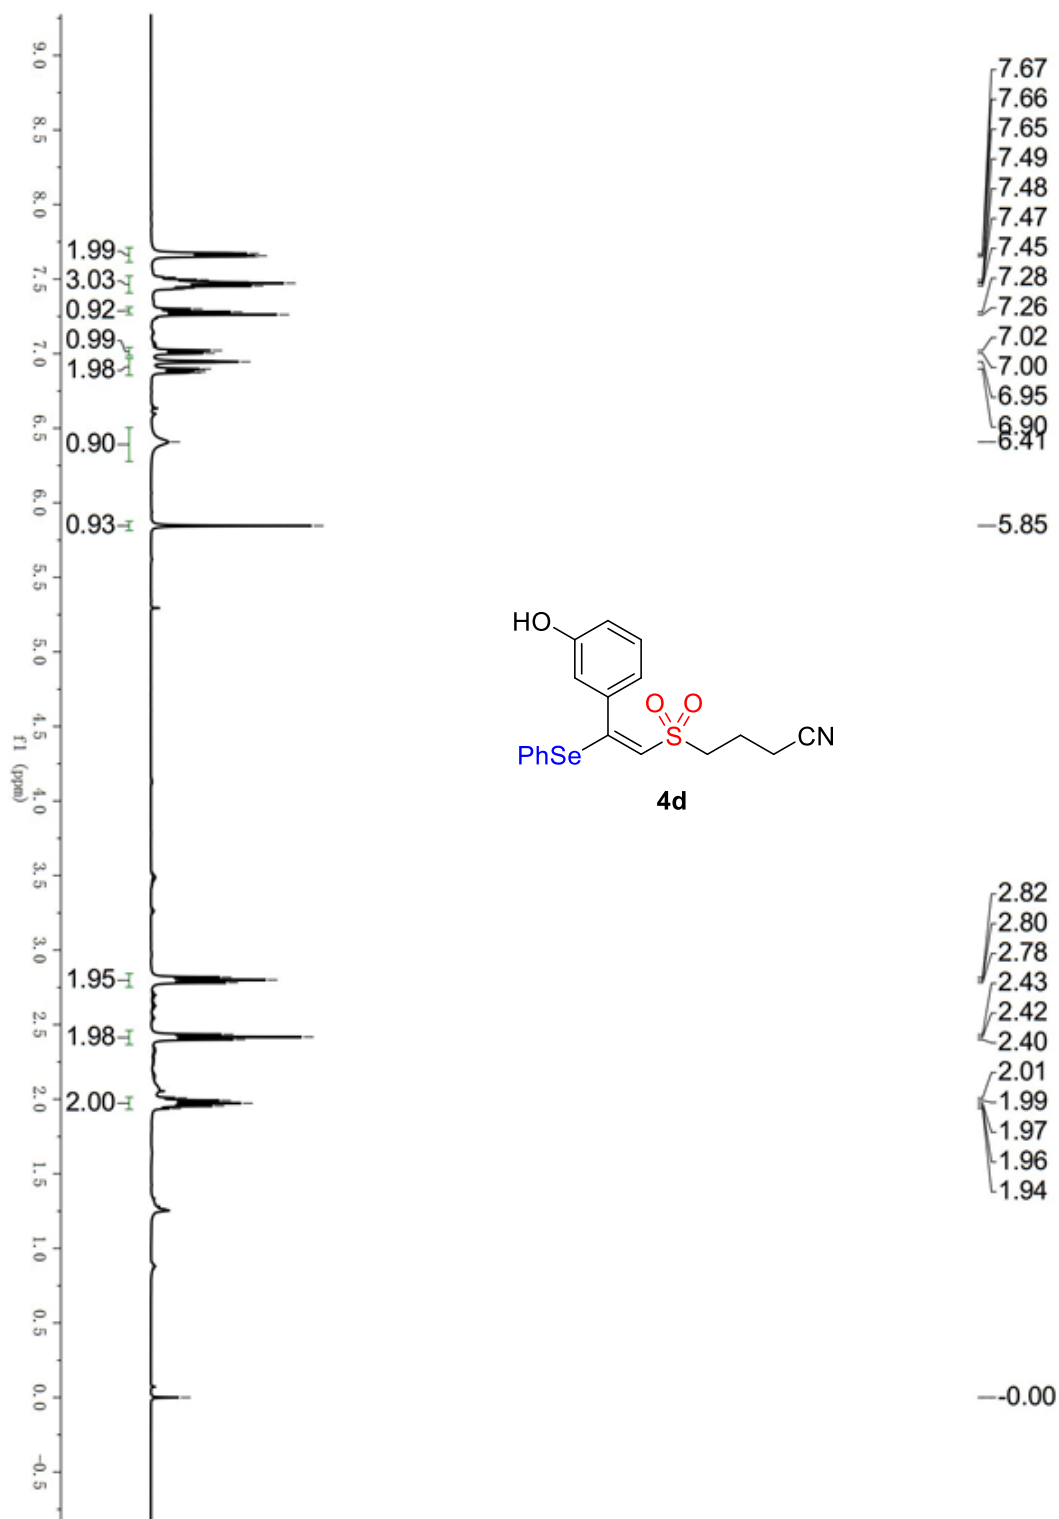

$^{13}\text{C}$  NMR spectrum of compound **4d** (100 MHz,  $\text{CDCl}_3$ )

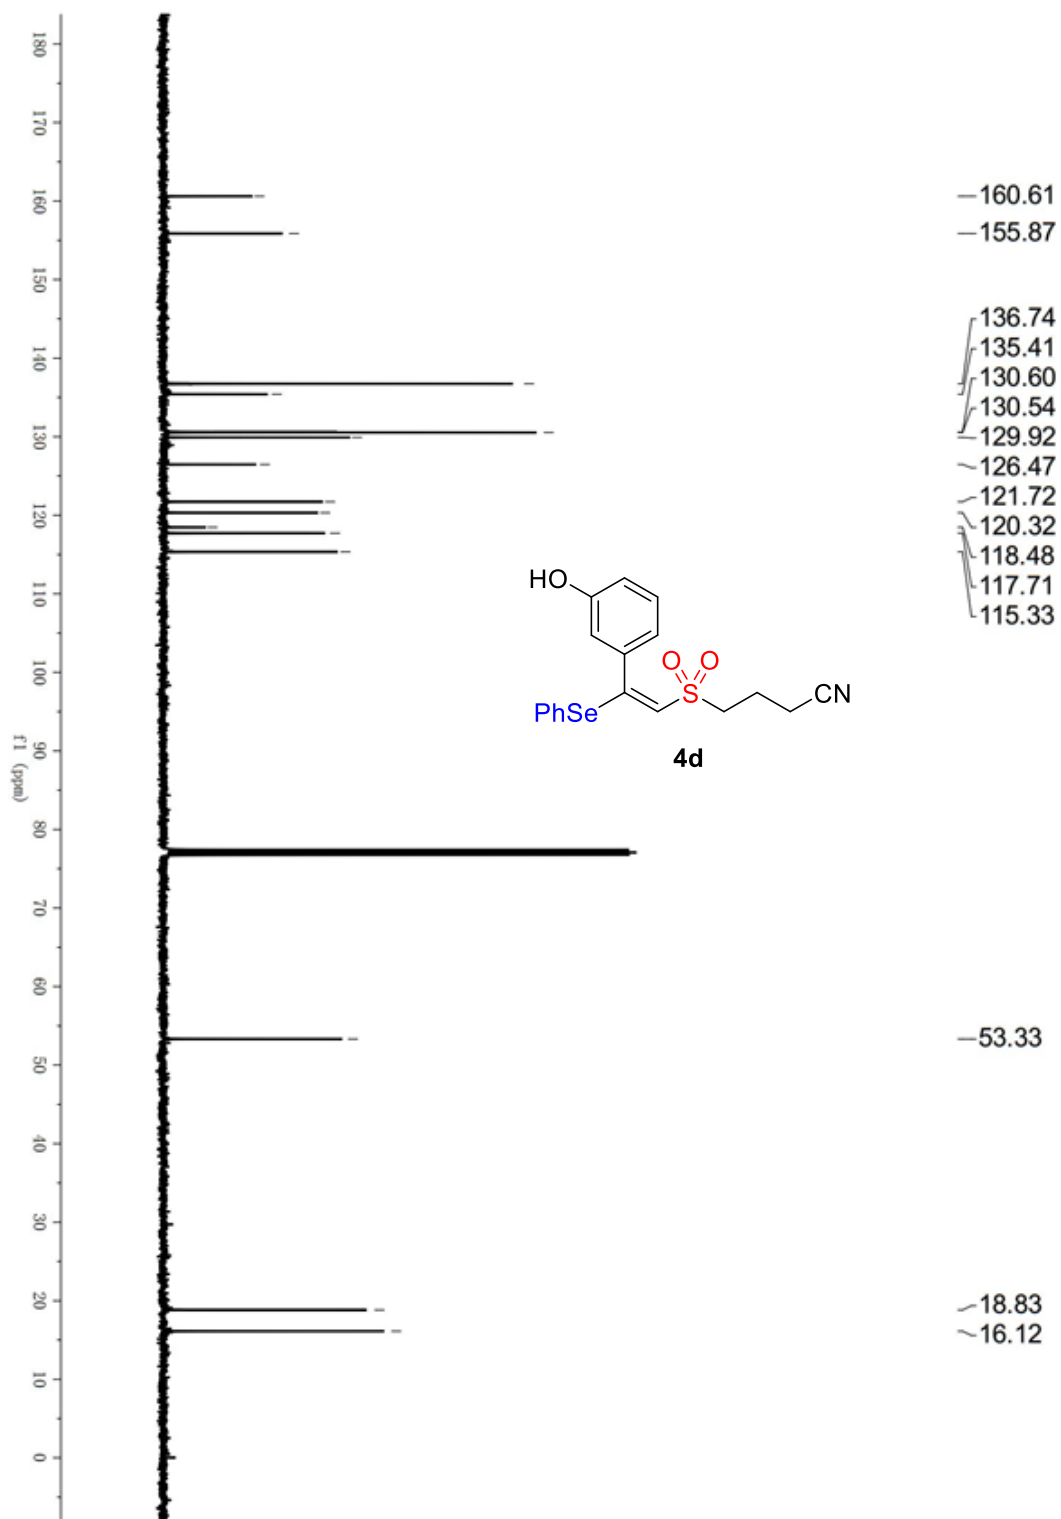

$^1\text{H}$  NMR spectrum of compound **4e** (400 MHz,  $\text{CDCl}_3$ )

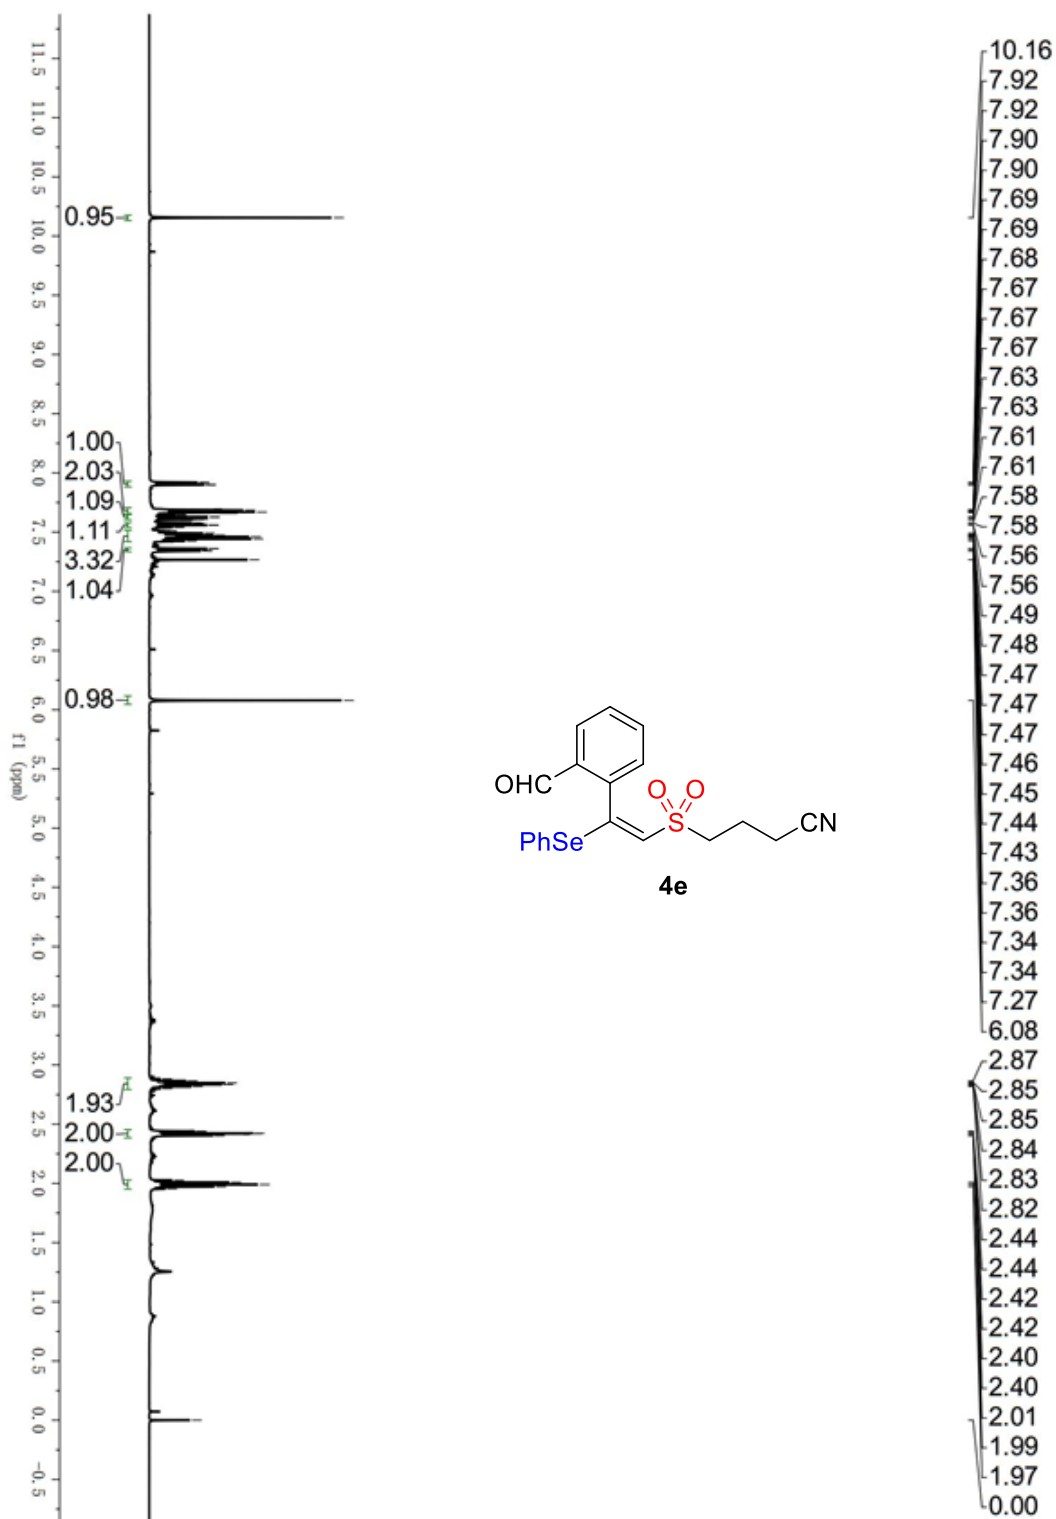

$^{13}\text{C}$  NMR spectrum of compound **4e** (100 MHz,  $\text{CDCl}_3$ )

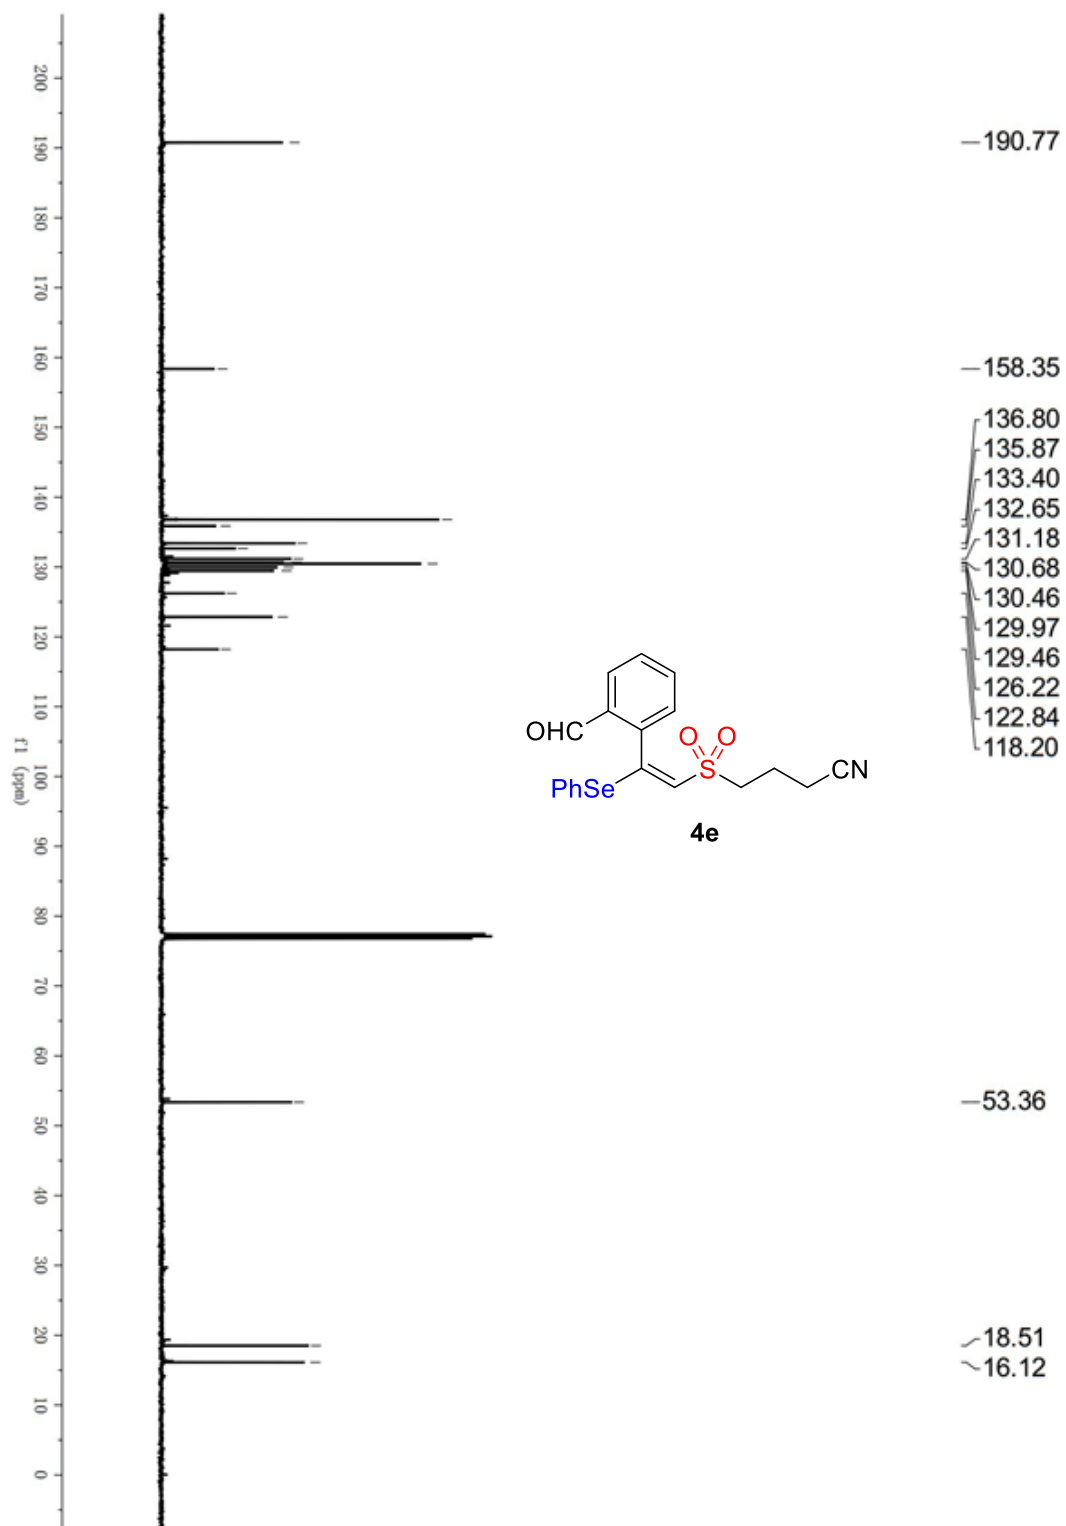

$^1\text{H}$  NMR spectrum of compound **4f** (400 MHz,  $\text{CDCl}_3$ )

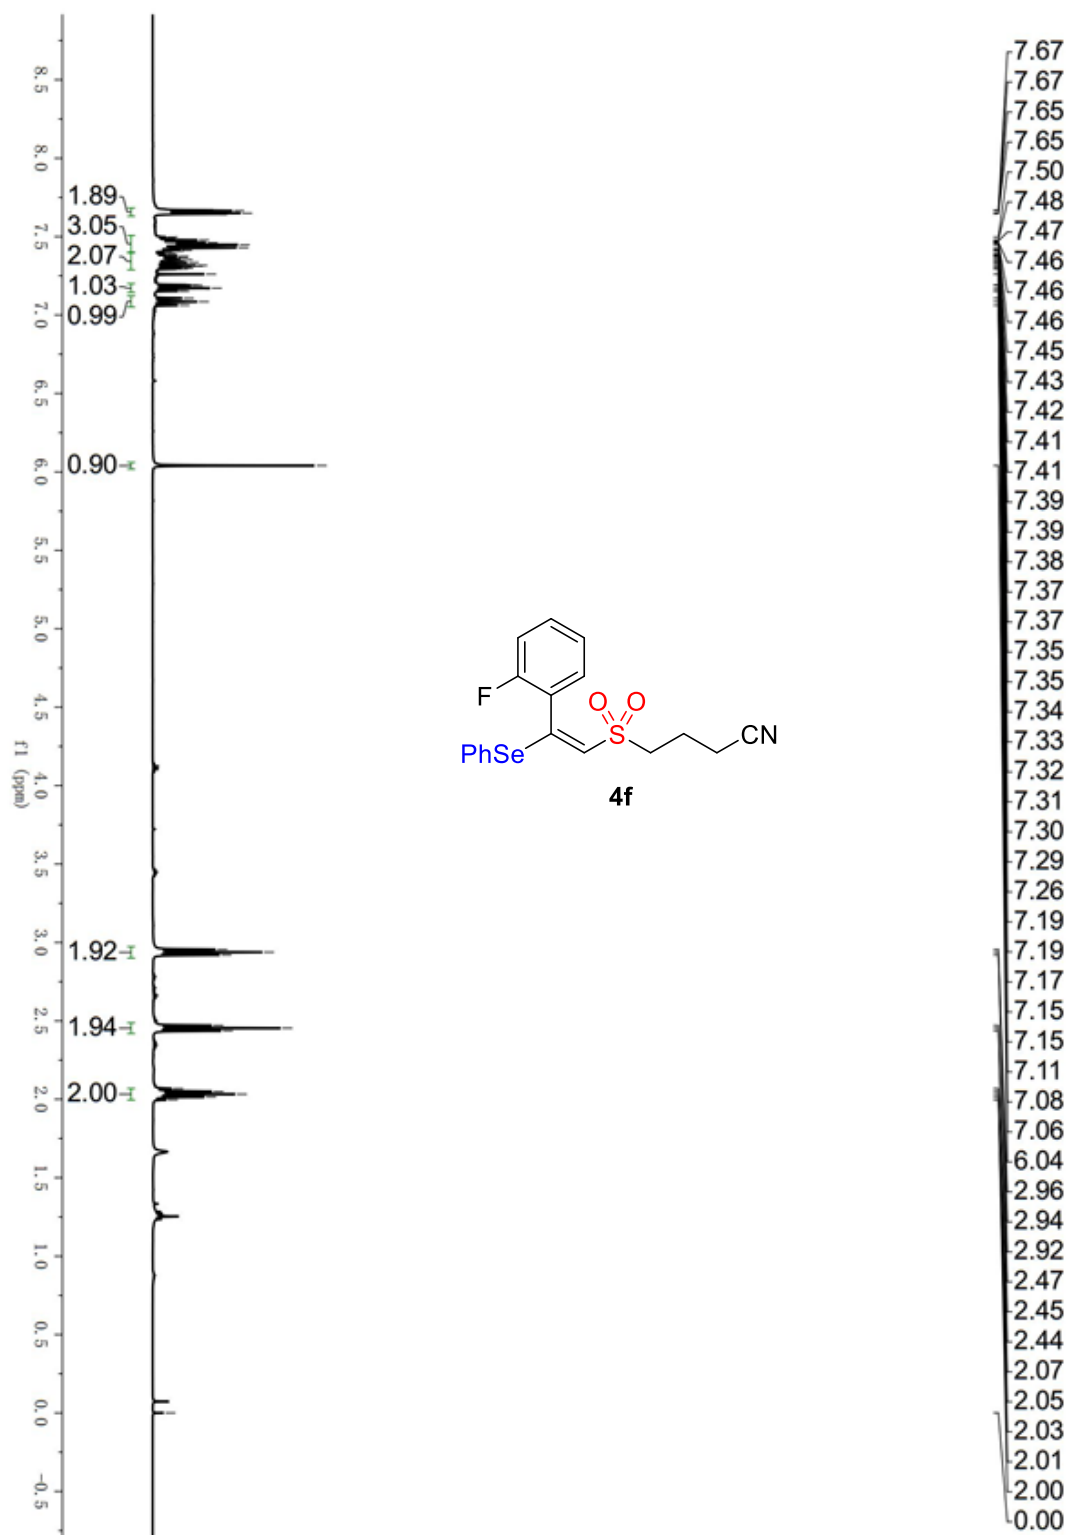

$^{13}\text{C}$  NMR spectrum of compound **4f** (100 MHz,  $\text{CDCl}_3$ )

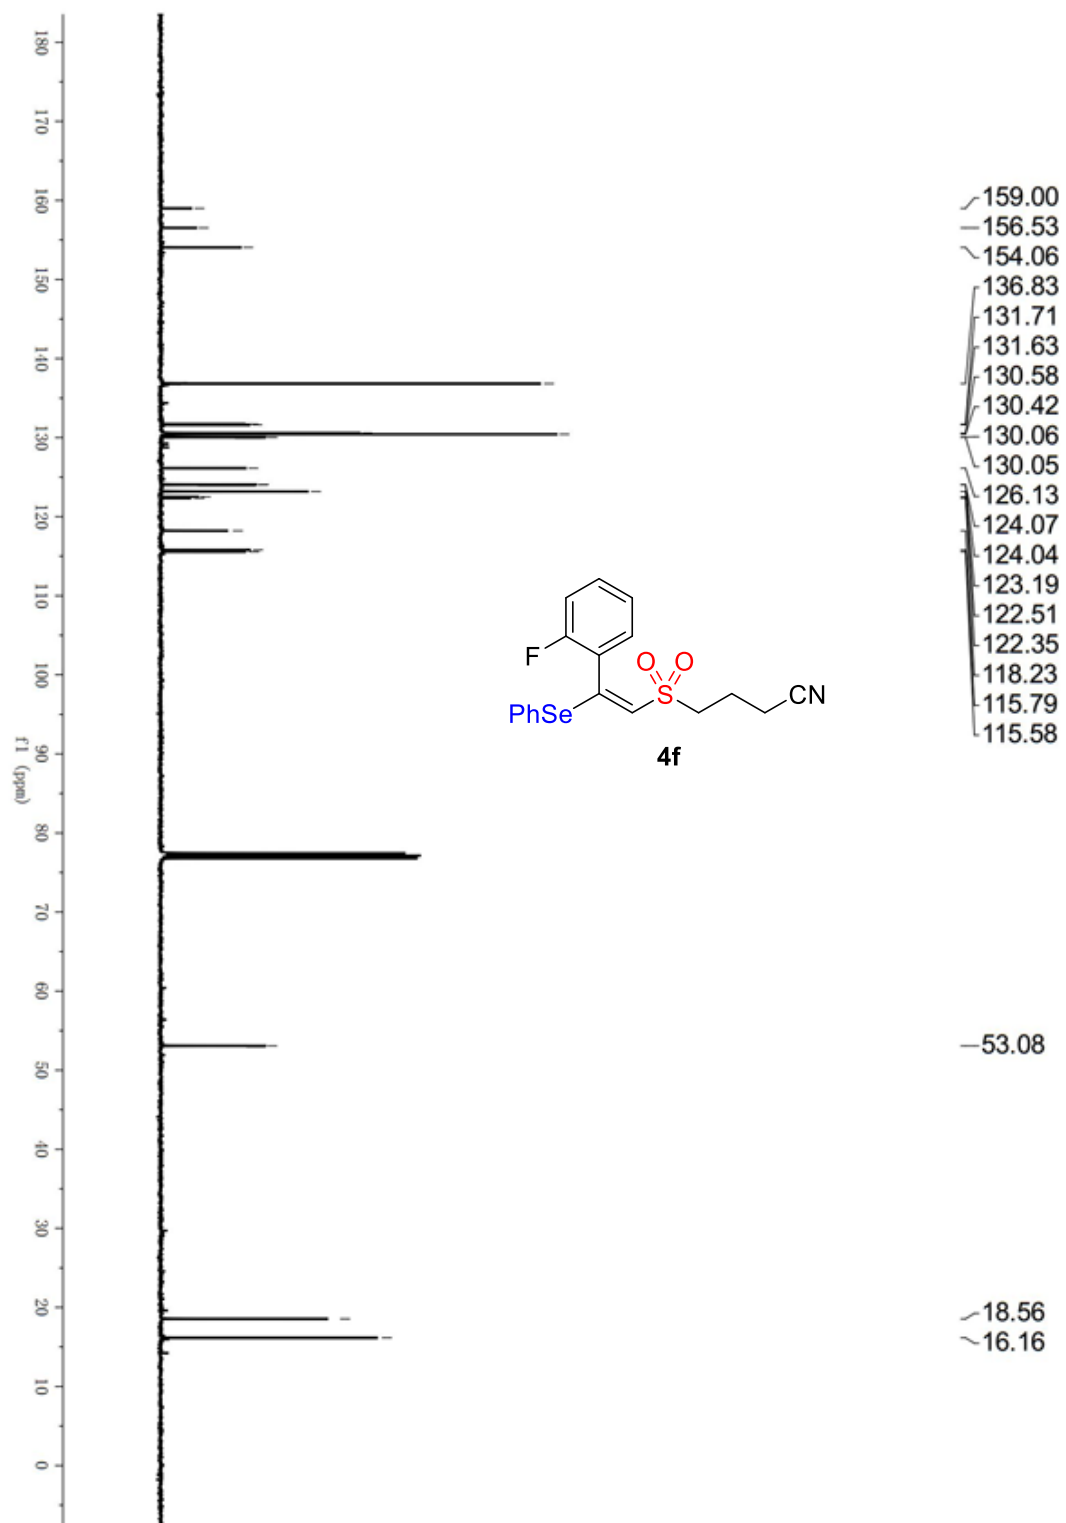

$^1\text{H}$  NMR spectrum of compound **4g** (400 MHz,  $\text{CDCl}_3$ )

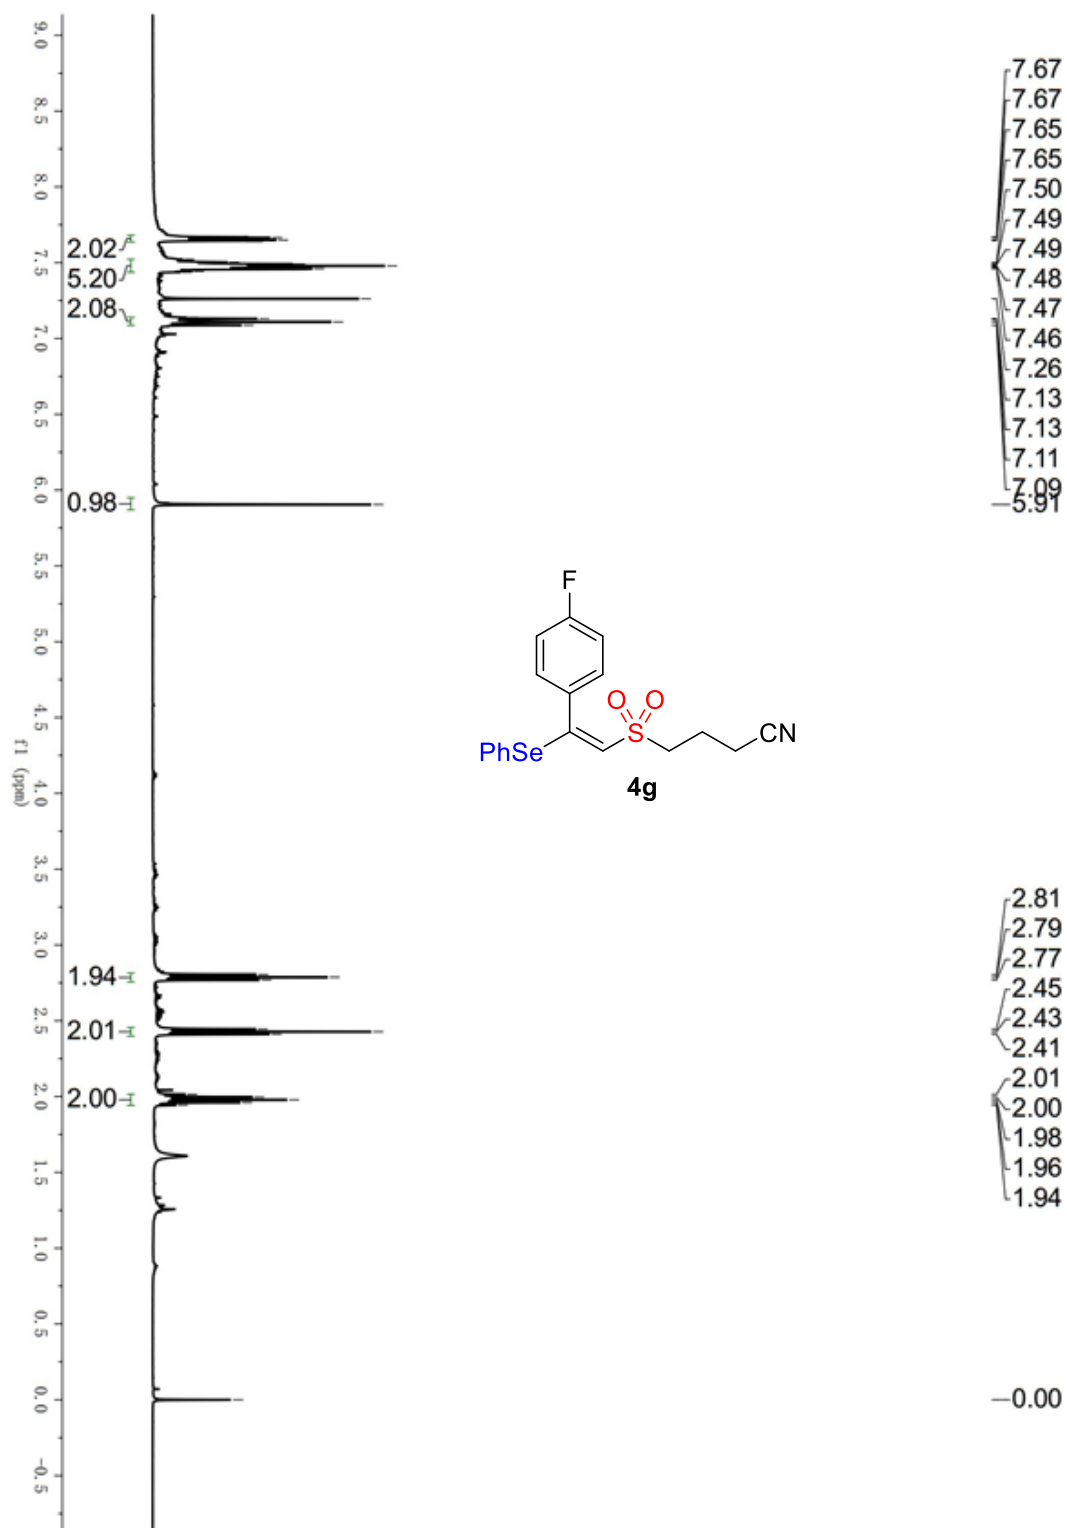

$^{13}\text{C}$  NMR spectrum of compound **4g** (100 MHz,  $\text{CDCl}_3$ )

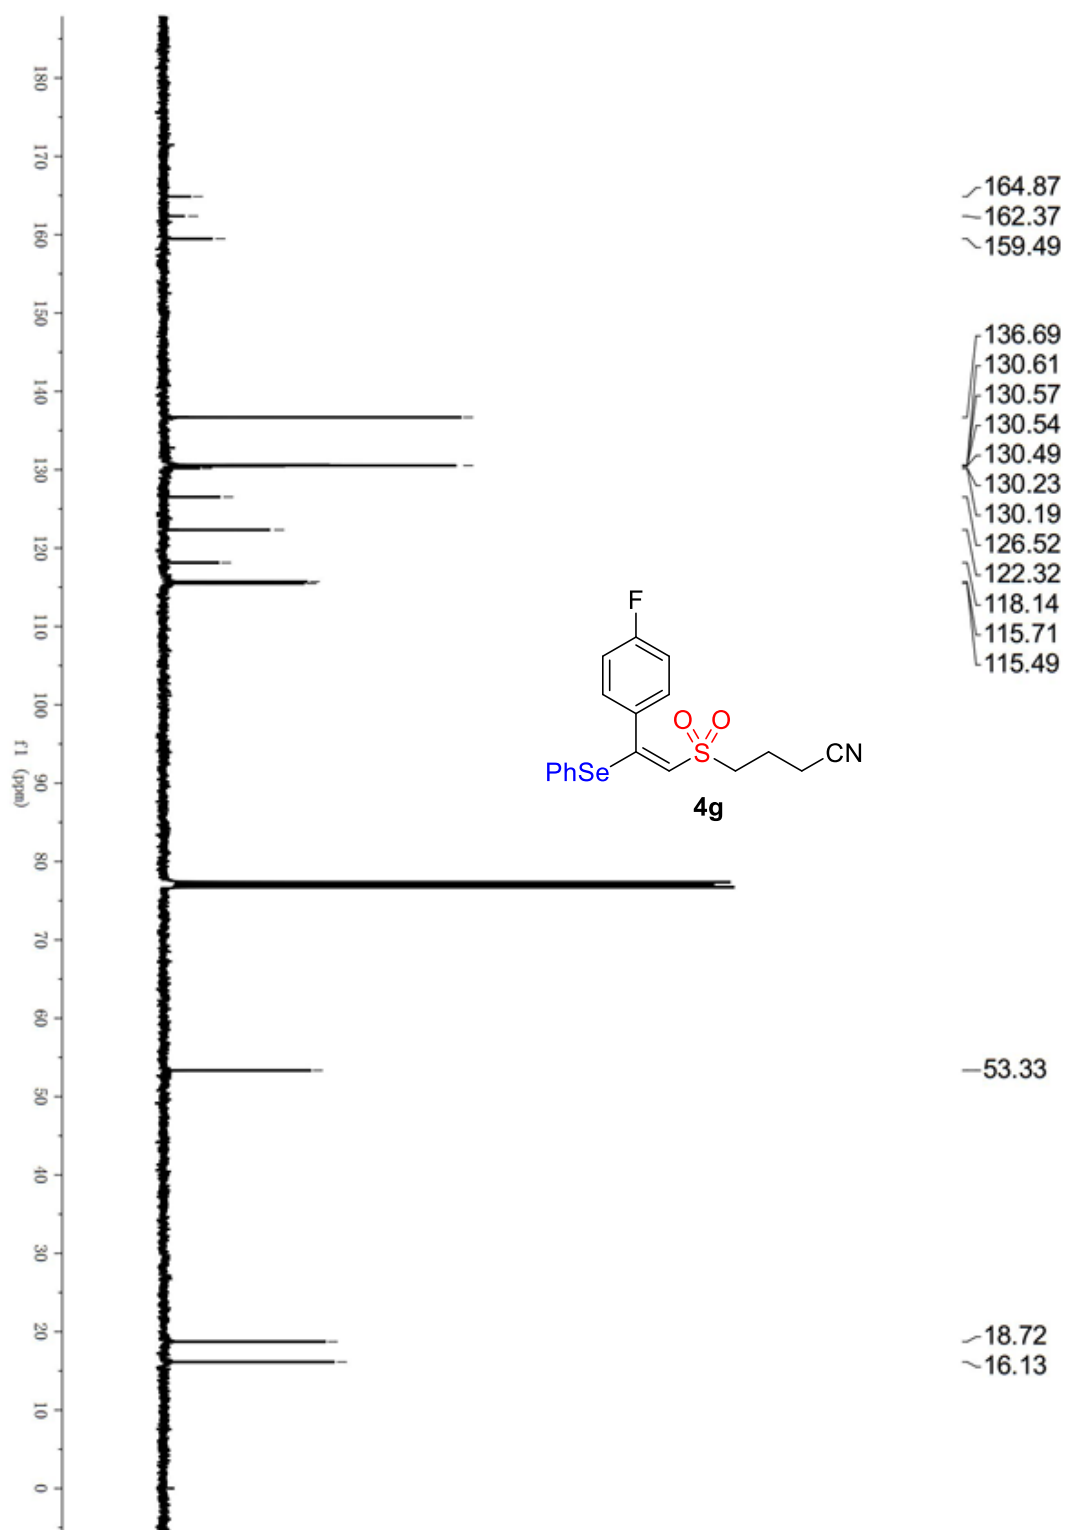



$^1\text{H}$  NMR spectrum of compound **4h** (400 MHz,  $\text{CDCl}_3$ )

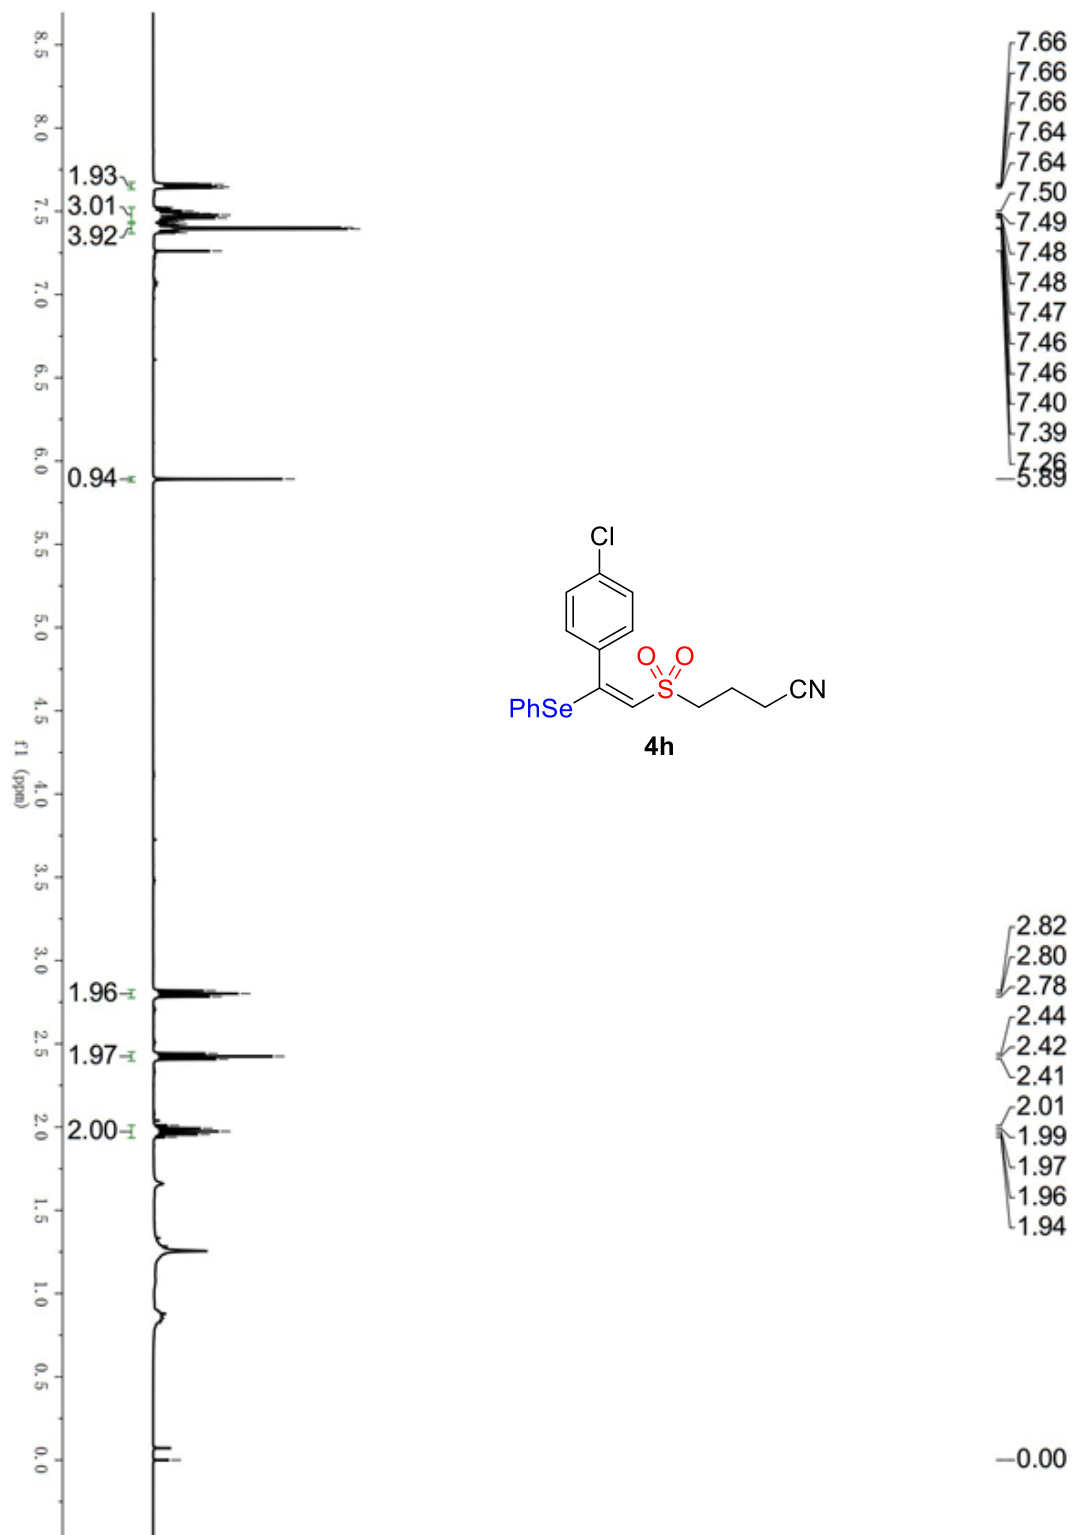

$^{13}\text{C}$  NMR spectrum of compound **4h** (100 MHz,  $\text{CDCl}_3$ )

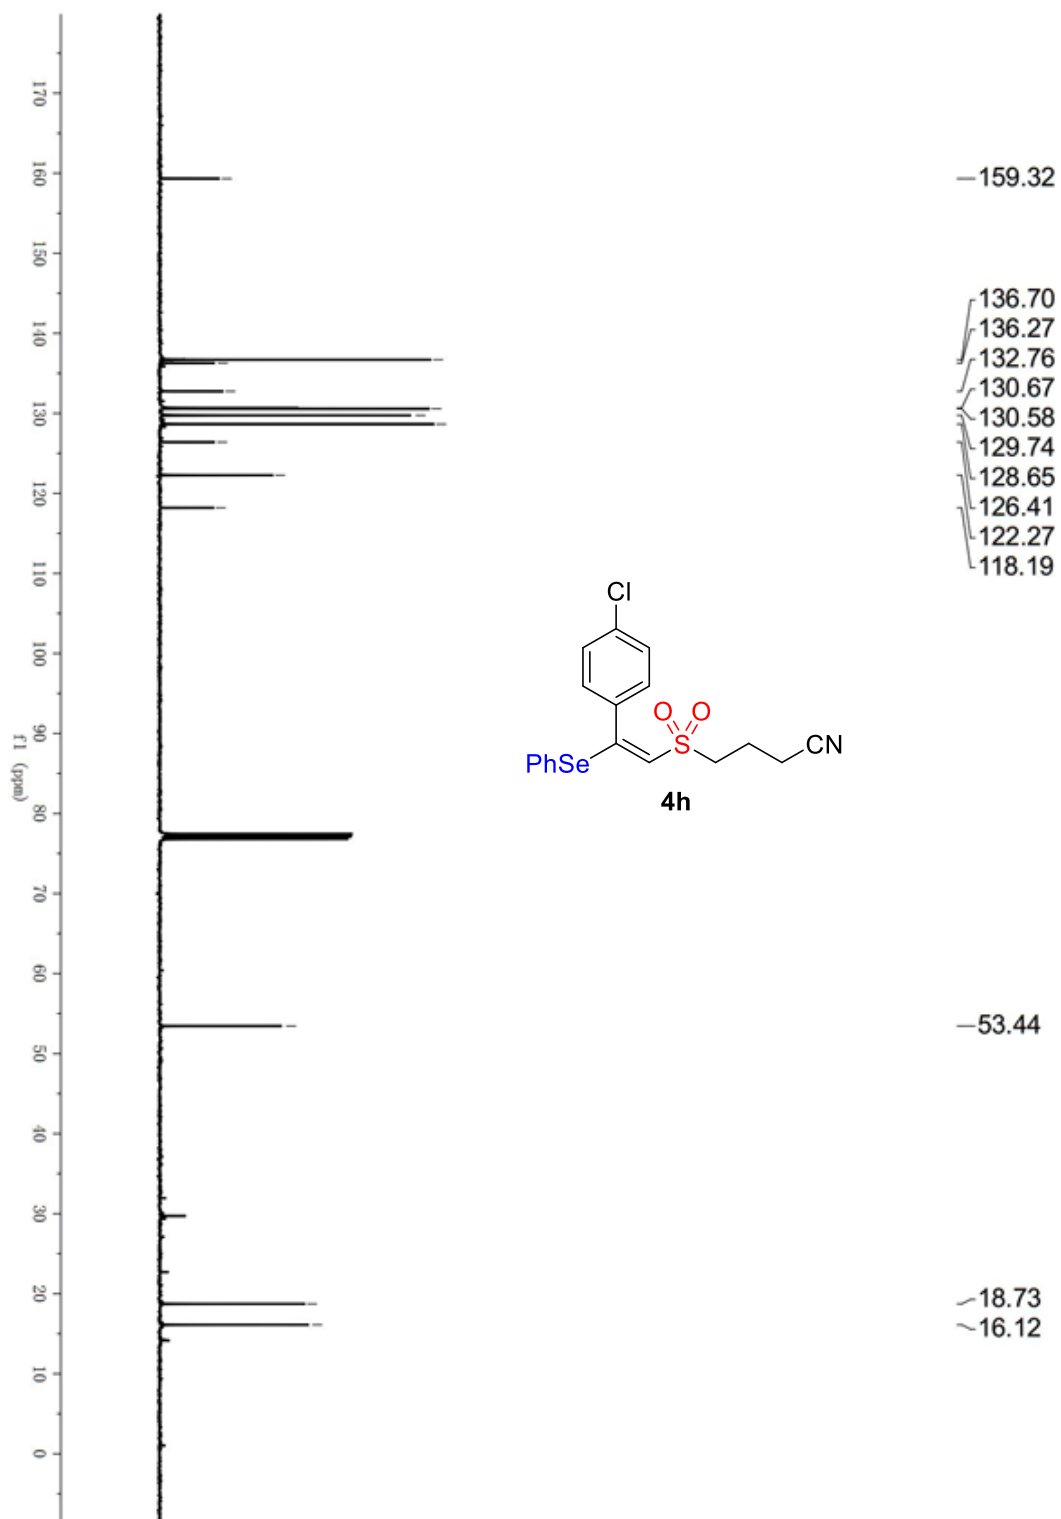

$^1\text{H}$  NMR spectrum of compound **4i** (400 MHz,  $\text{CDCl}_3$ )

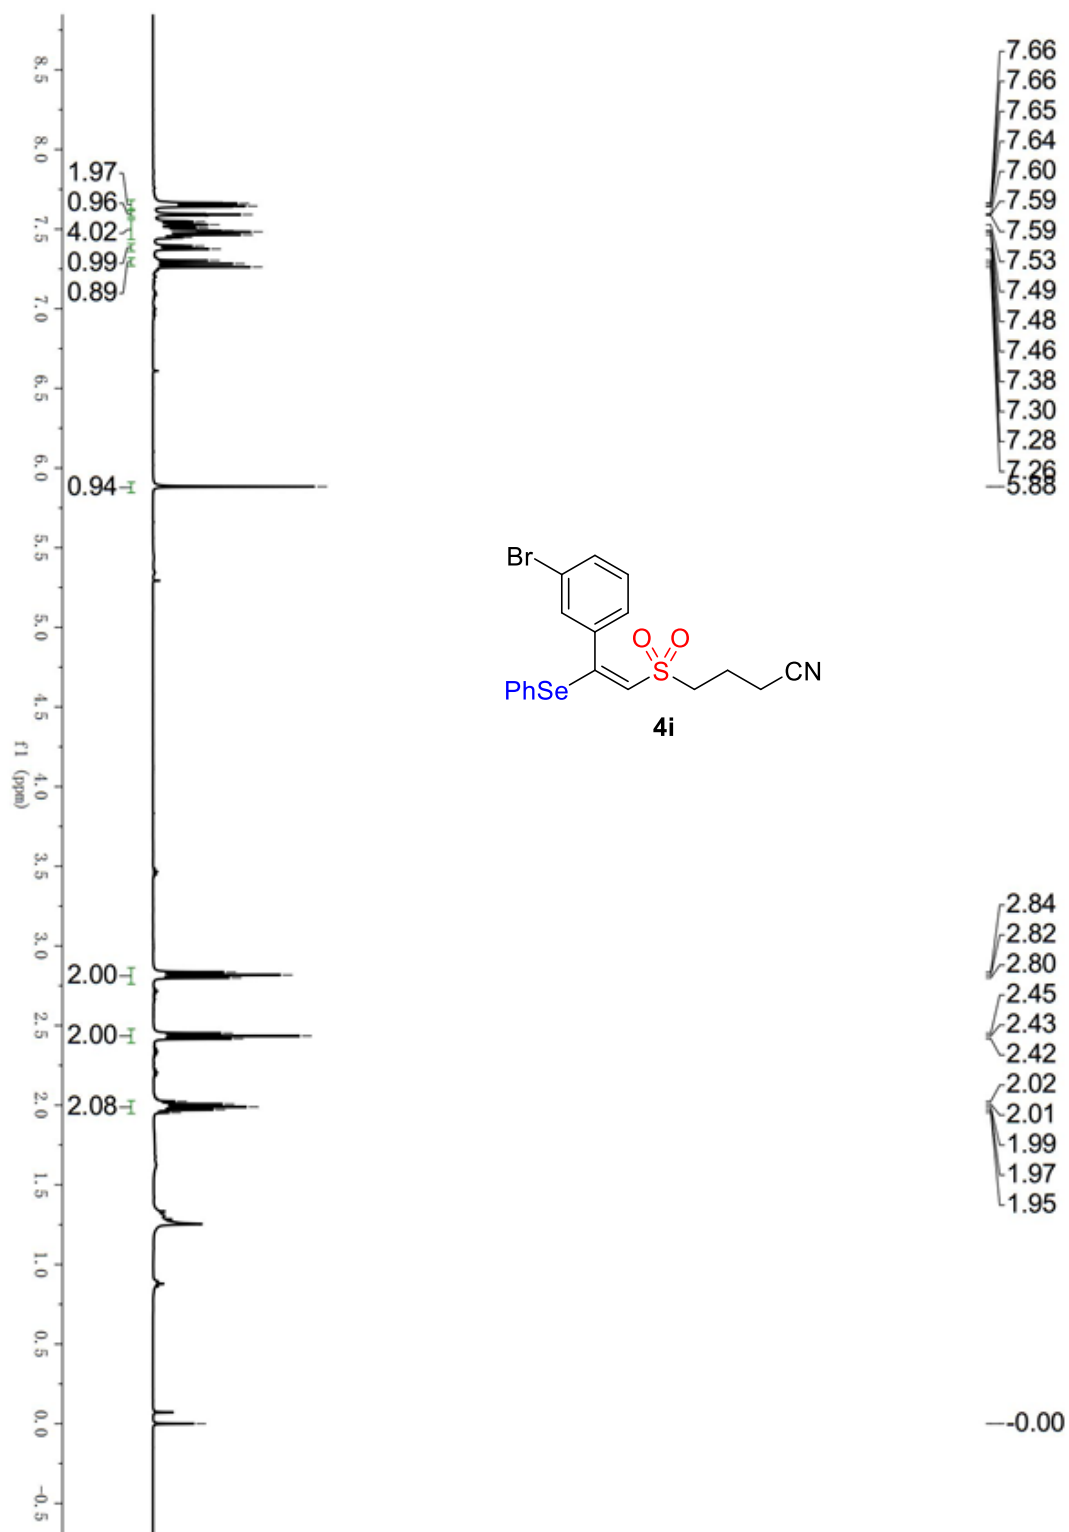

$^{13}\text{C}$  NMR spectrum of compound **4i** (100 MHz,  $\text{CDCl}_3$ )

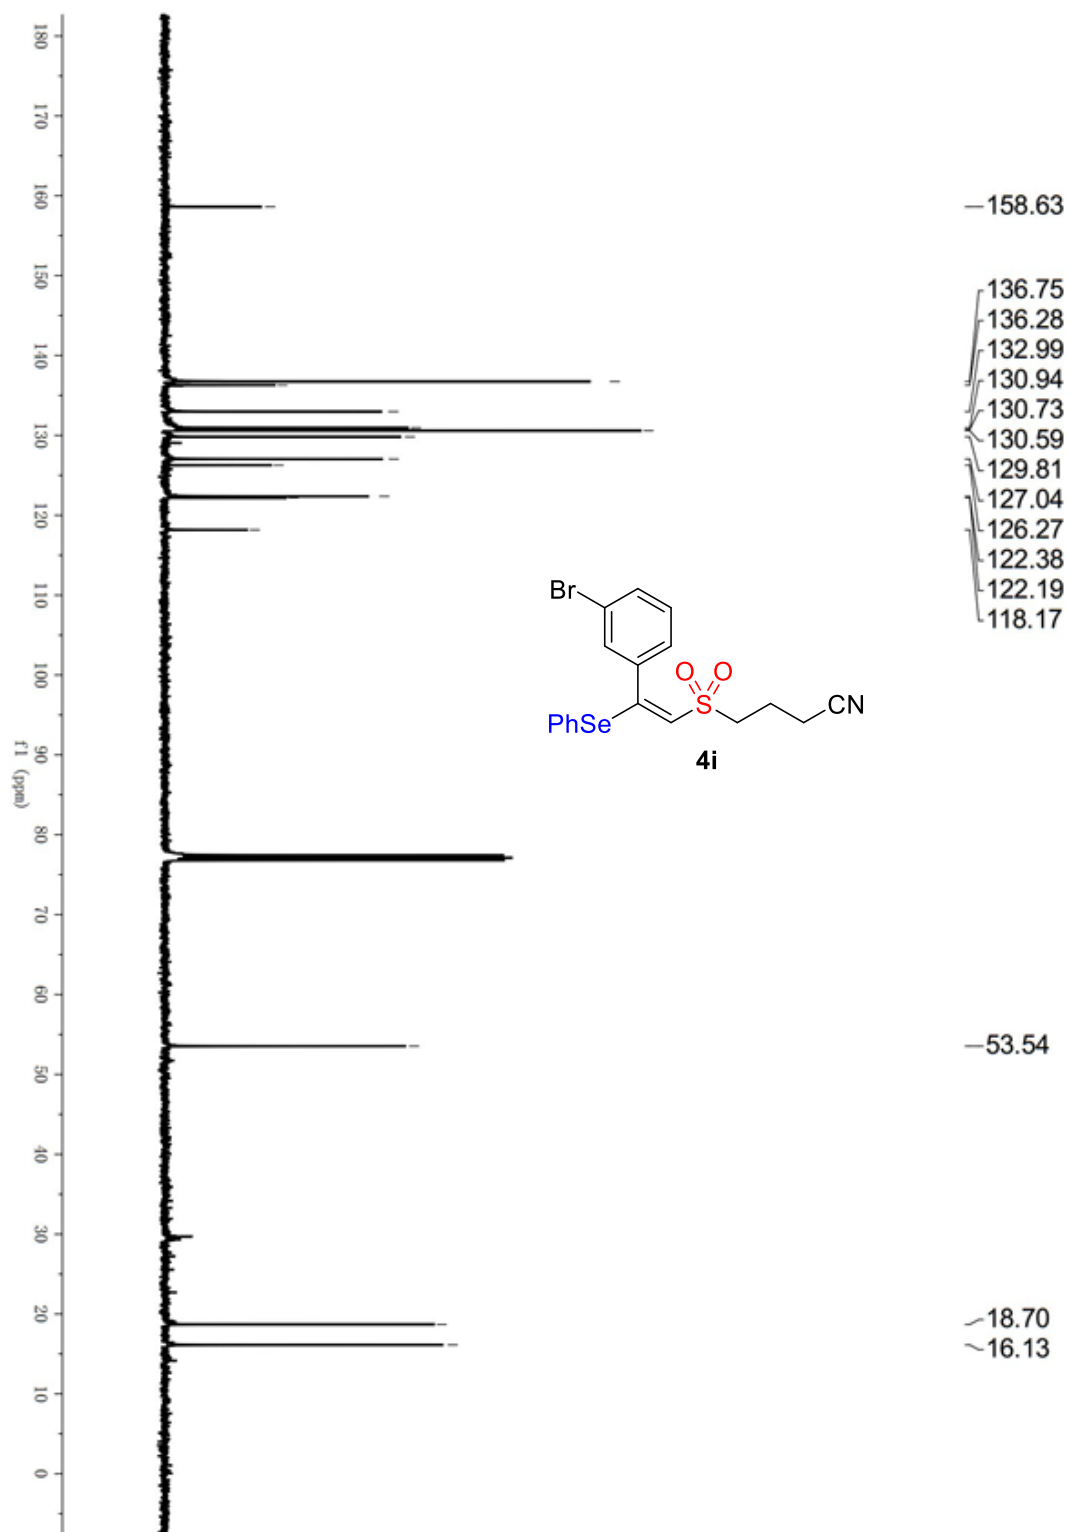

$^1\text{H}$  NMR spectrum of compound **4j** (400 MHz,  $\text{CDCl}_3$ )

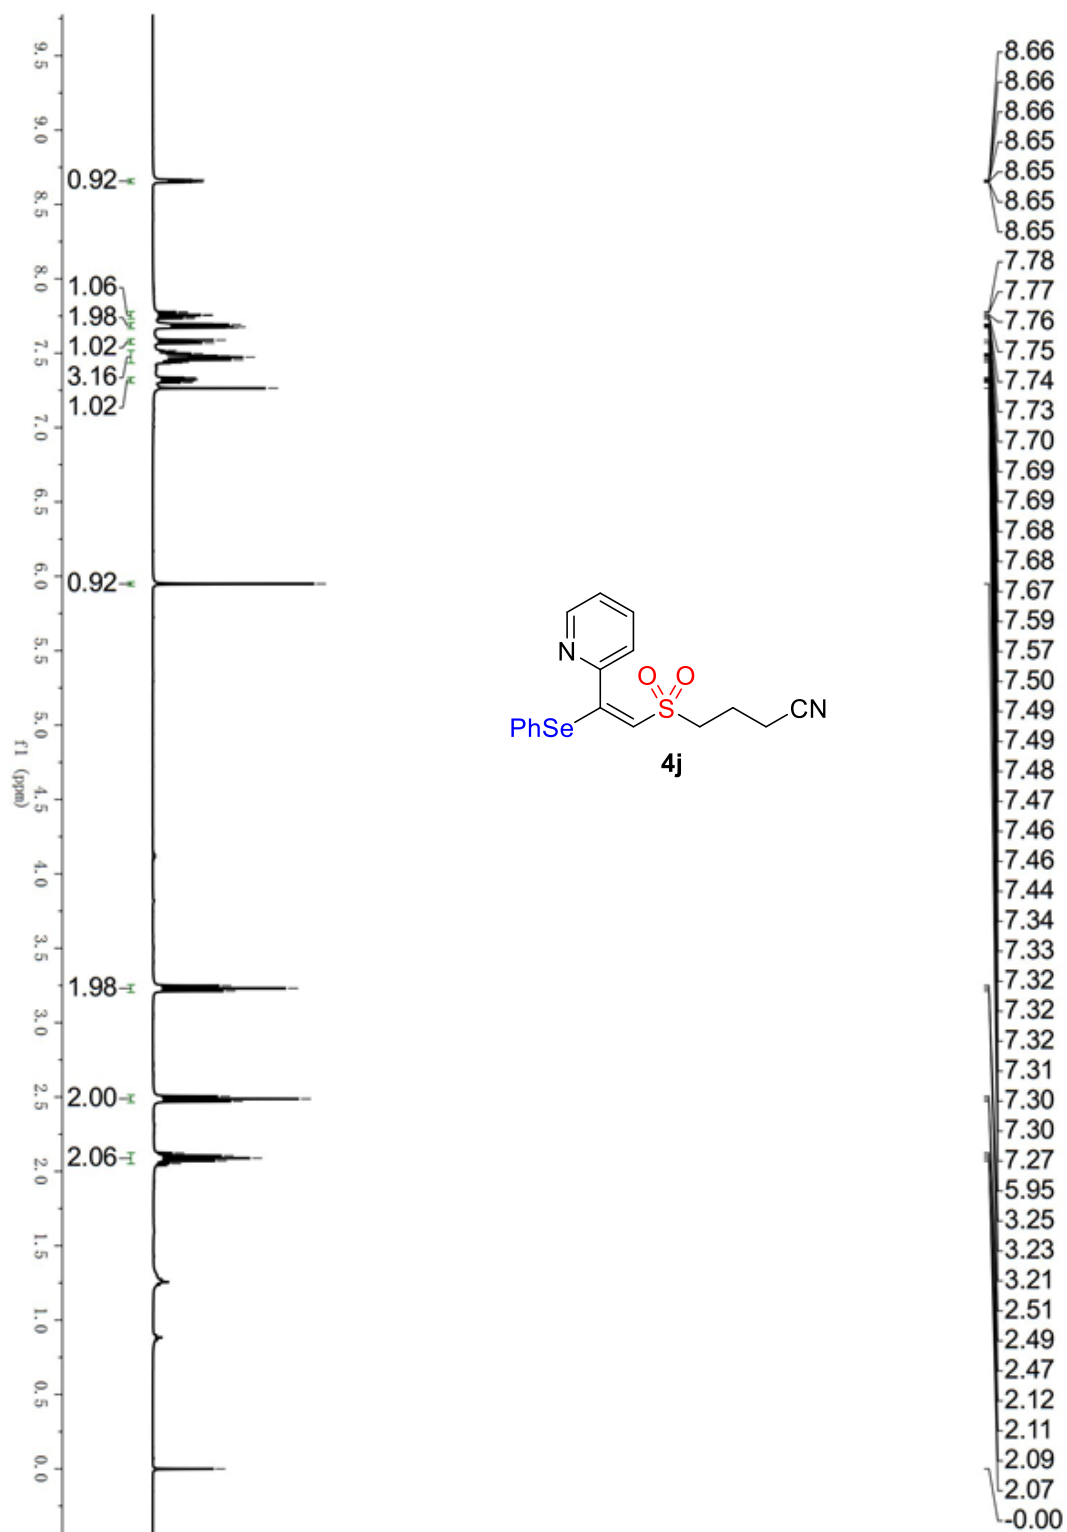

$^{13}\text{C}$  NMR spectrum of compound **4j** (100 MHz,  $\text{CDCl}_3$ )

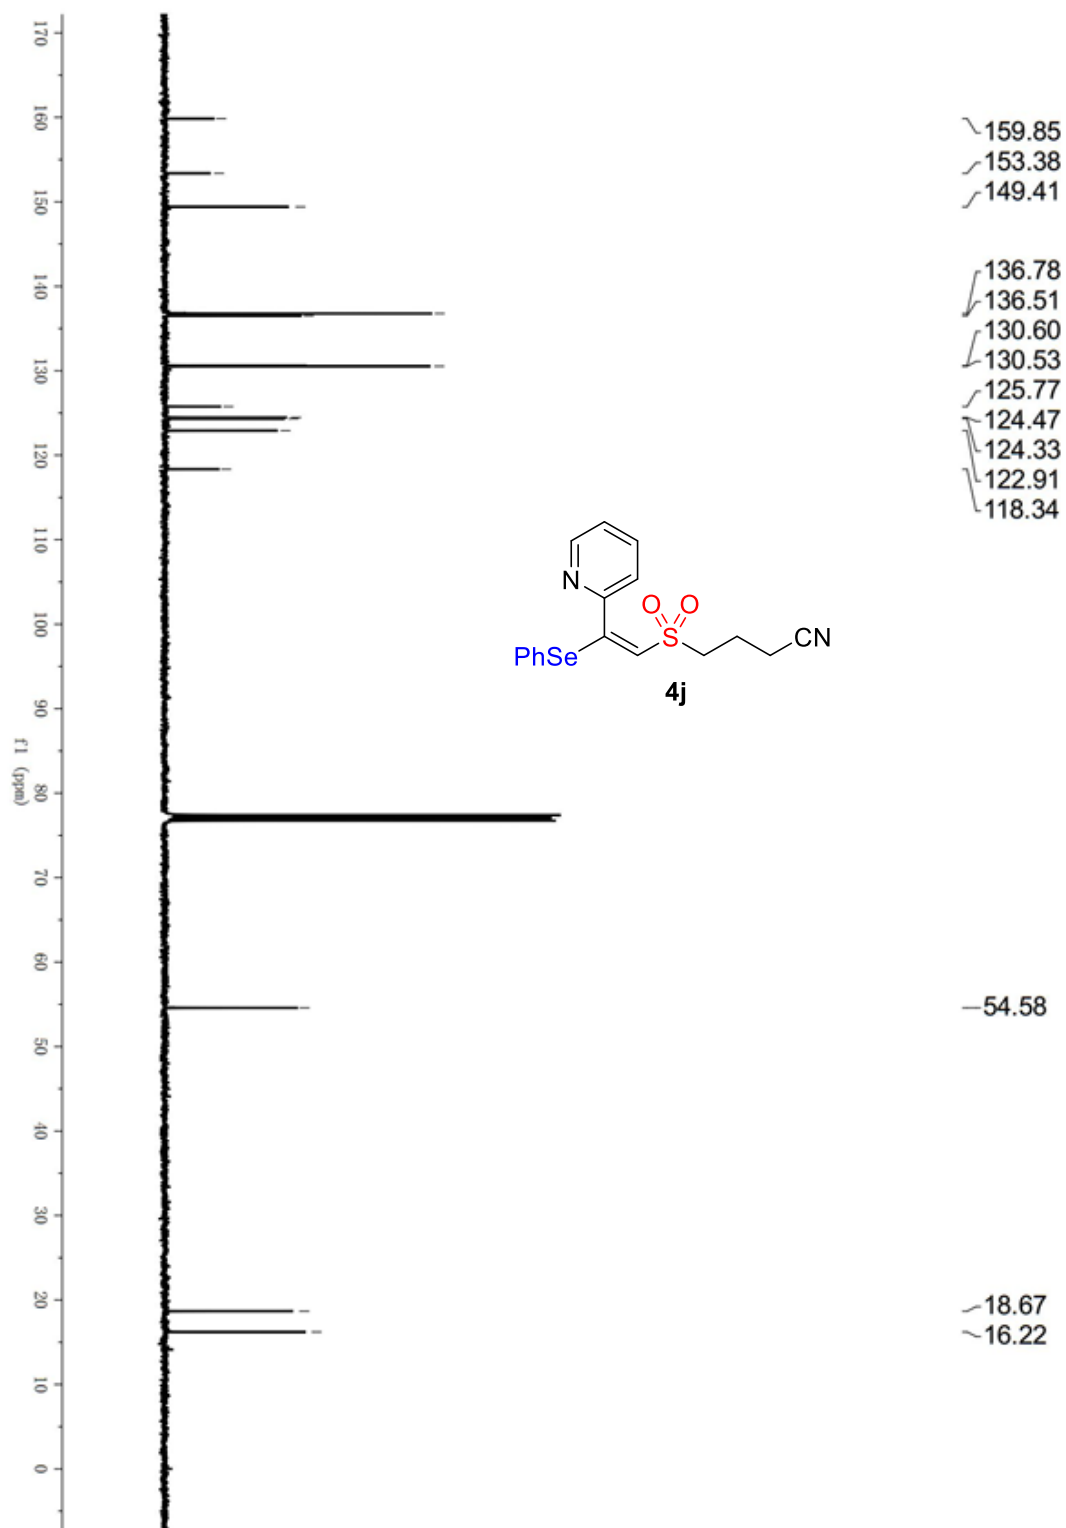

$^1\text{H}$  NMR spectrum of compound **4k** (400 MHz,  $\text{CDCl}_3$ )

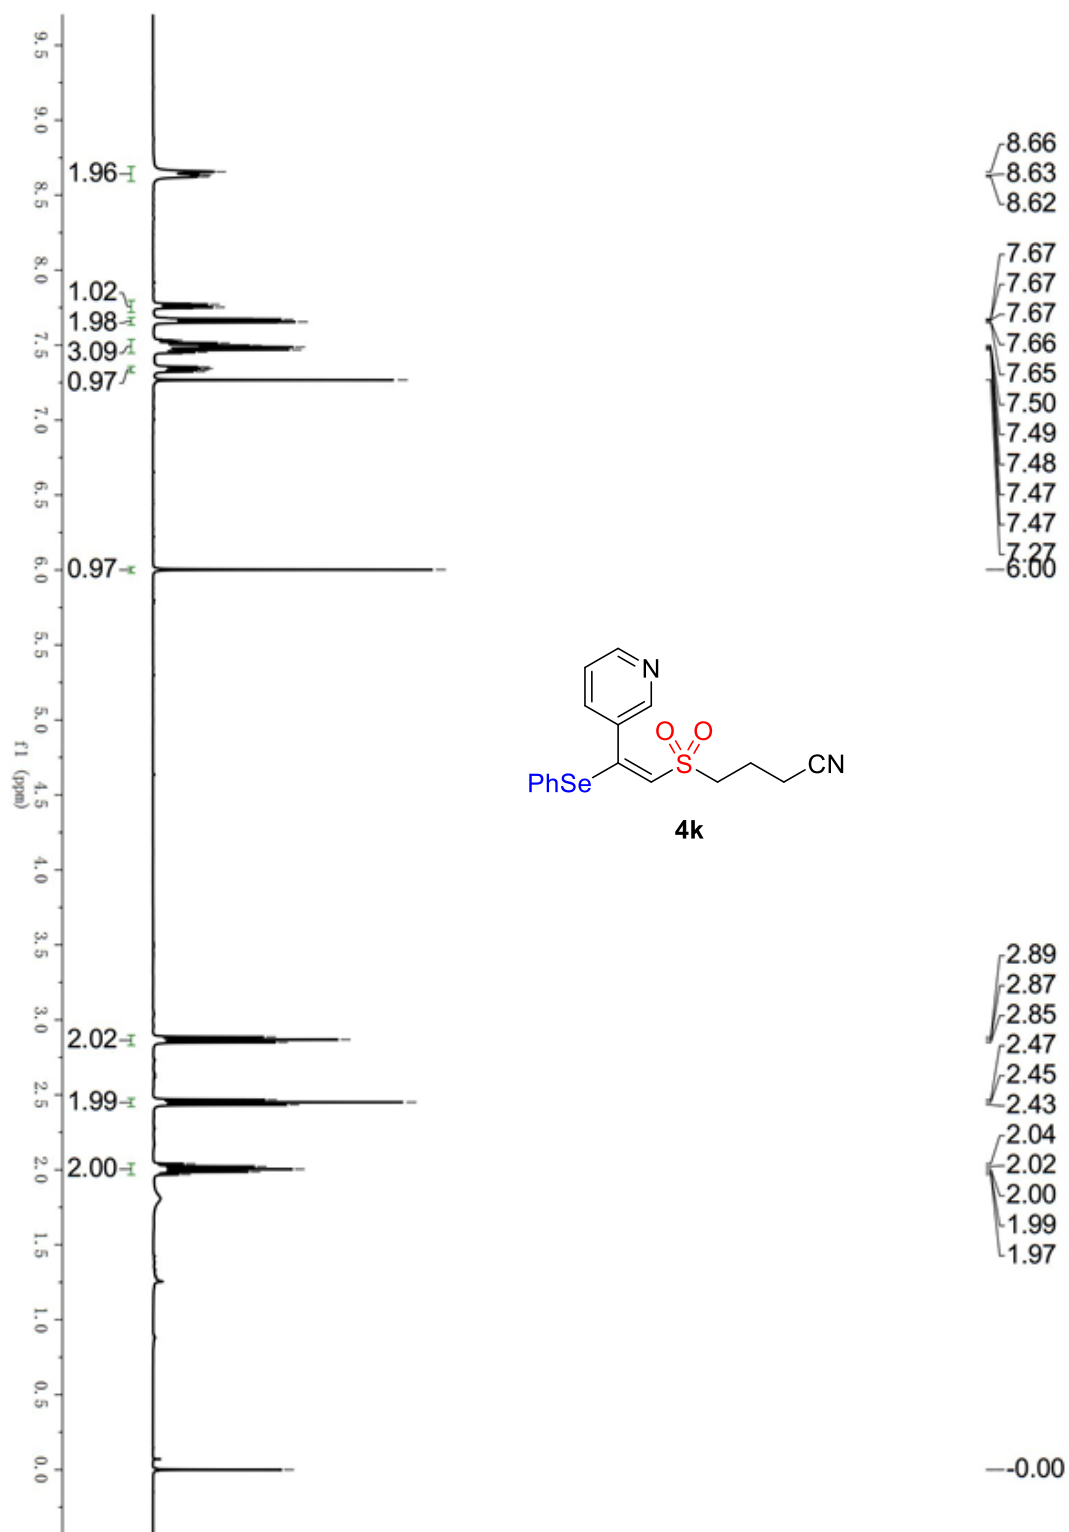

$^{13}\text{C}$  NMR spectrum of compound **4k** (100 MHz,  $\text{CDCl}_3$ )

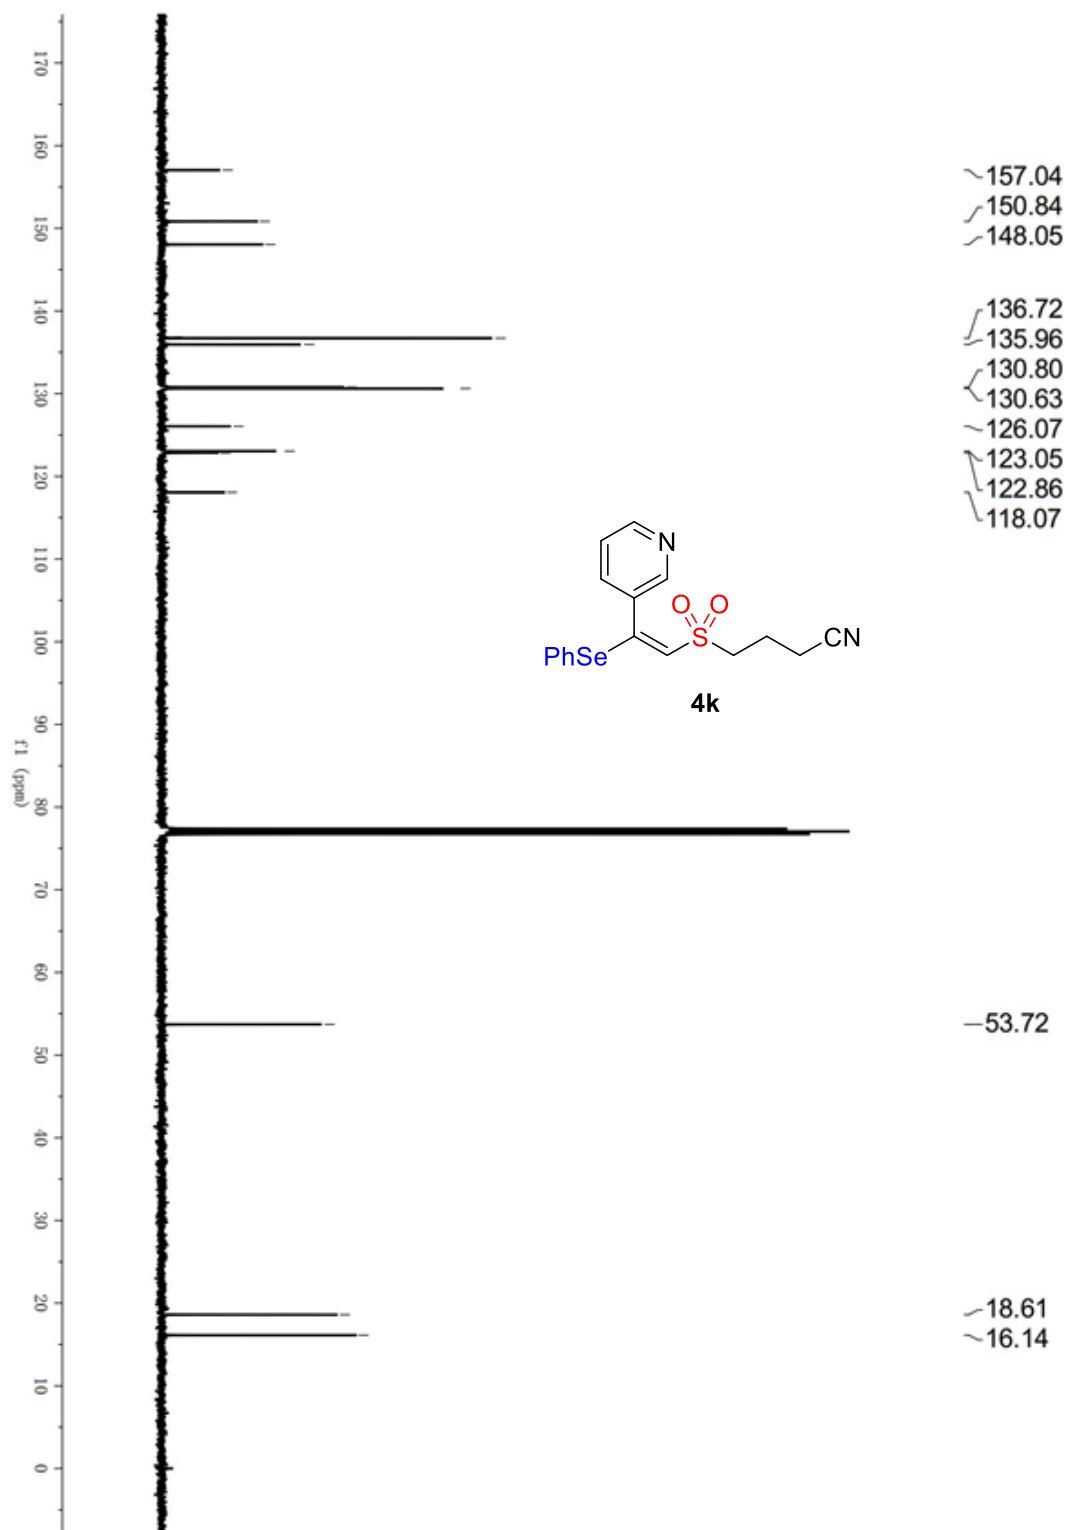



$^1\text{H}$  NMR spectrum of compound **41** (400 MHz,  $\text{CDCl}_3$ )

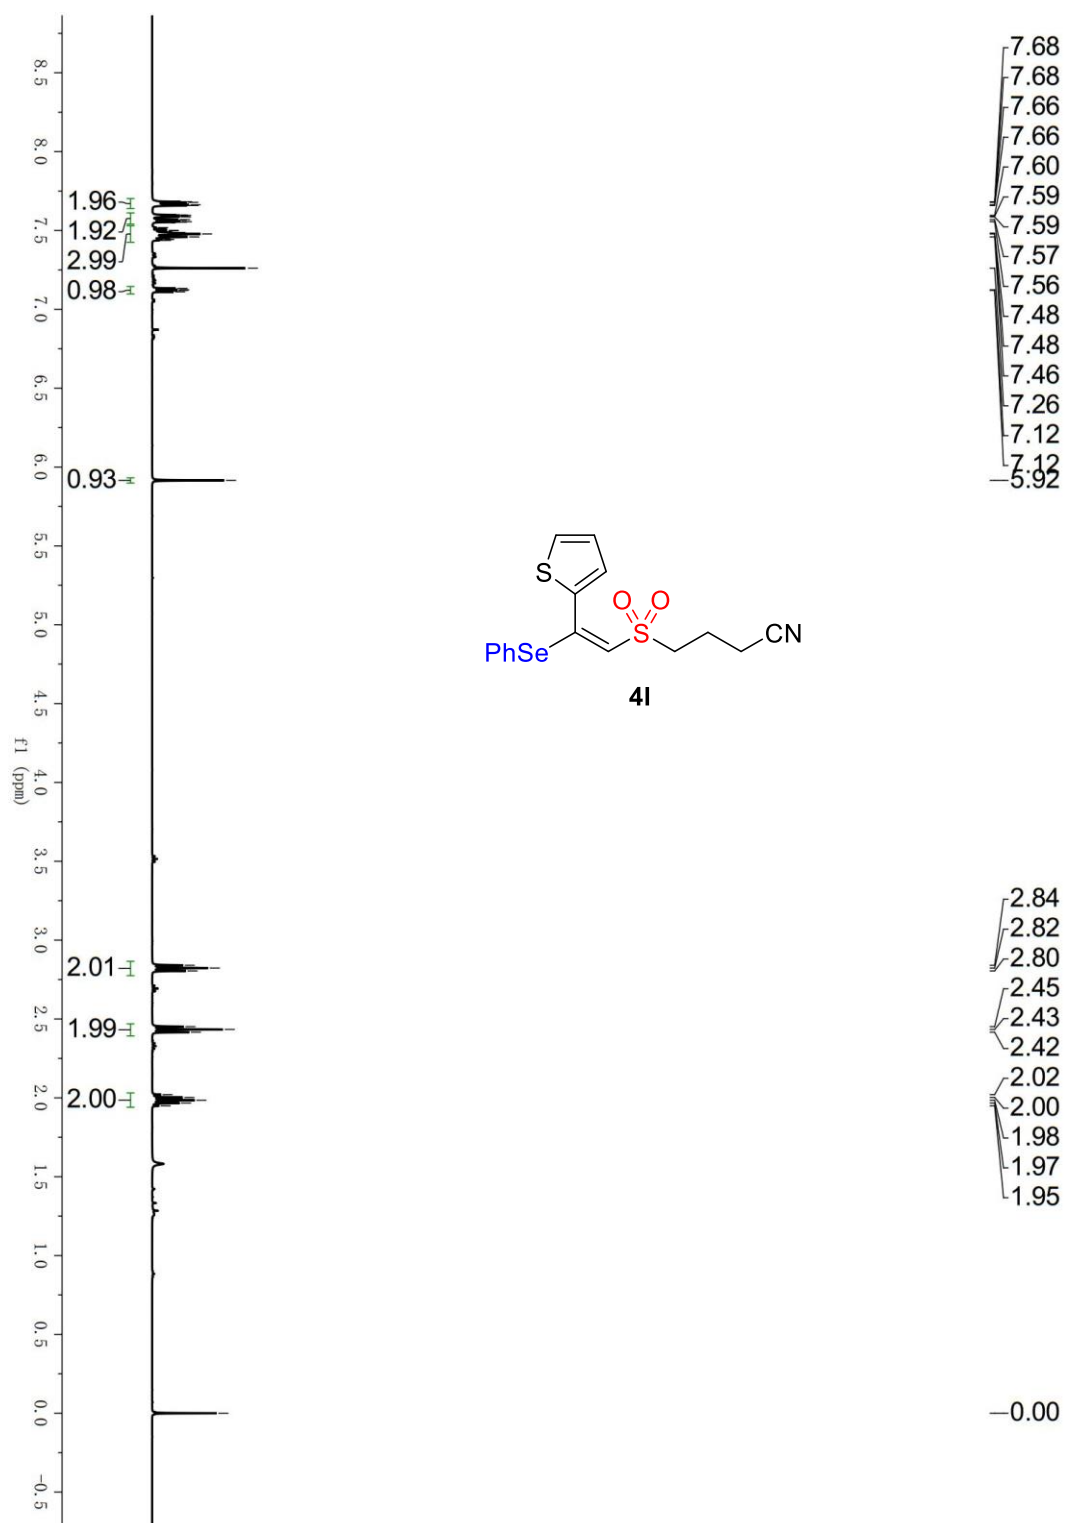

$^{13}\text{C}$  NMR spectrum of compound **4I** (100 MHz,  $\text{CDCl}_3$ )

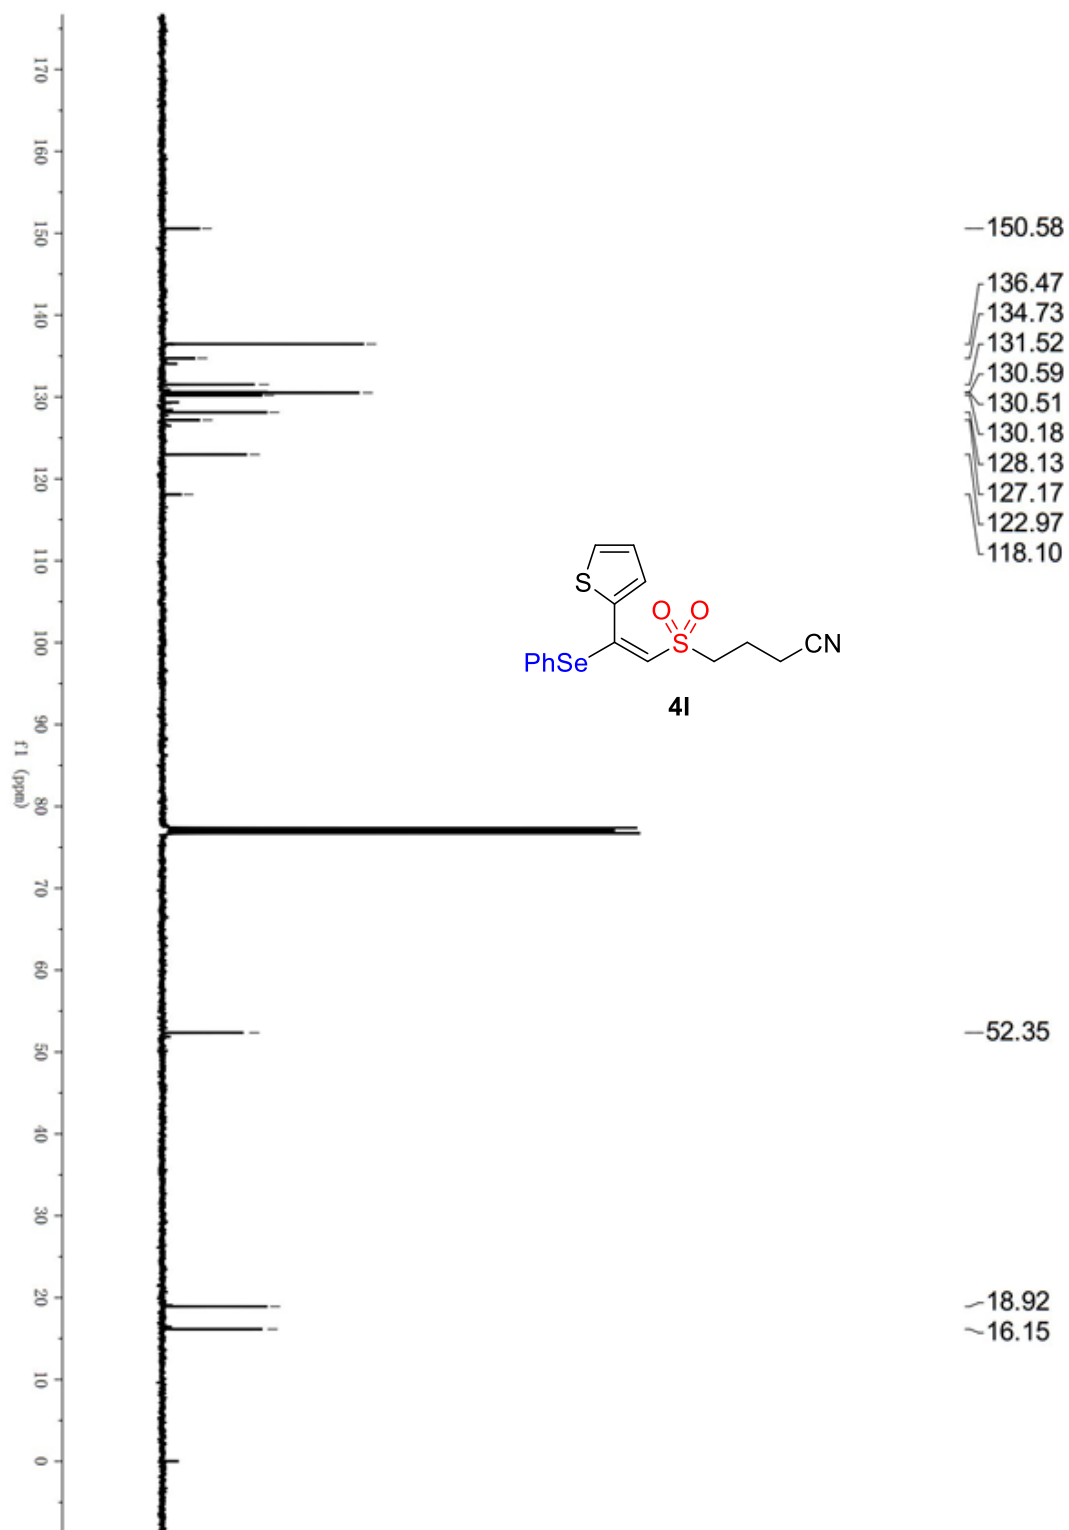

$^1\text{H}$  NMR spectrum of compound **4m** (400 MHz,  $\text{CDCl}_3$ )

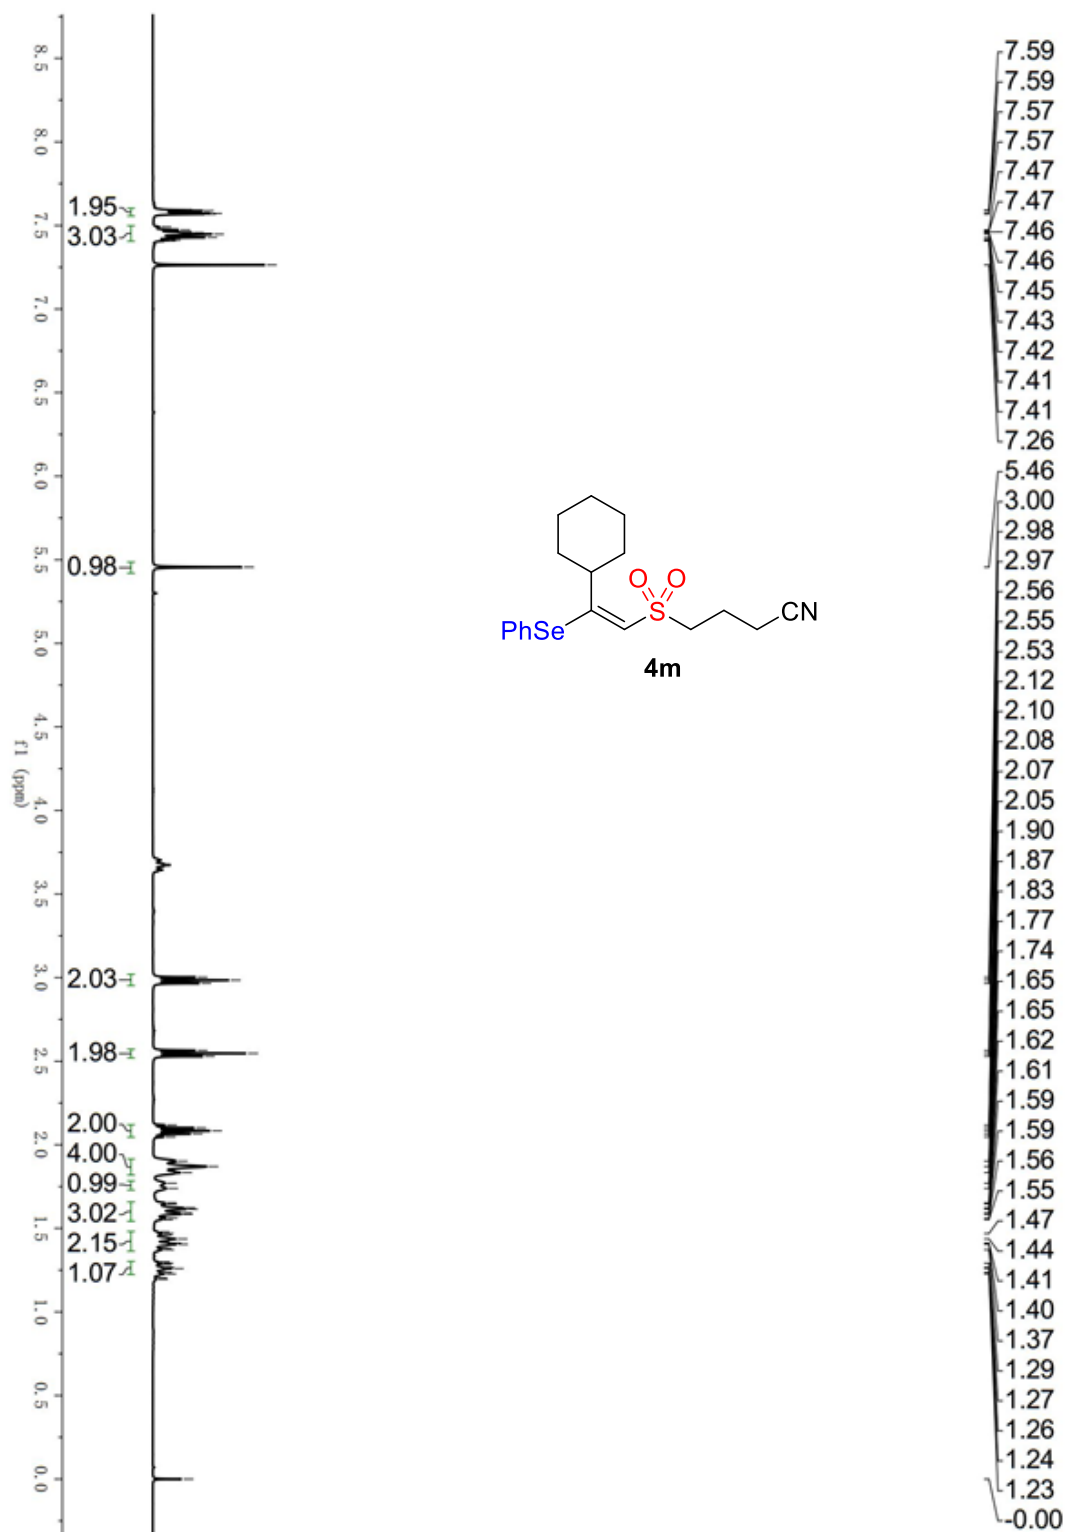

$^{13}\text{C}$  NMR spectrum of compound **4m** (100 MHz,  $\text{CDCl}_3$ )

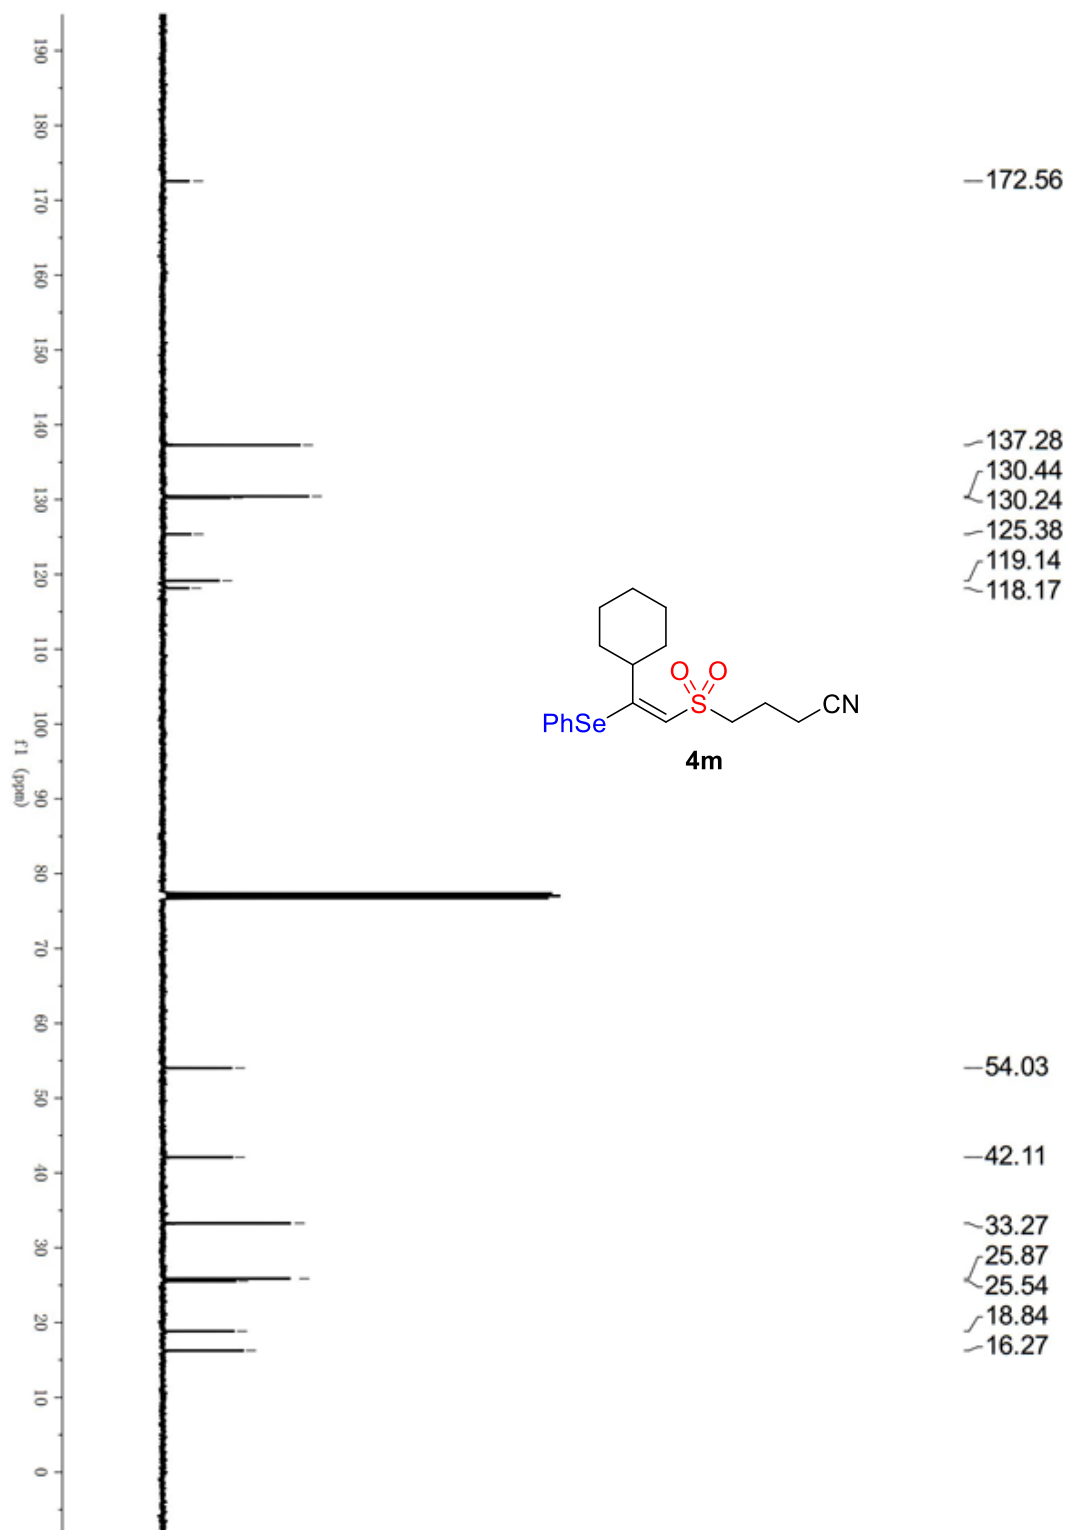

$^1\text{H}$  NMR spectrum of compound **4n** (400 MHz,  $\text{CDCl}_3$ )

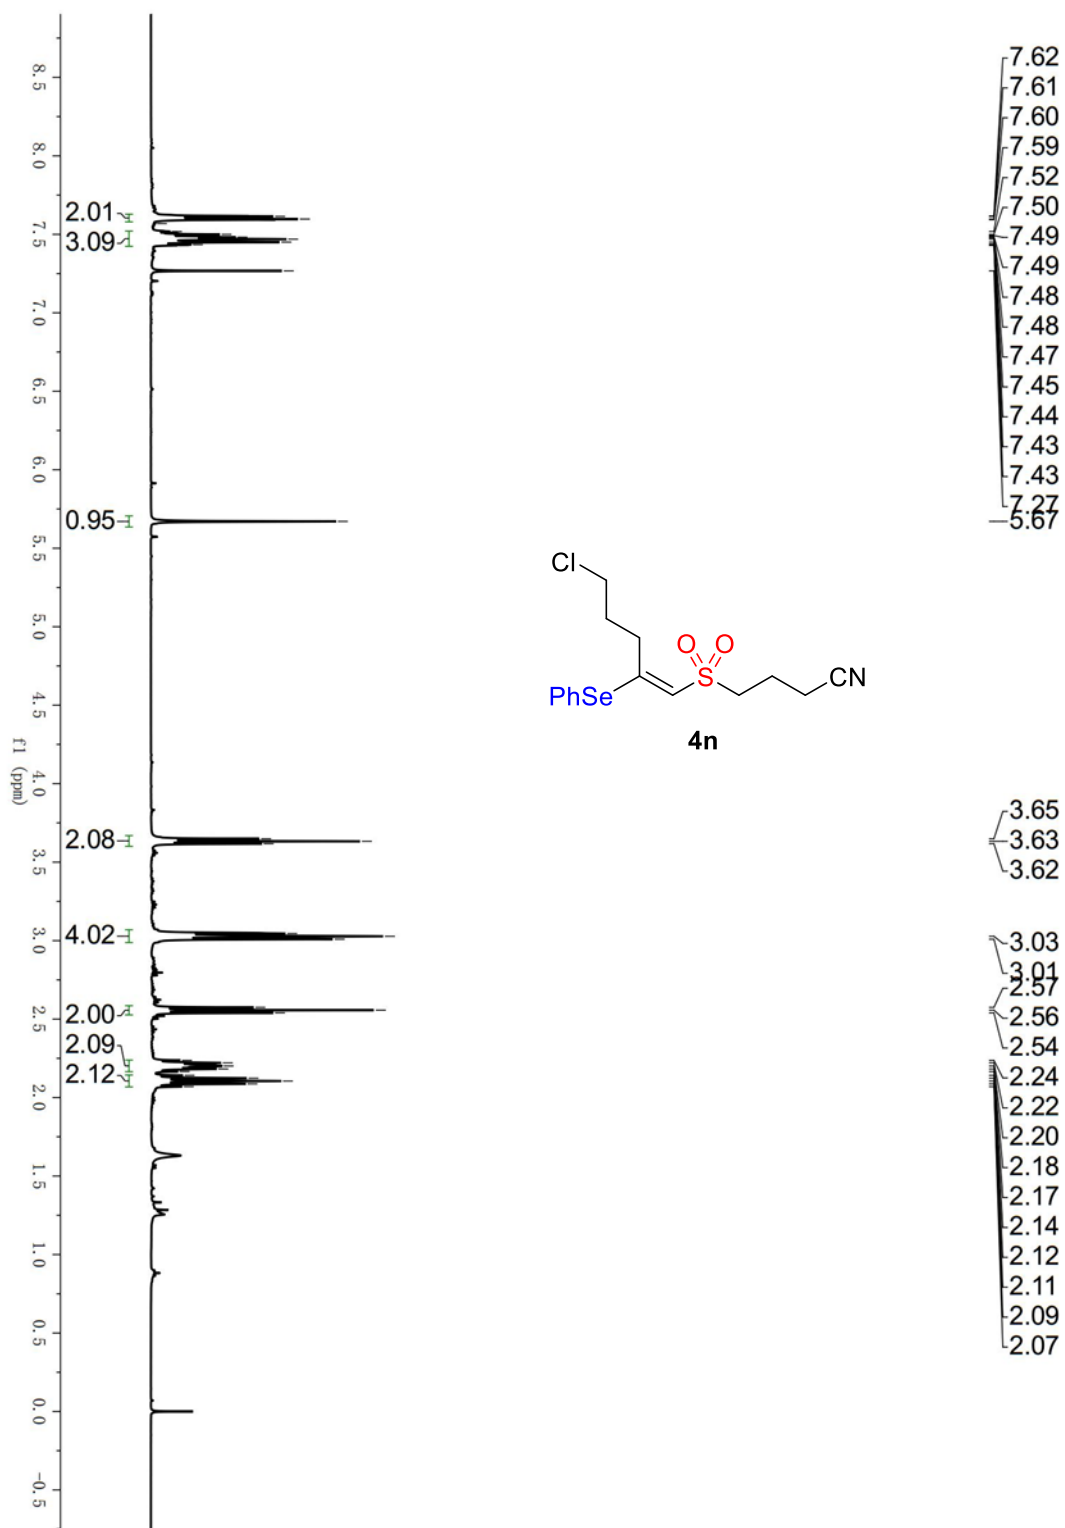

$^{13}\text{C}$  NMR spectrum of compound **4n** (100 MHz,  $\text{CDCl}_3$ )

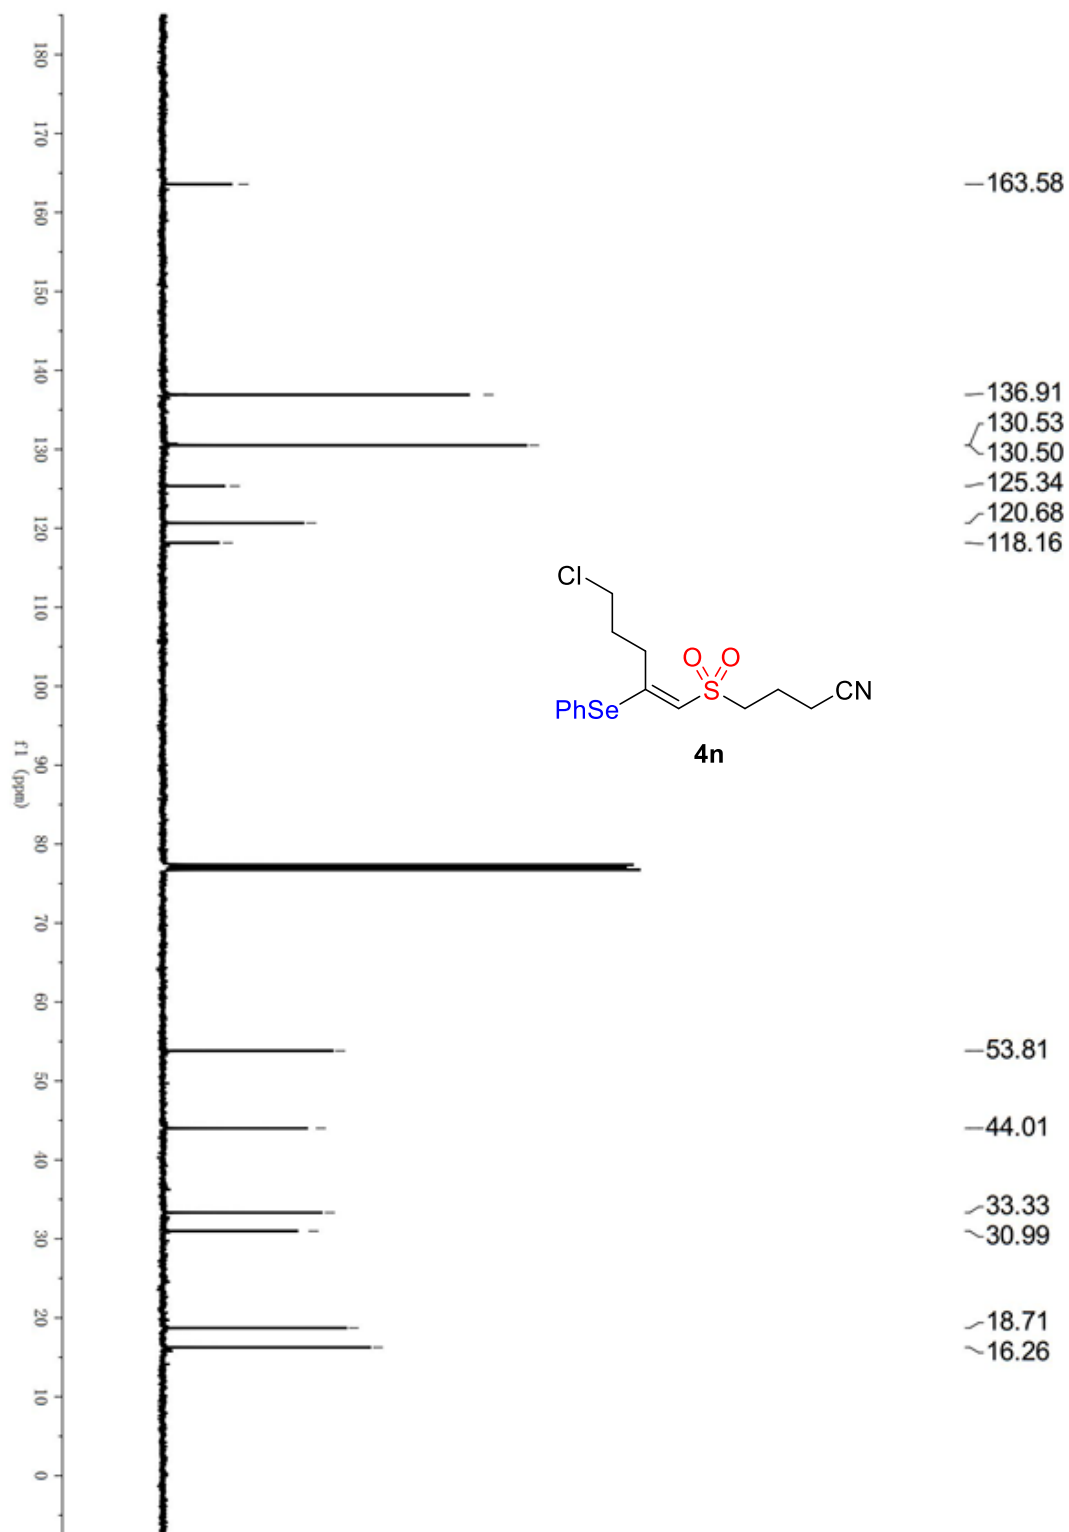

$^1\text{H}$  NMR spectrum of compound **4o** (400 MHz,  $\text{CDCl}_3$ )

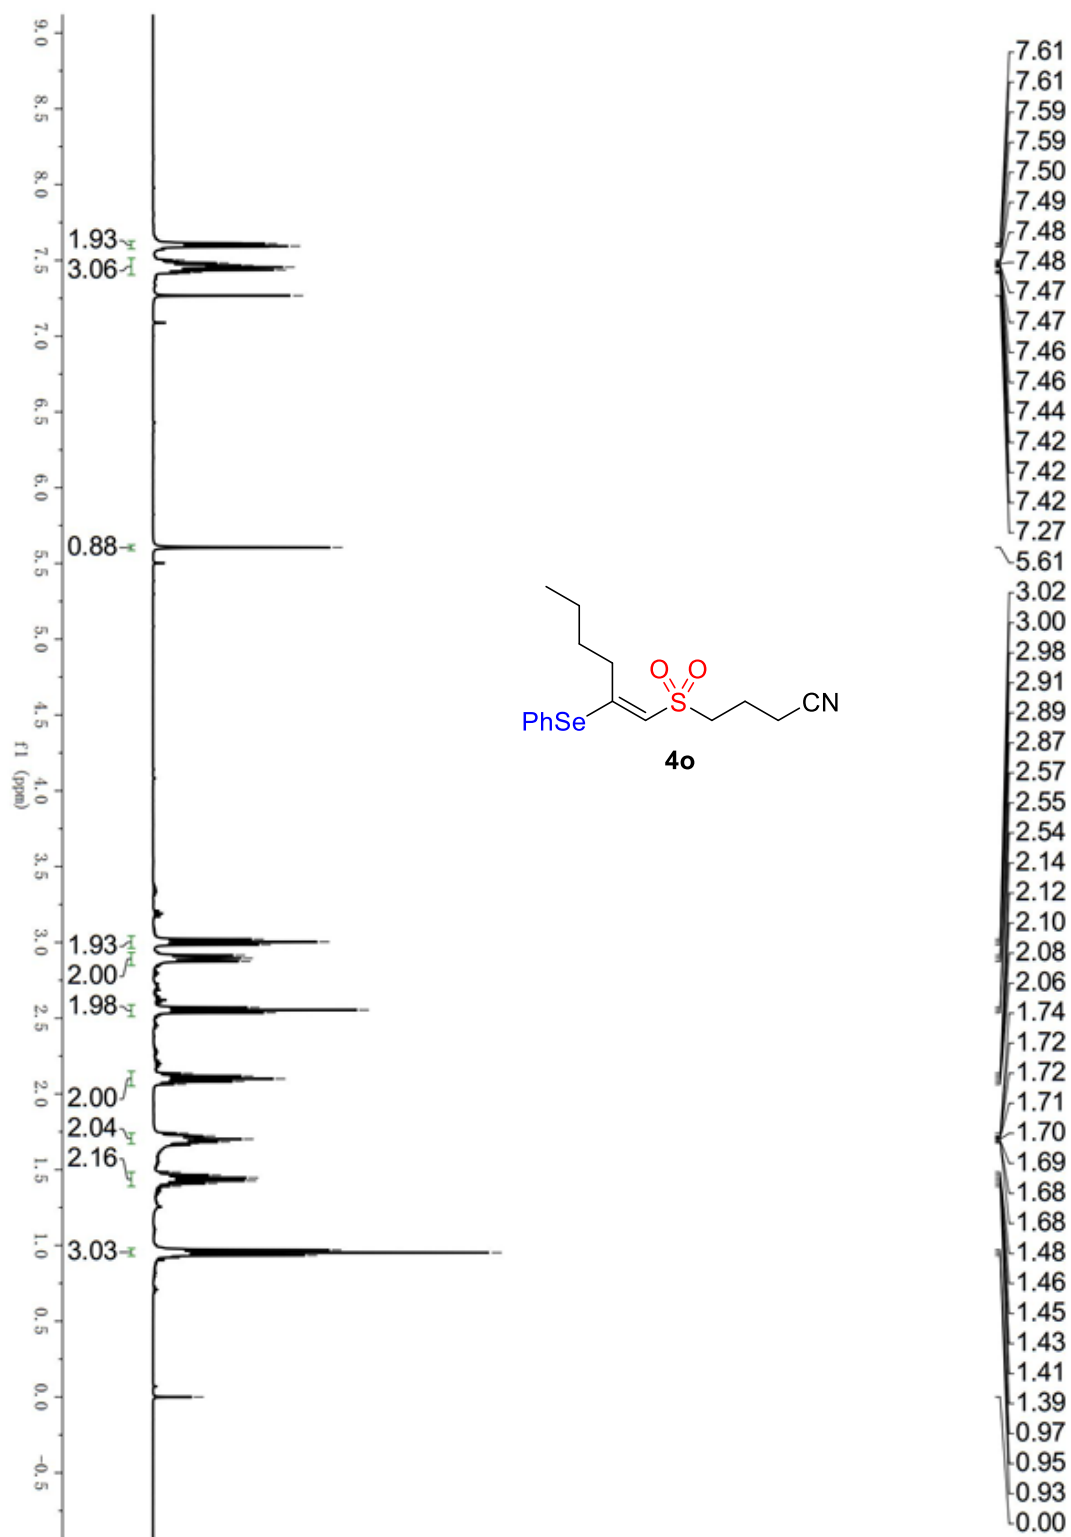

$^{13}\text{C}$  NMR spectrum of compound **4o** (100 MHz,  $\text{CDCl}_3$ )

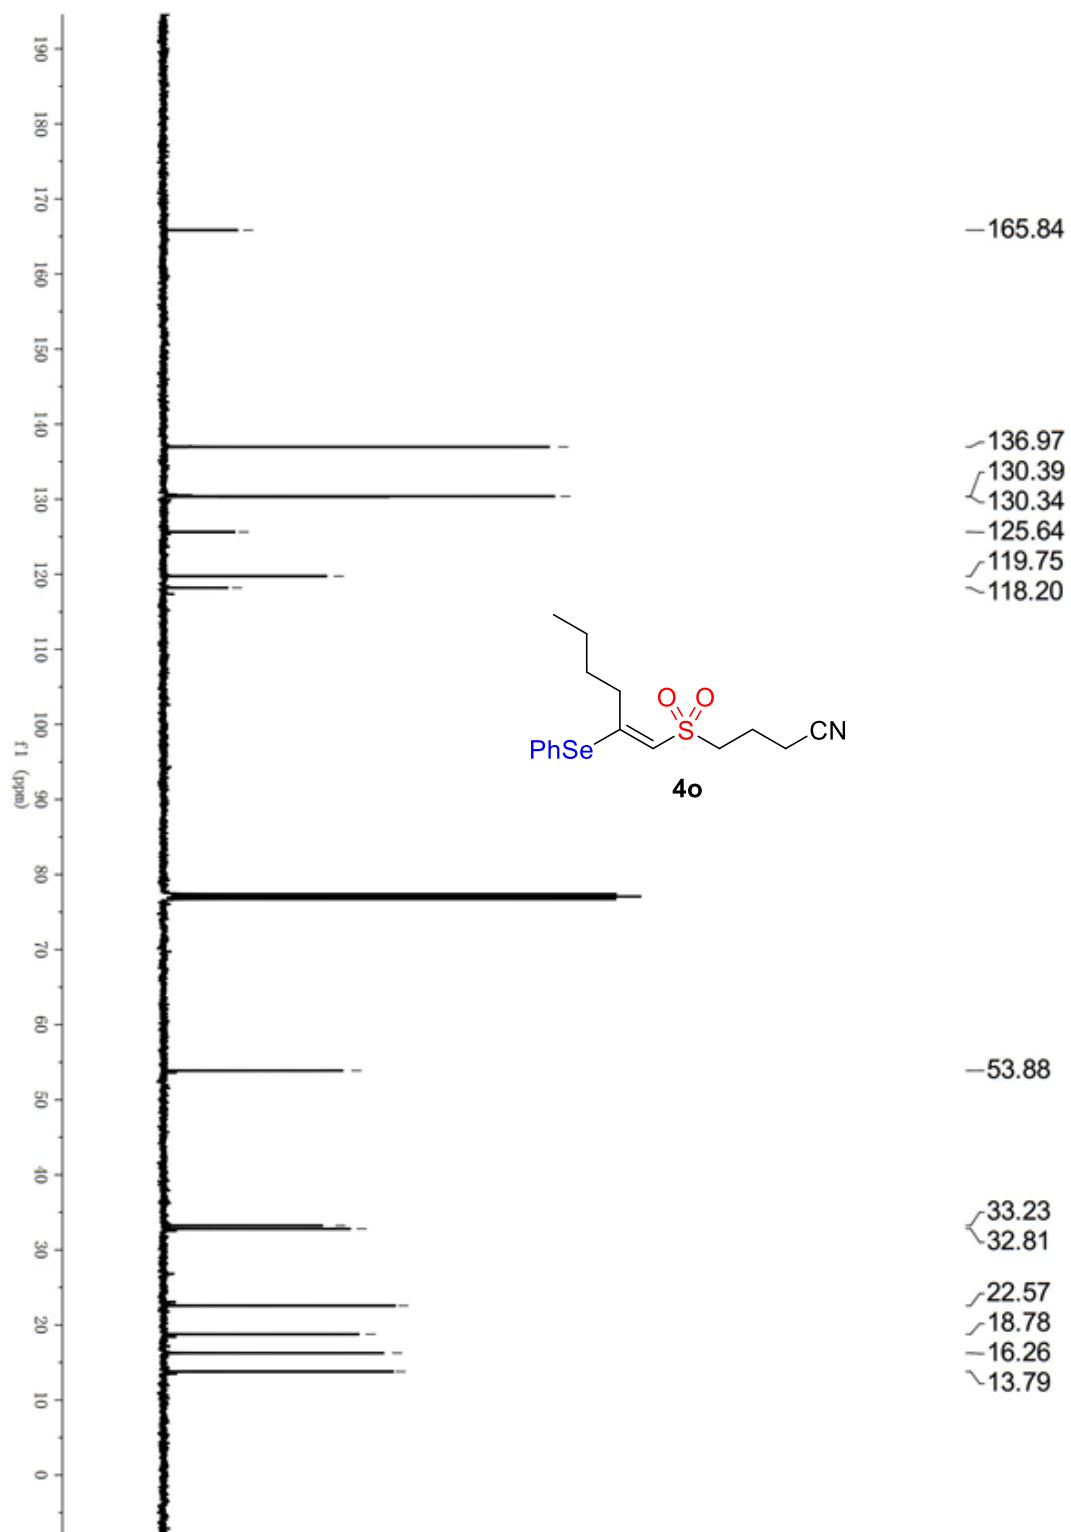



$^1\text{H}$  NMR spectrum of compound **4p** (400 MHz,  $\text{CDCl}_3$ )

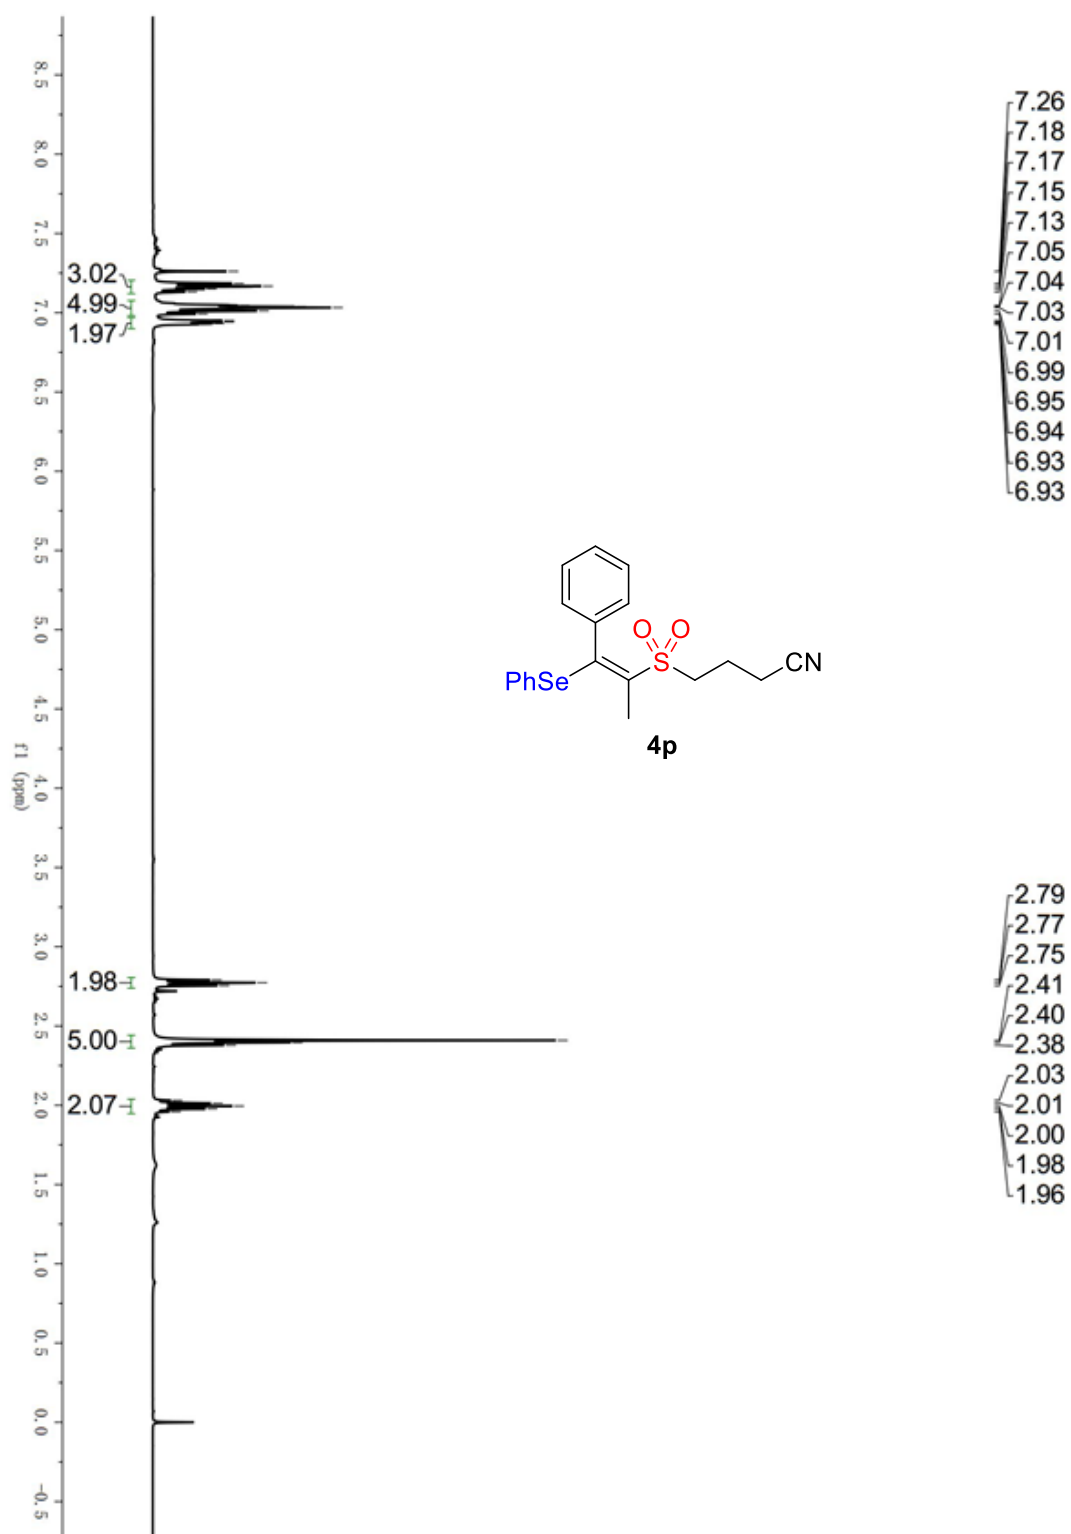

$^{13}\text{C}$  NMR spectrum of compound **4p** (100 MHz,  $\text{CDCl}_3$ )

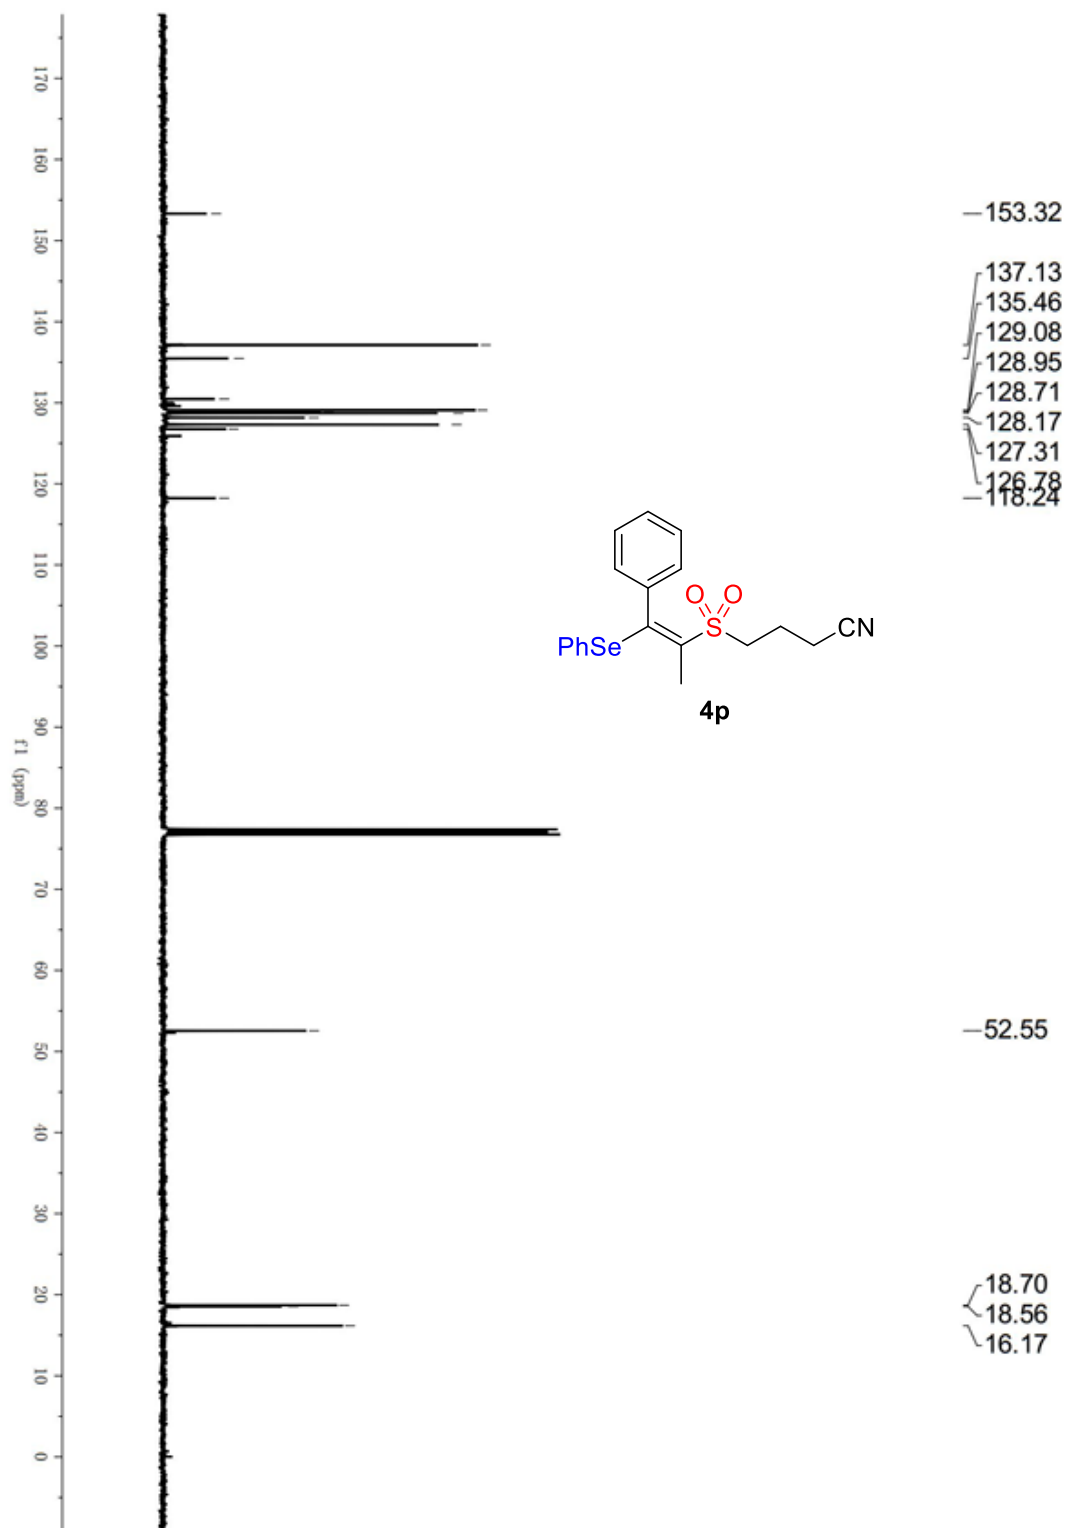

$^1\text{H}$  NMR spectrum of compound **4q** (400 MHz,  $\text{CDCl}_3$ )

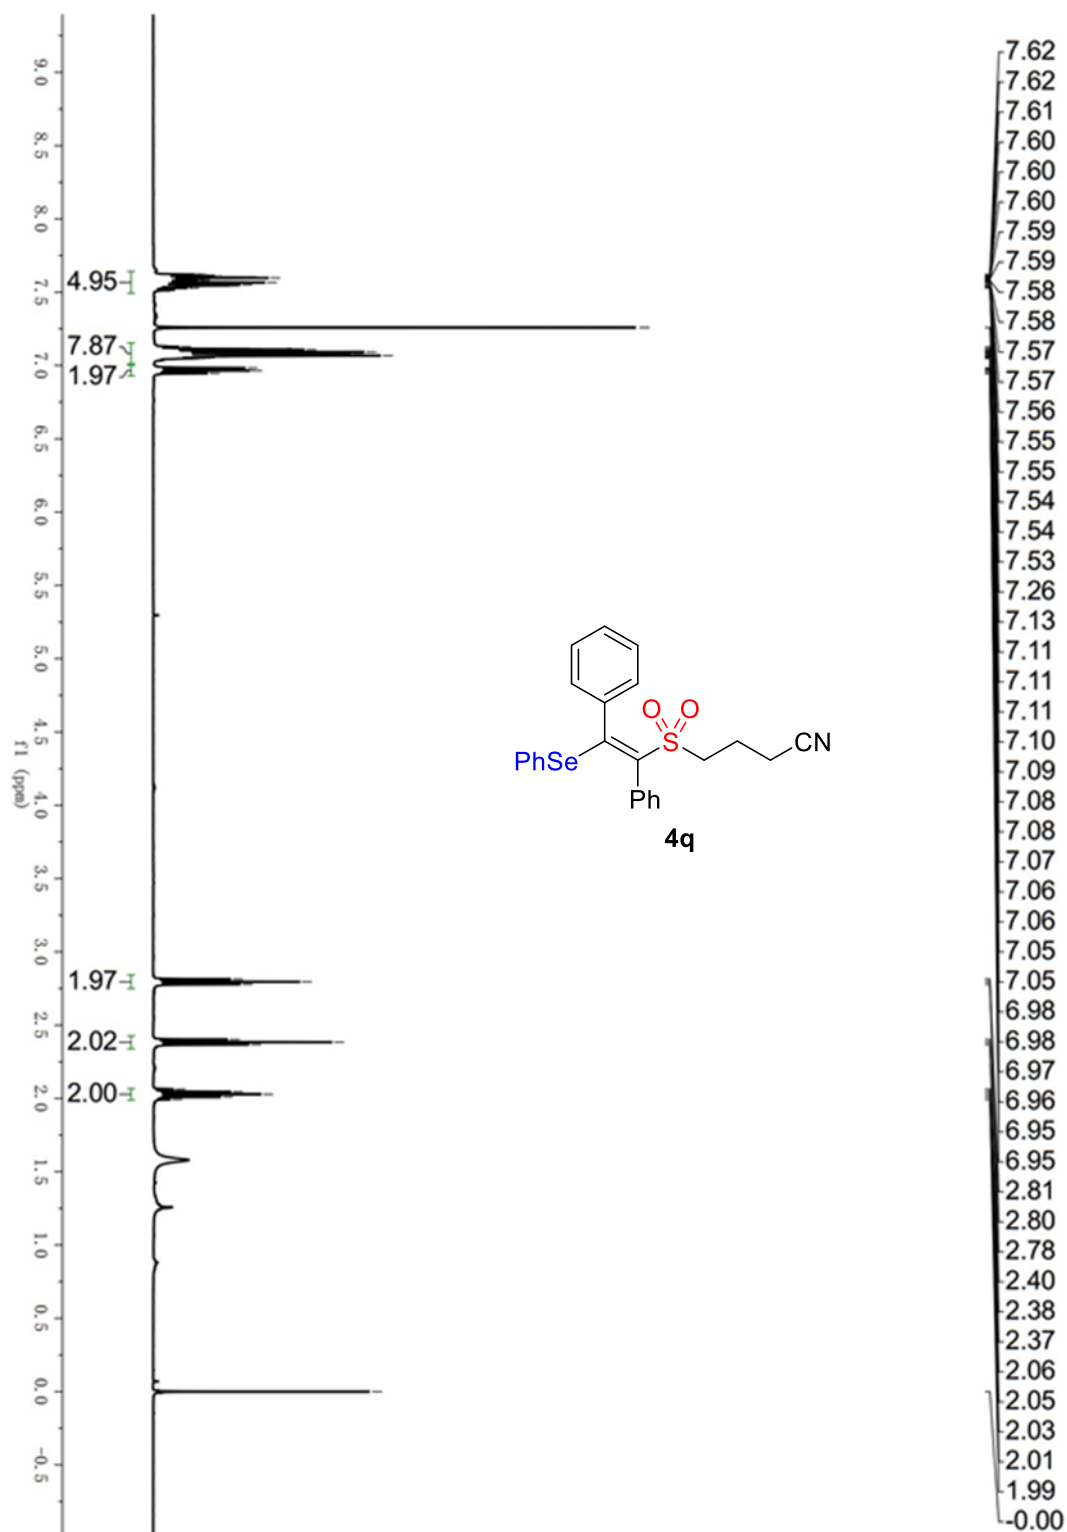

$^{13}\text{C}$  NMR spectrum of compound **4q** (100 MHz,  $\text{CDCl}_3$ )

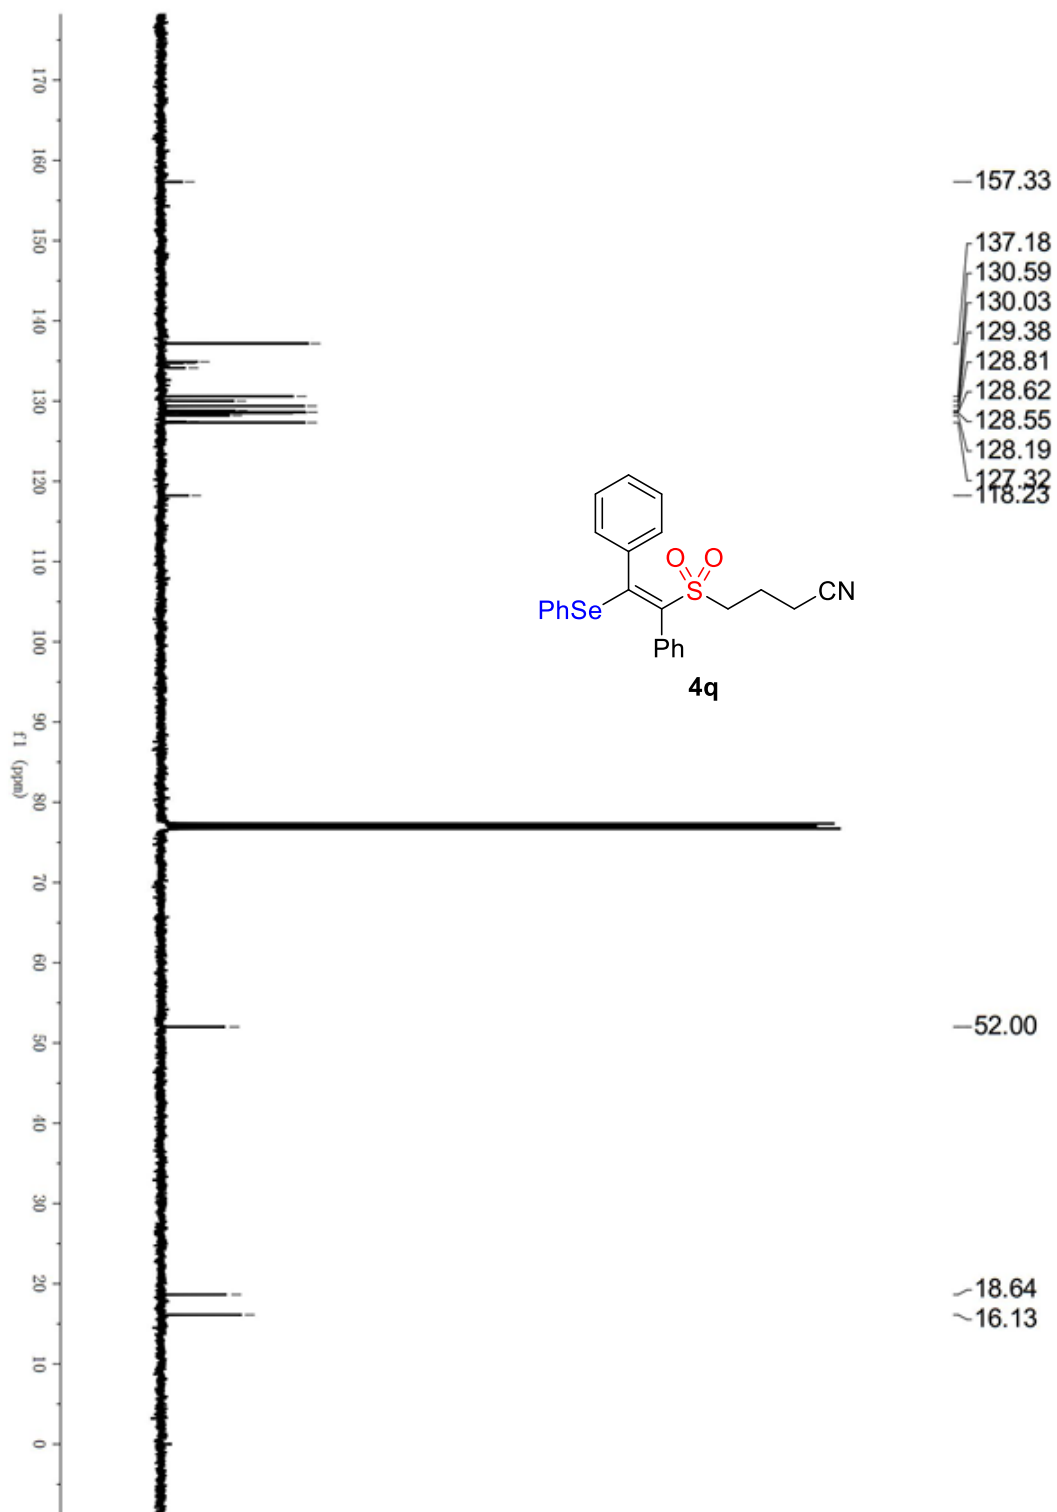

$^1\text{H}$  NMR spectrum of compound **4r** (400 MHz,  $\text{CDCl}_3$ )

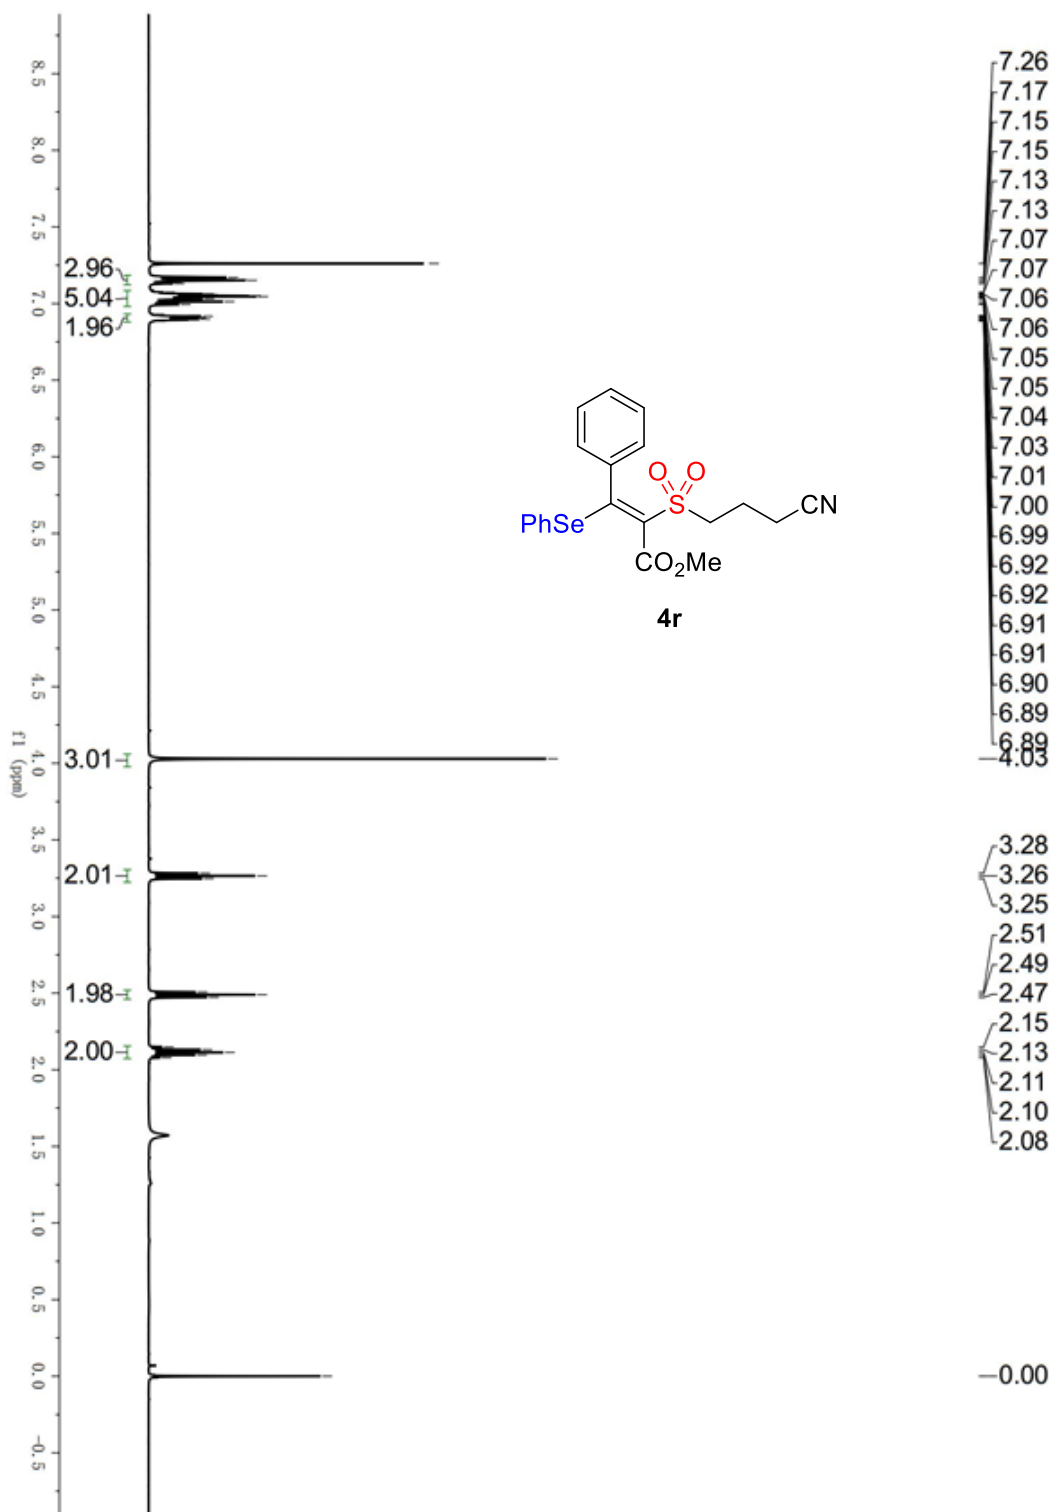

$^{13}\text{C}$  NMR spectrum of compound **4r** (100 MHz,  $\text{CDCl}_3$ )

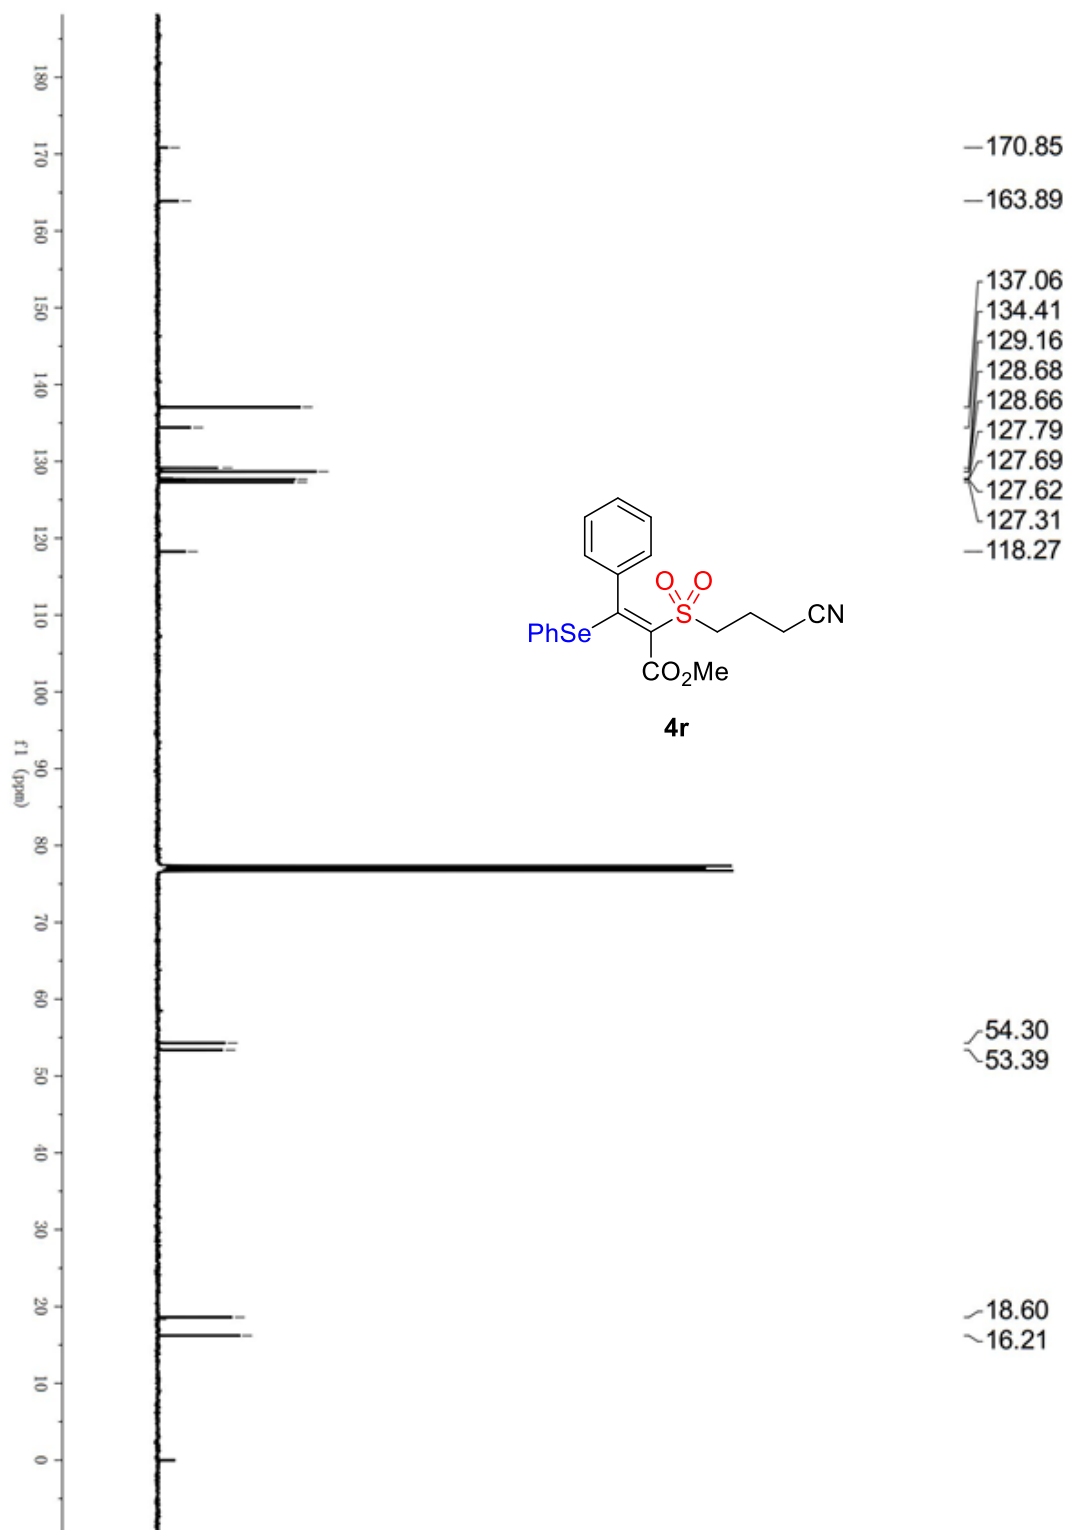

$^1\text{H}$  NMR spectrum of compound **5a** (400 MHz,  $\text{CDCl}_3$ )

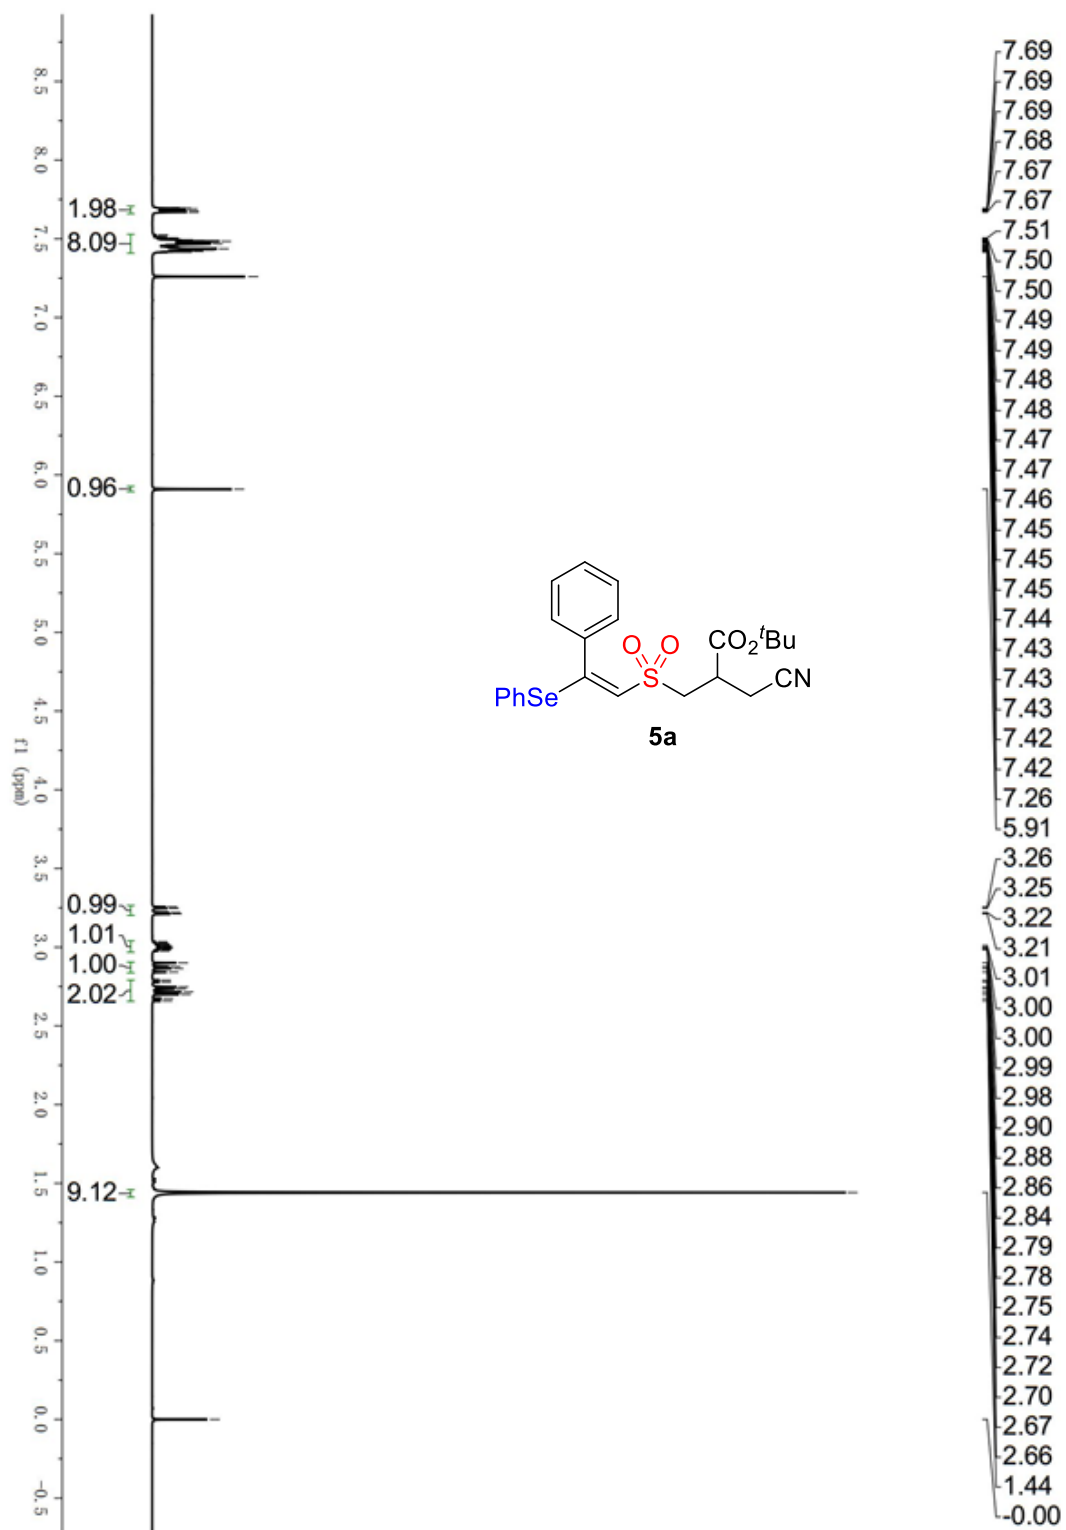

$^{13}\text{C}$  NMR spectrum of compound **5a** (100 MHz,  $\text{CDCl}_3$ )

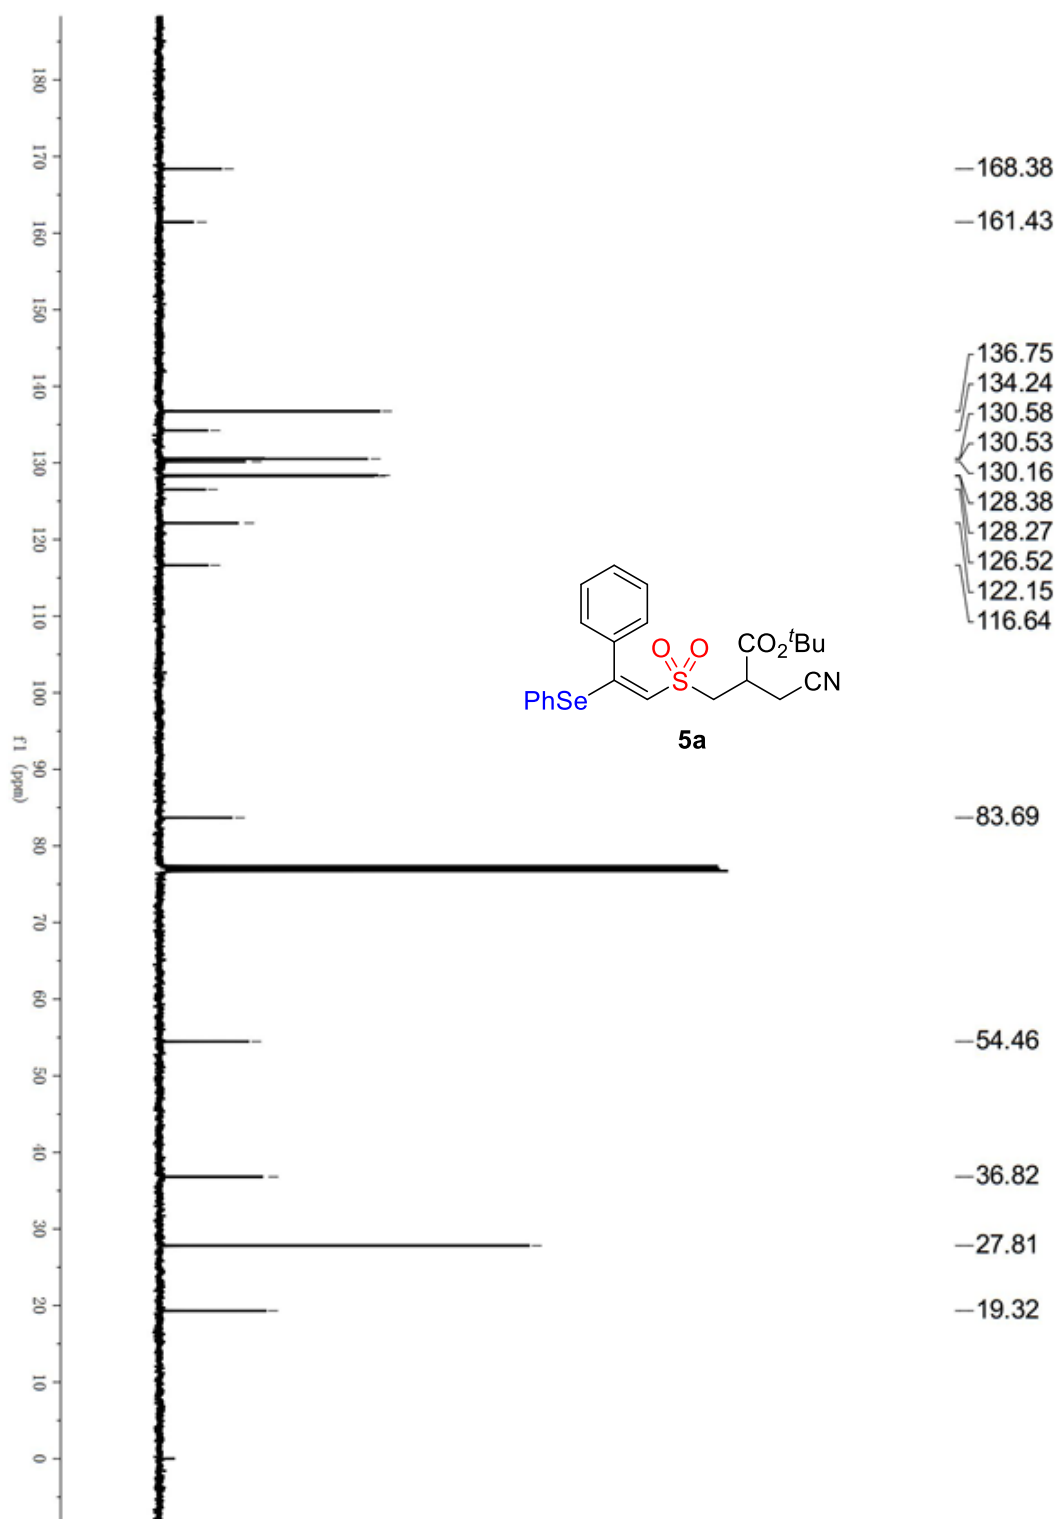



$^1\text{H}$  NMR spectrum of compound **5b** (400 MHz,  $\text{CDCl}_3$ )

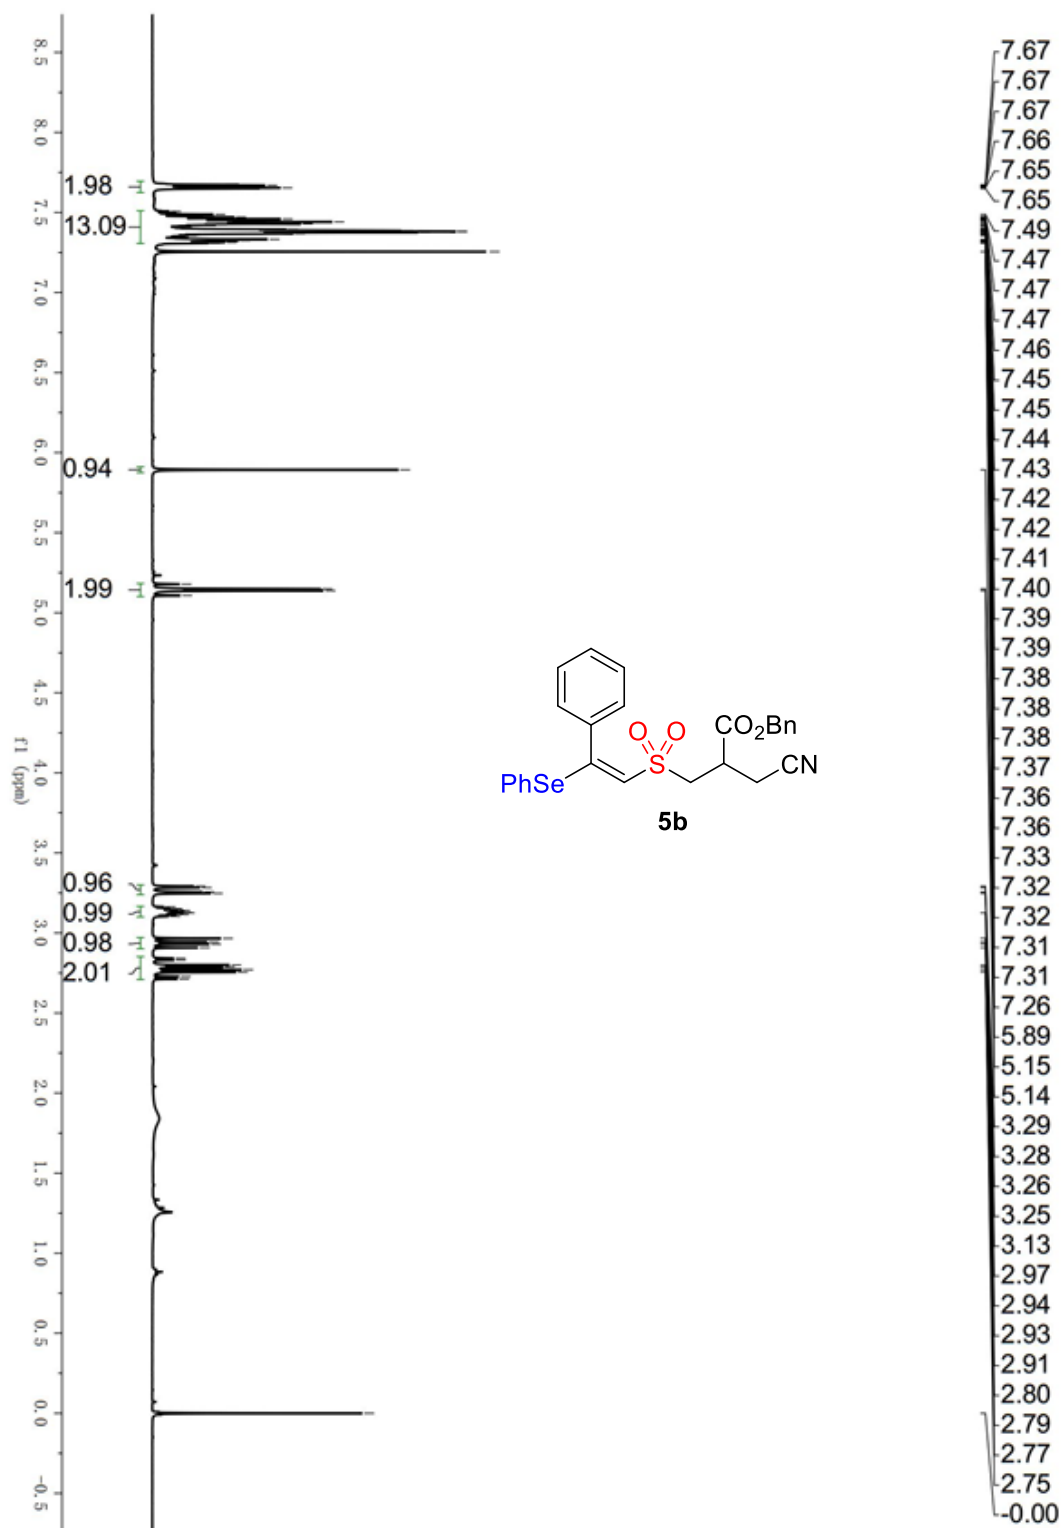

$^{13}\text{C}$  NMR spectrum of compound **5b** (100 MHz,  $\text{CDCl}_3$ )

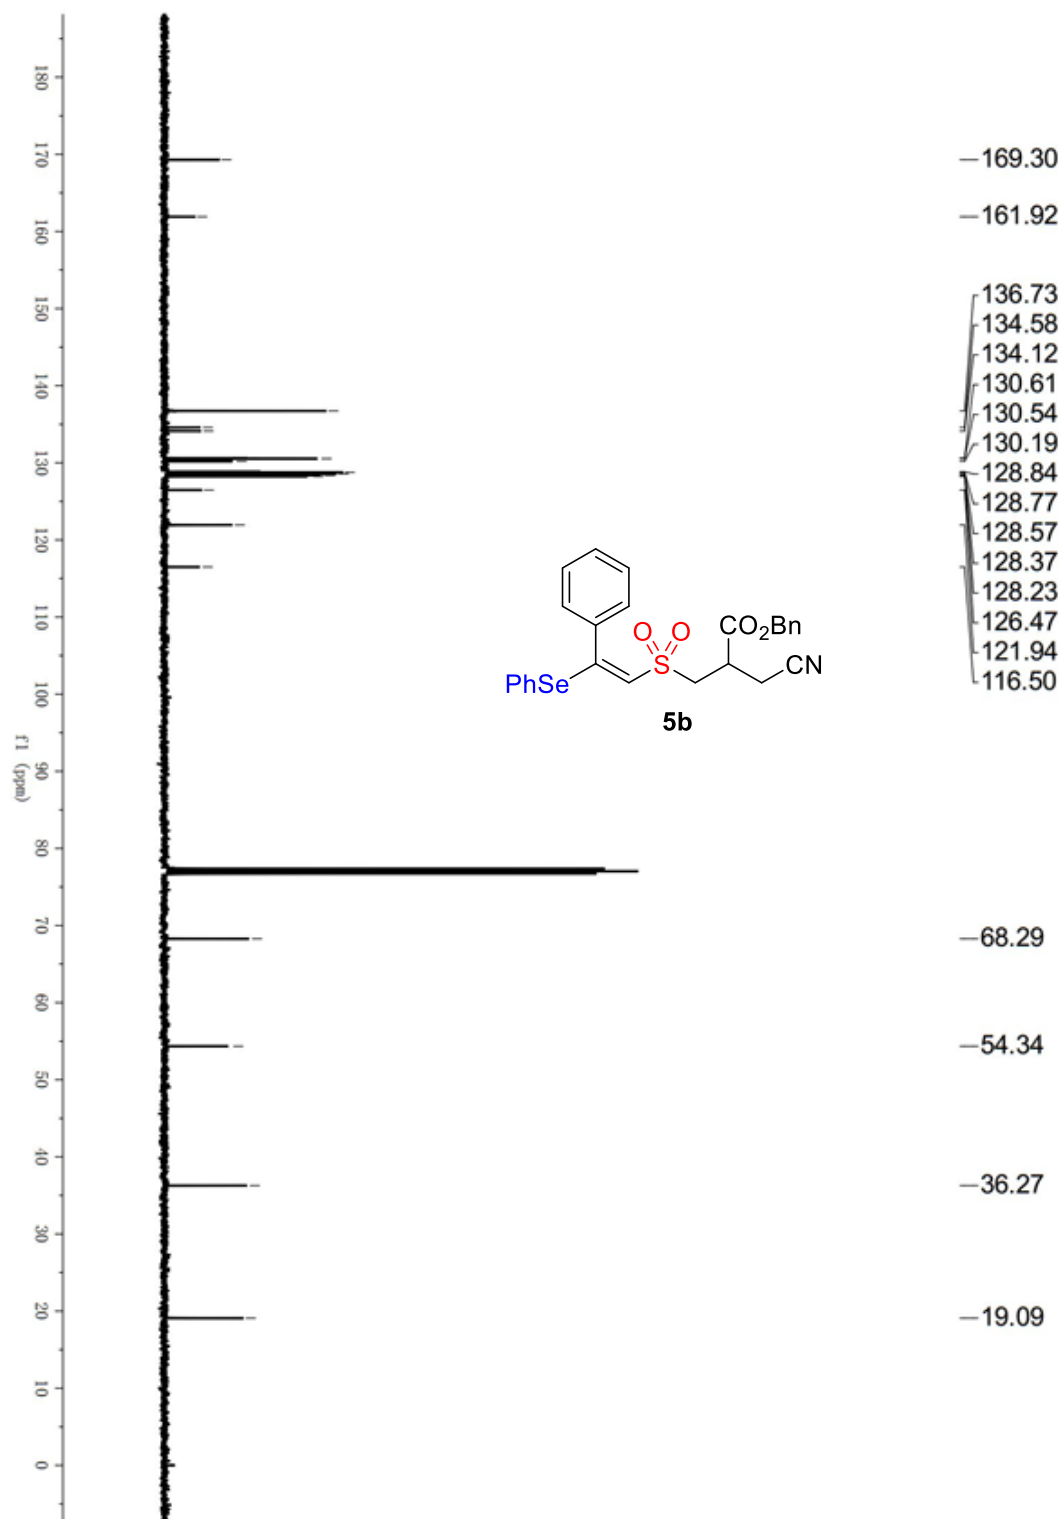

$^1\text{H}$  NMR spectrum of compound **5c** (400 MHz,  $\text{CDCl}_3$ )

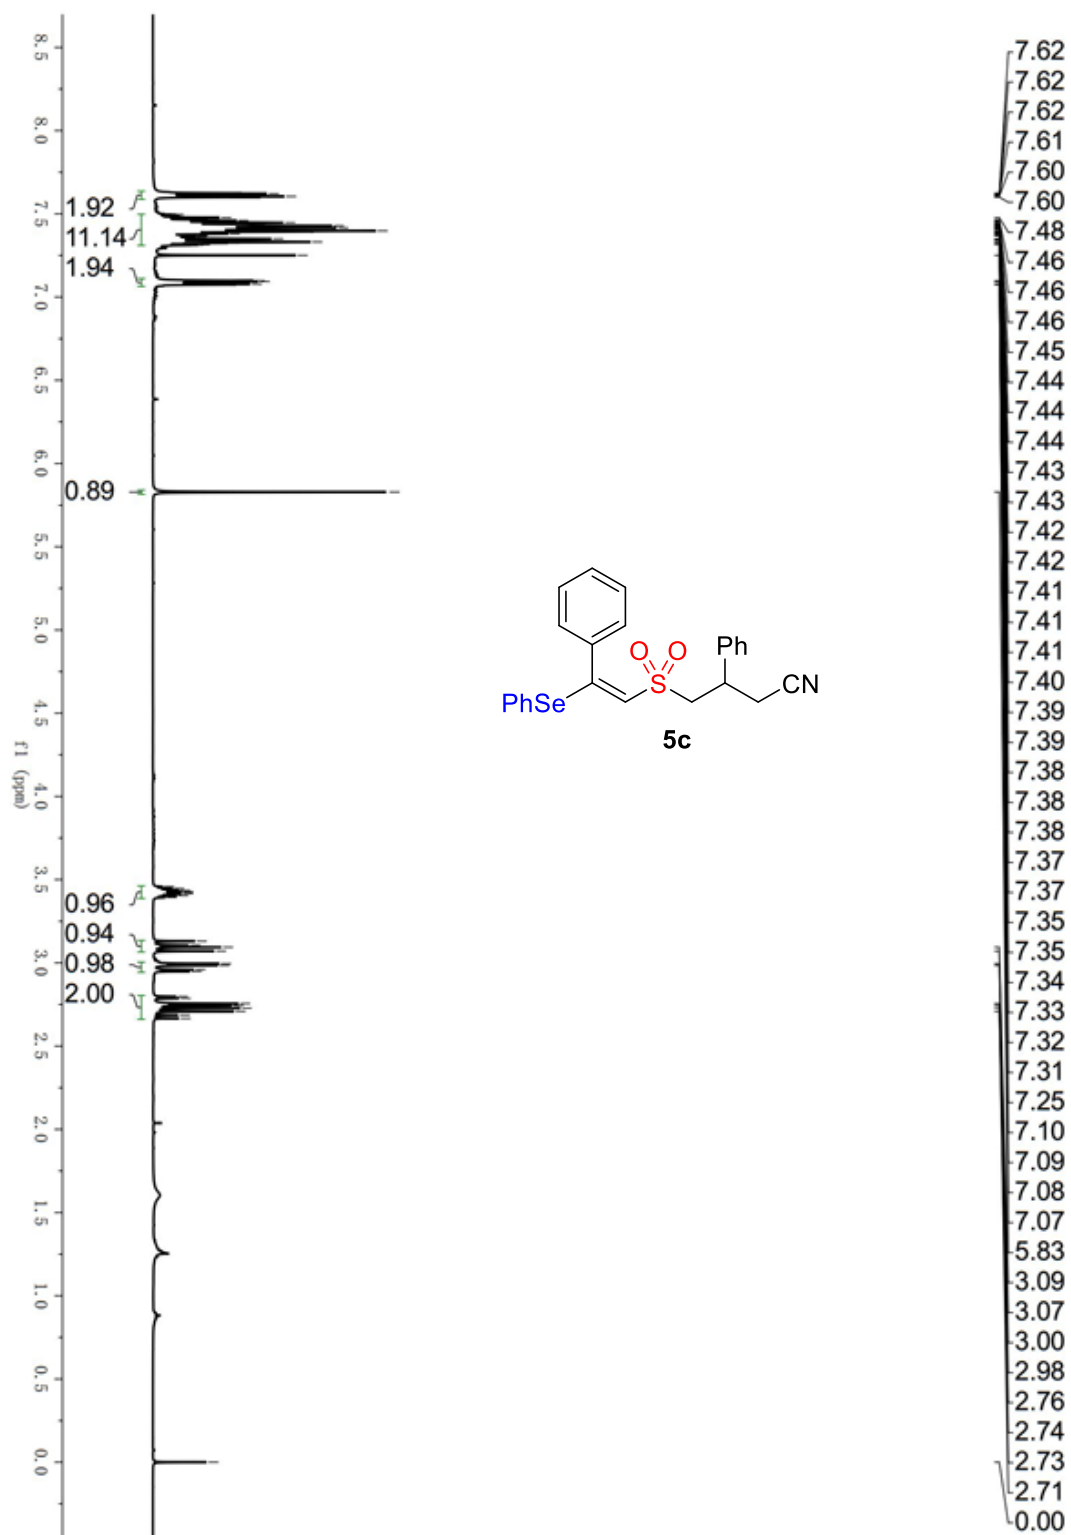

$^{13}\text{C}$  NMR spectrum of compound **5c** (100 MHz,  $\text{CDCl}_3$ )

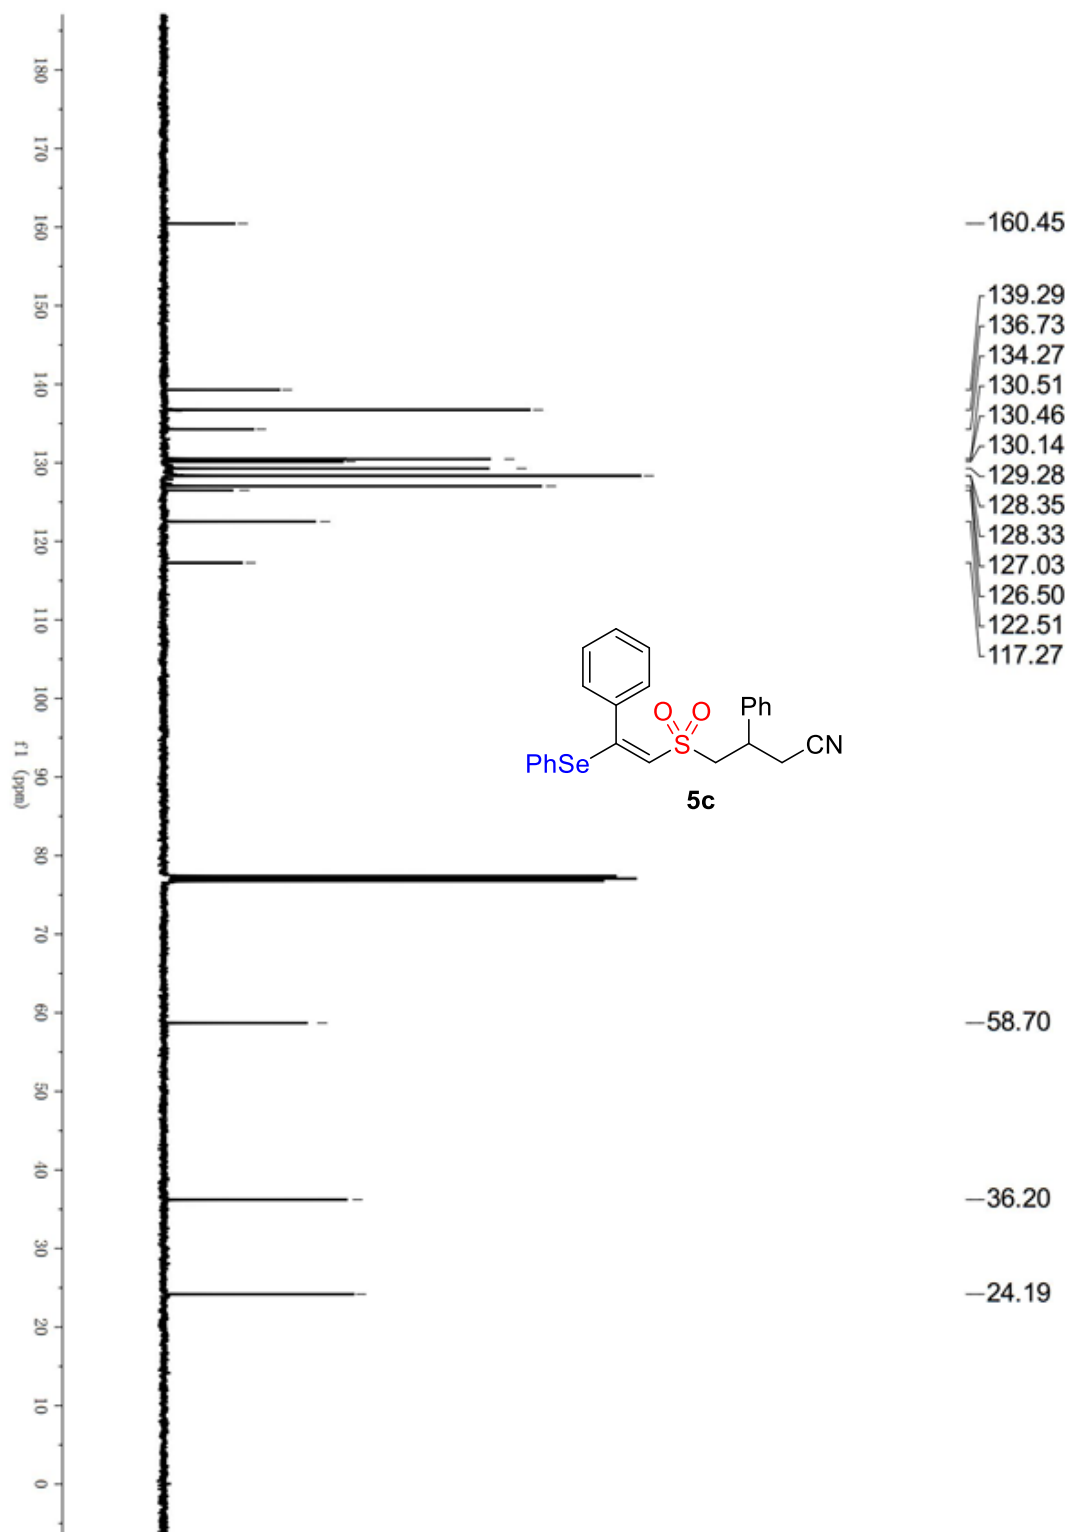

$^1\text{H}$  NMR spectrum of compound **5d** (400 MHz,  $\text{CDCl}_3$ )

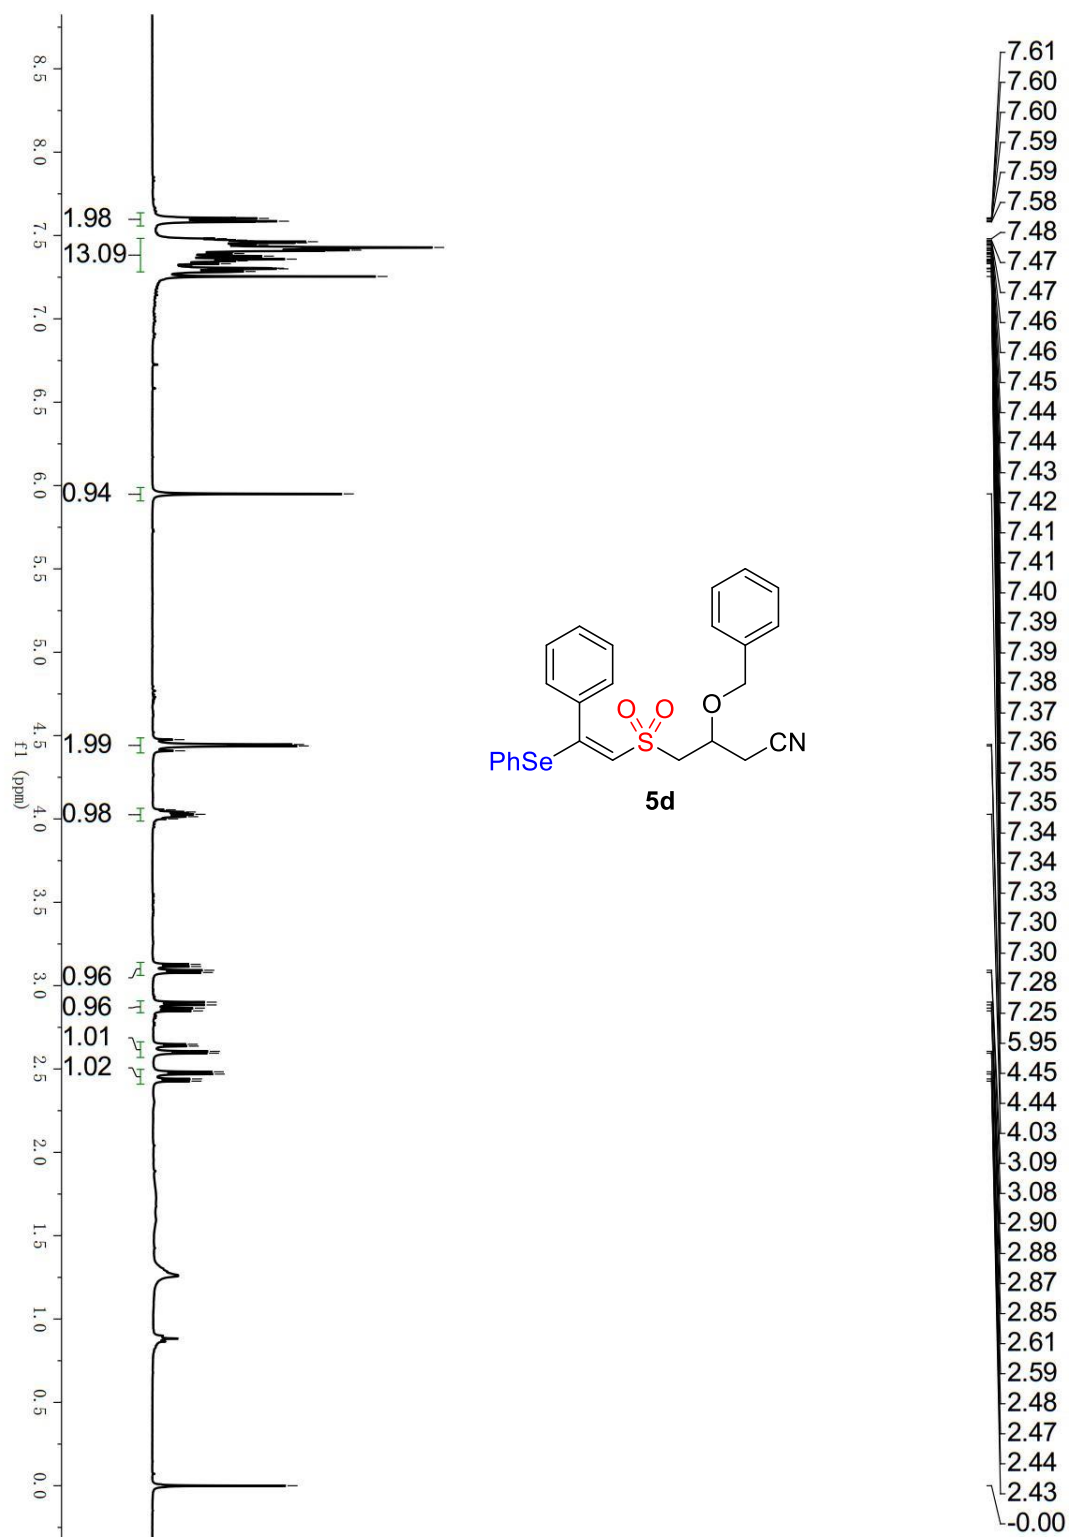

$^{13}\text{C}$  NMR spectrum of compound **5d** (100 MHz,  $\text{CDCl}_3$ )

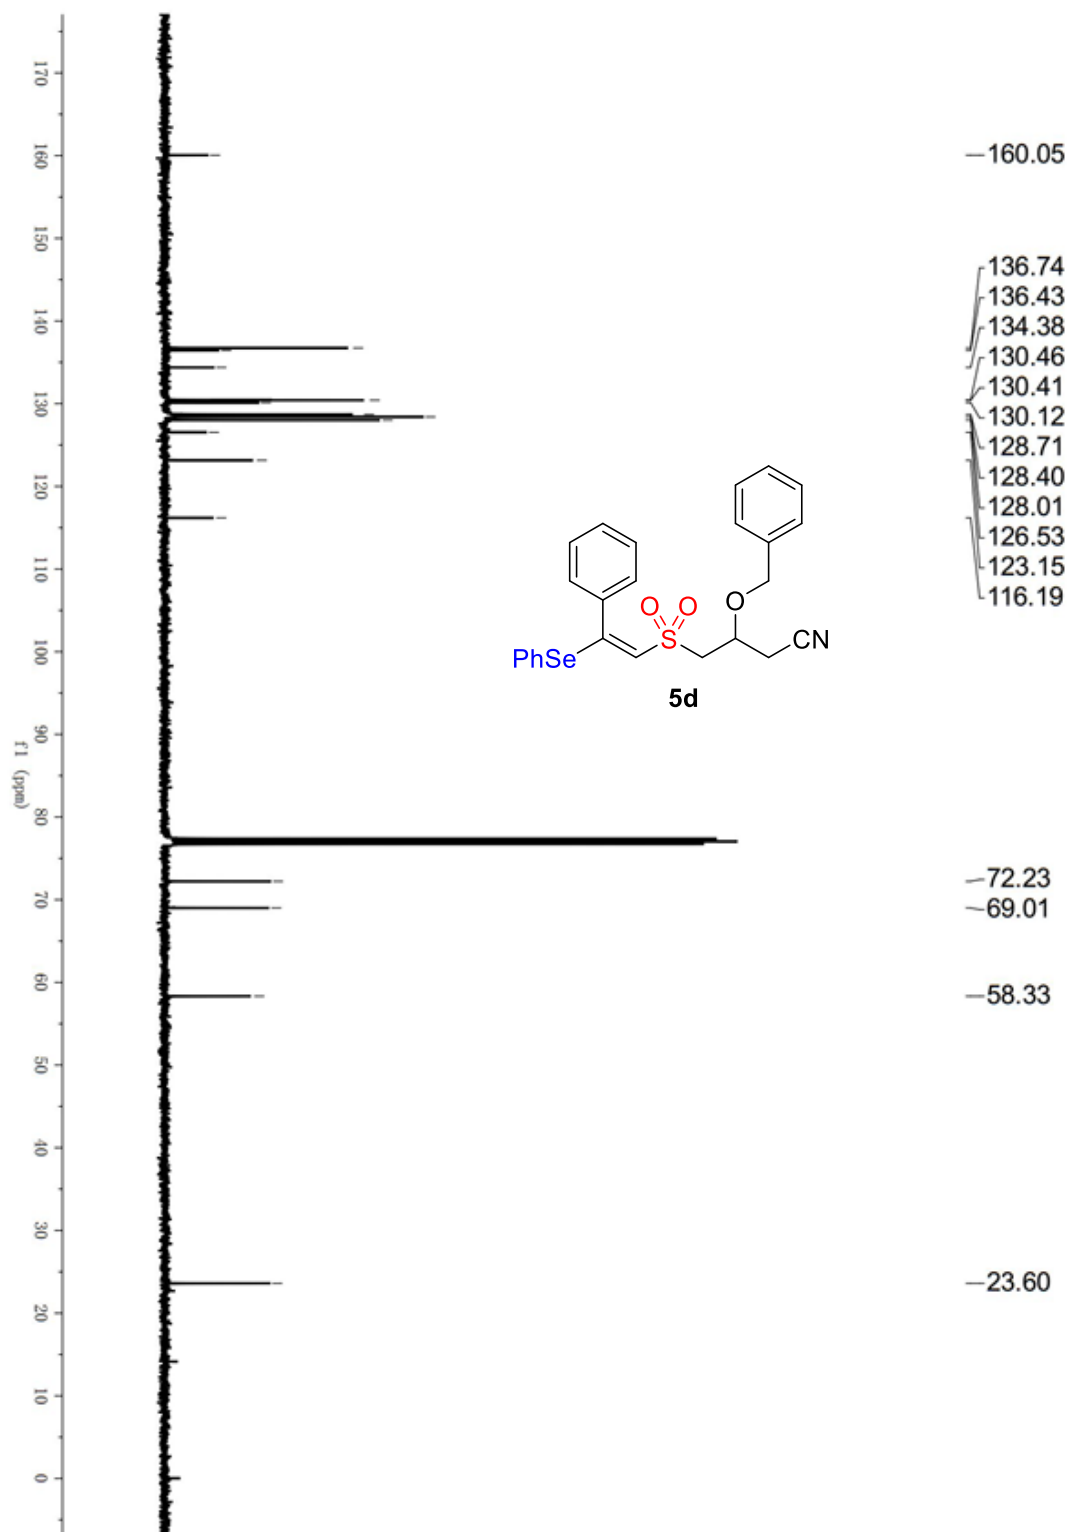

<sup>1</sup>H NMR spectrum of compound **5e** (400 MHz, CDCl<sub>3</sub>)

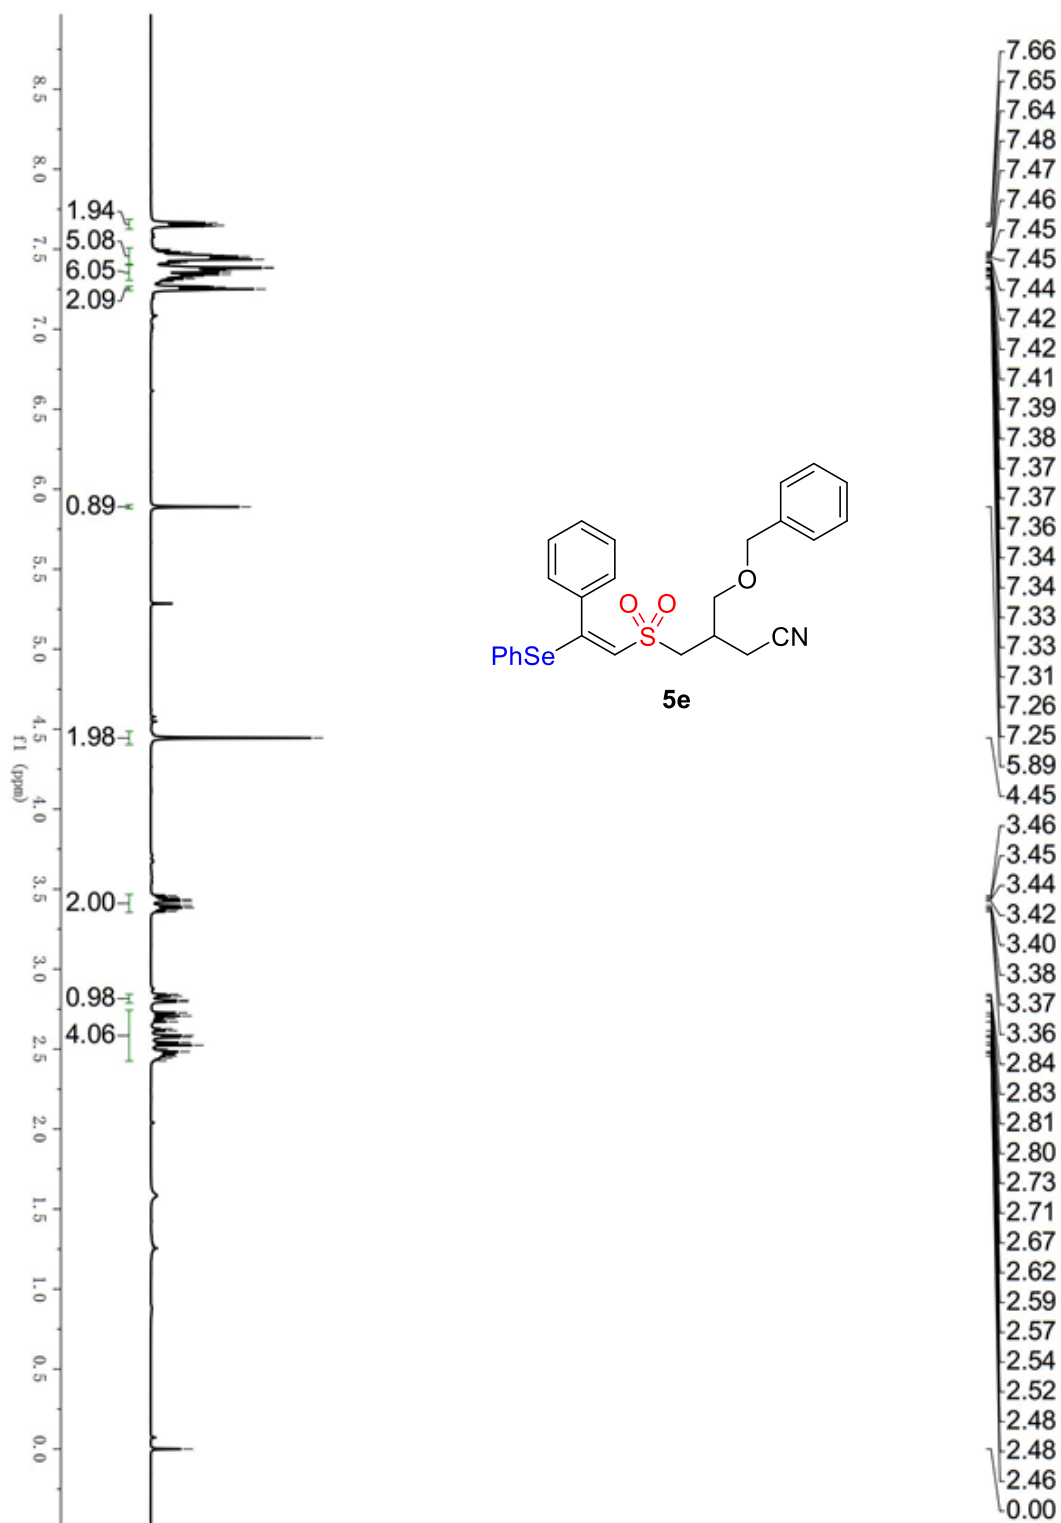

$^{13}\text{C}$  NMR spectrum of compound **5e** (100 MHz,  $\text{CDCl}_3$ )

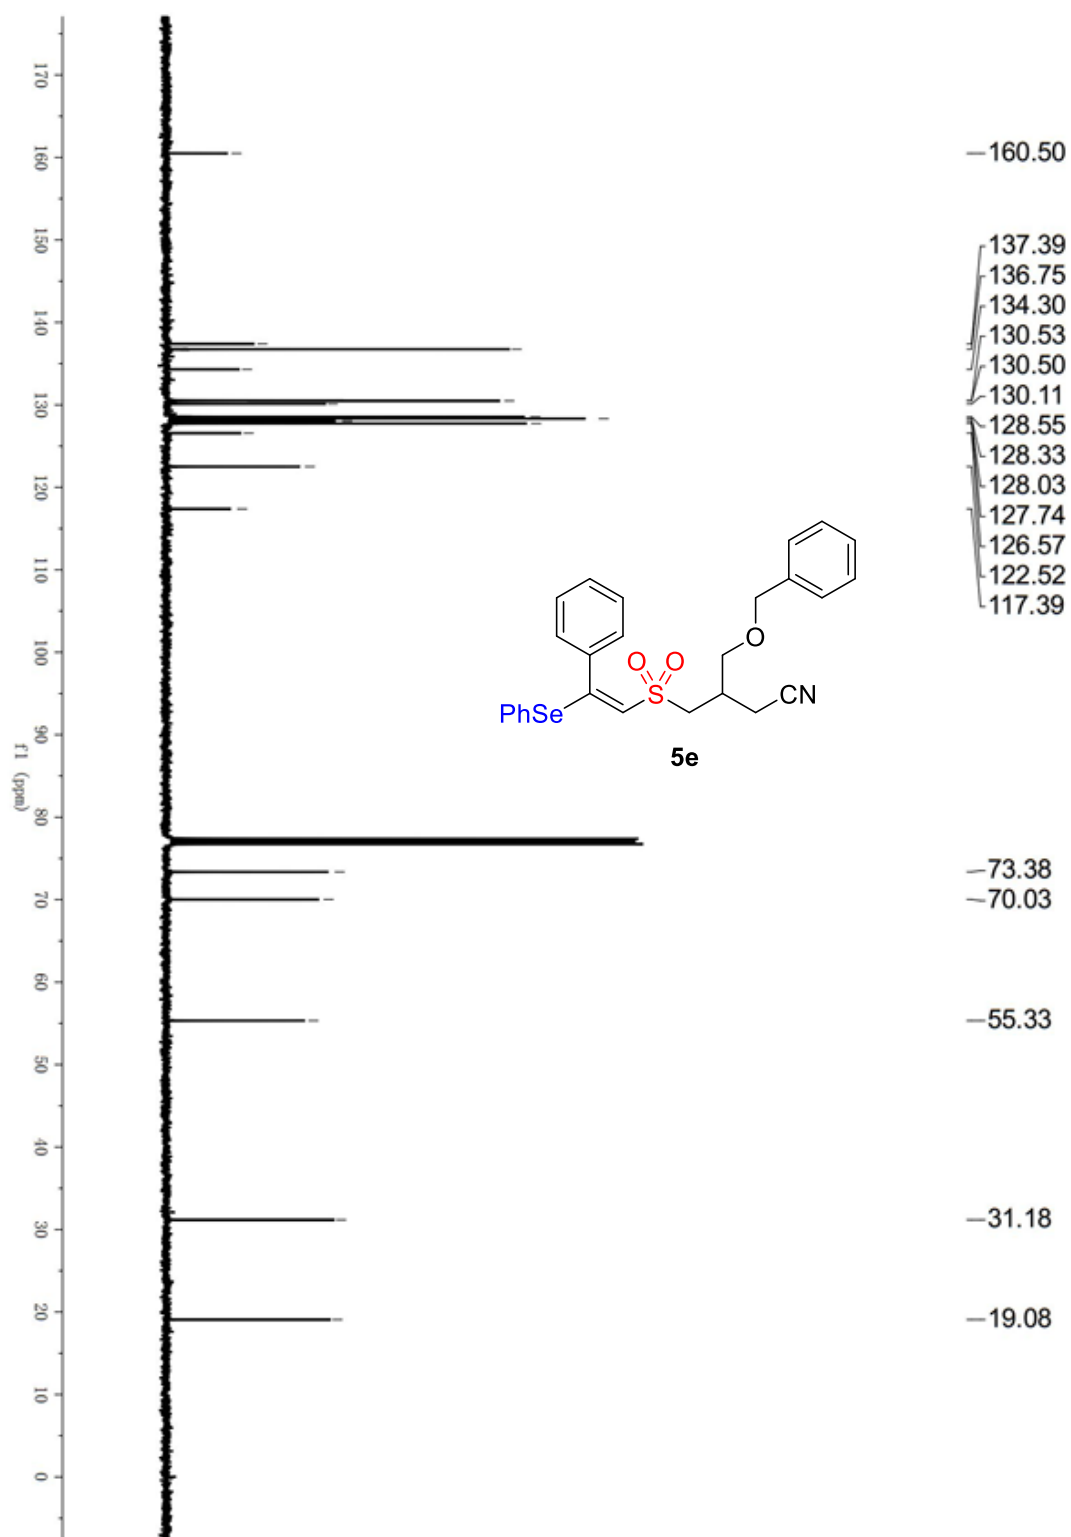



$^1\text{H}$  NMR spectrum of compound **5f** (400 MHz,  $\text{CDCl}_3$ )

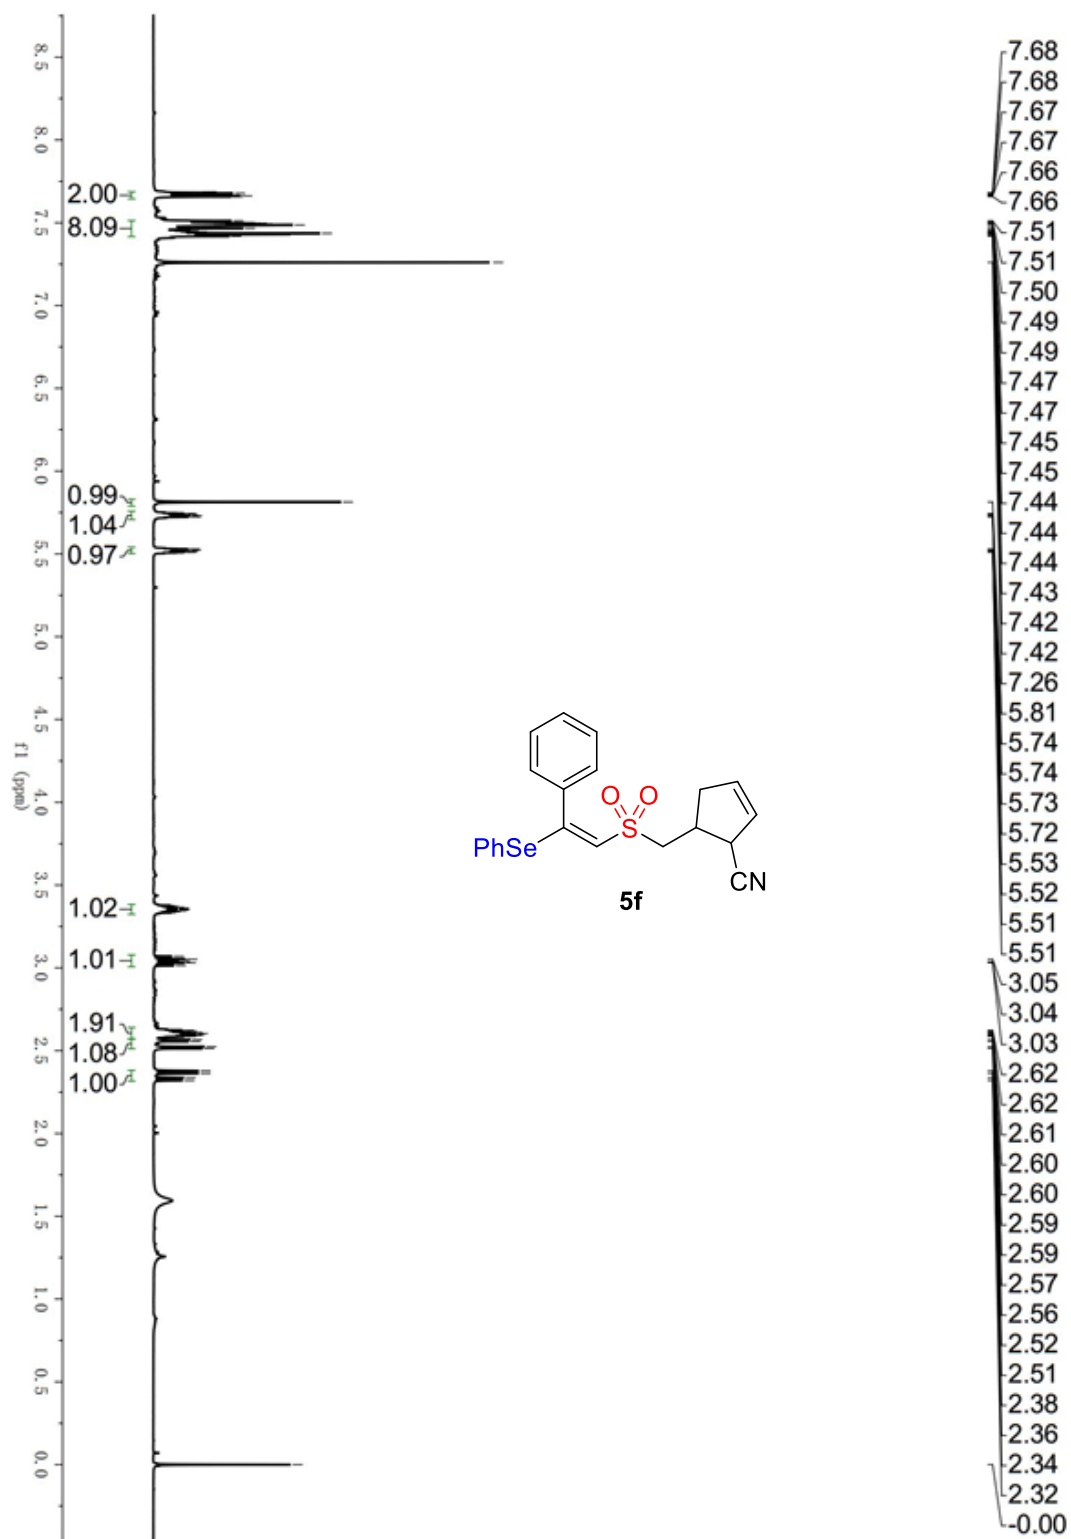

$^{13}\text{C}$  NMR spectrum of compound **5f** (100 MHz,  $\text{CDCl}_3$ )

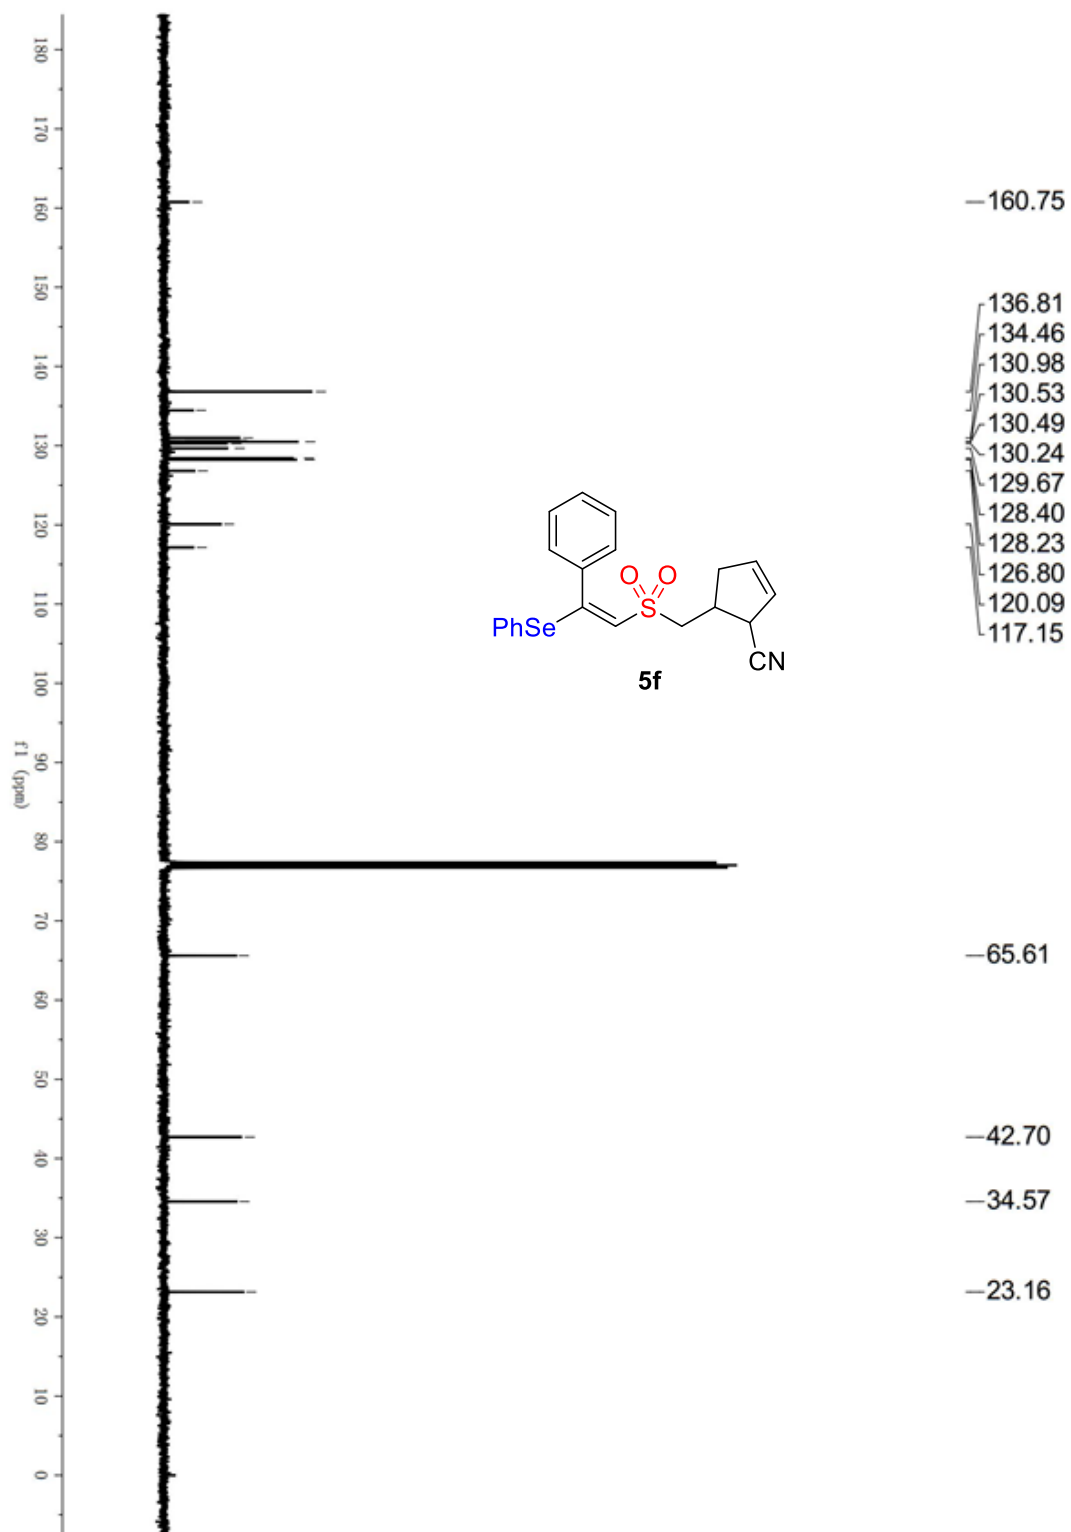

$^1\text{H}$  NMR spectrum of compound **5g** (400 MHz,  $\text{CDCl}_3$ )

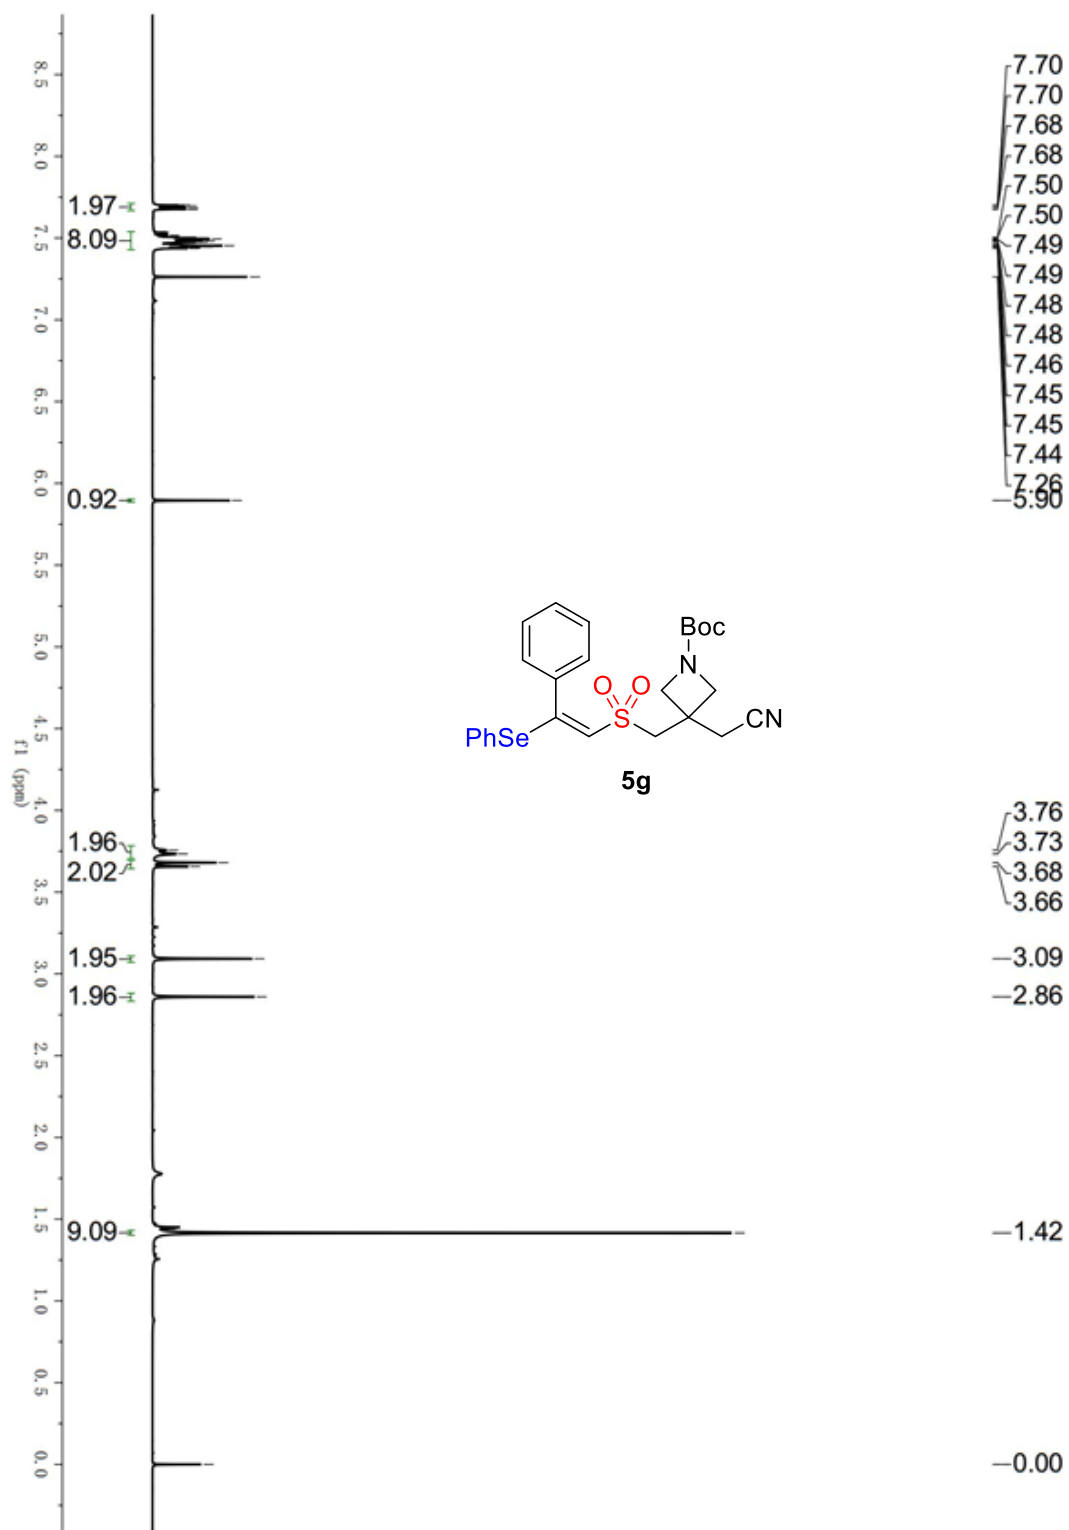

$^{13}\text{C}$  NMR spectrum of compound **5g** (100 MHz,  $\text{CDCl}_3$ )

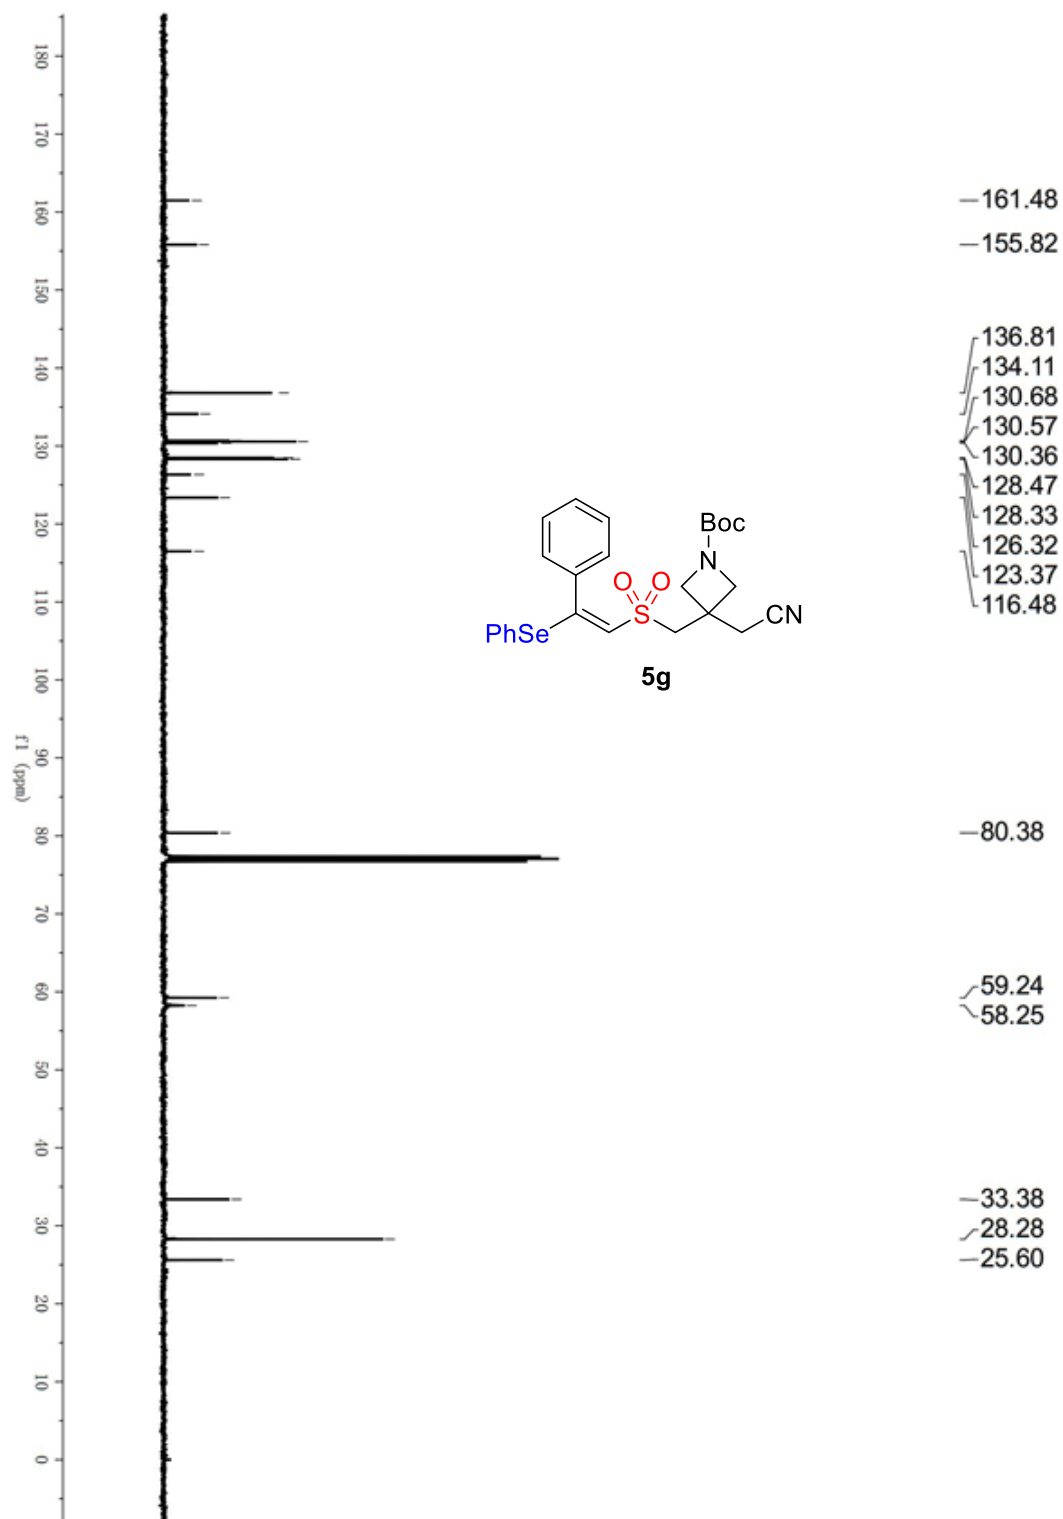

$^1\text{H}$  NMR spectrum of compound **5h** (400 MHz,  $\text{CDCl}_3$ )

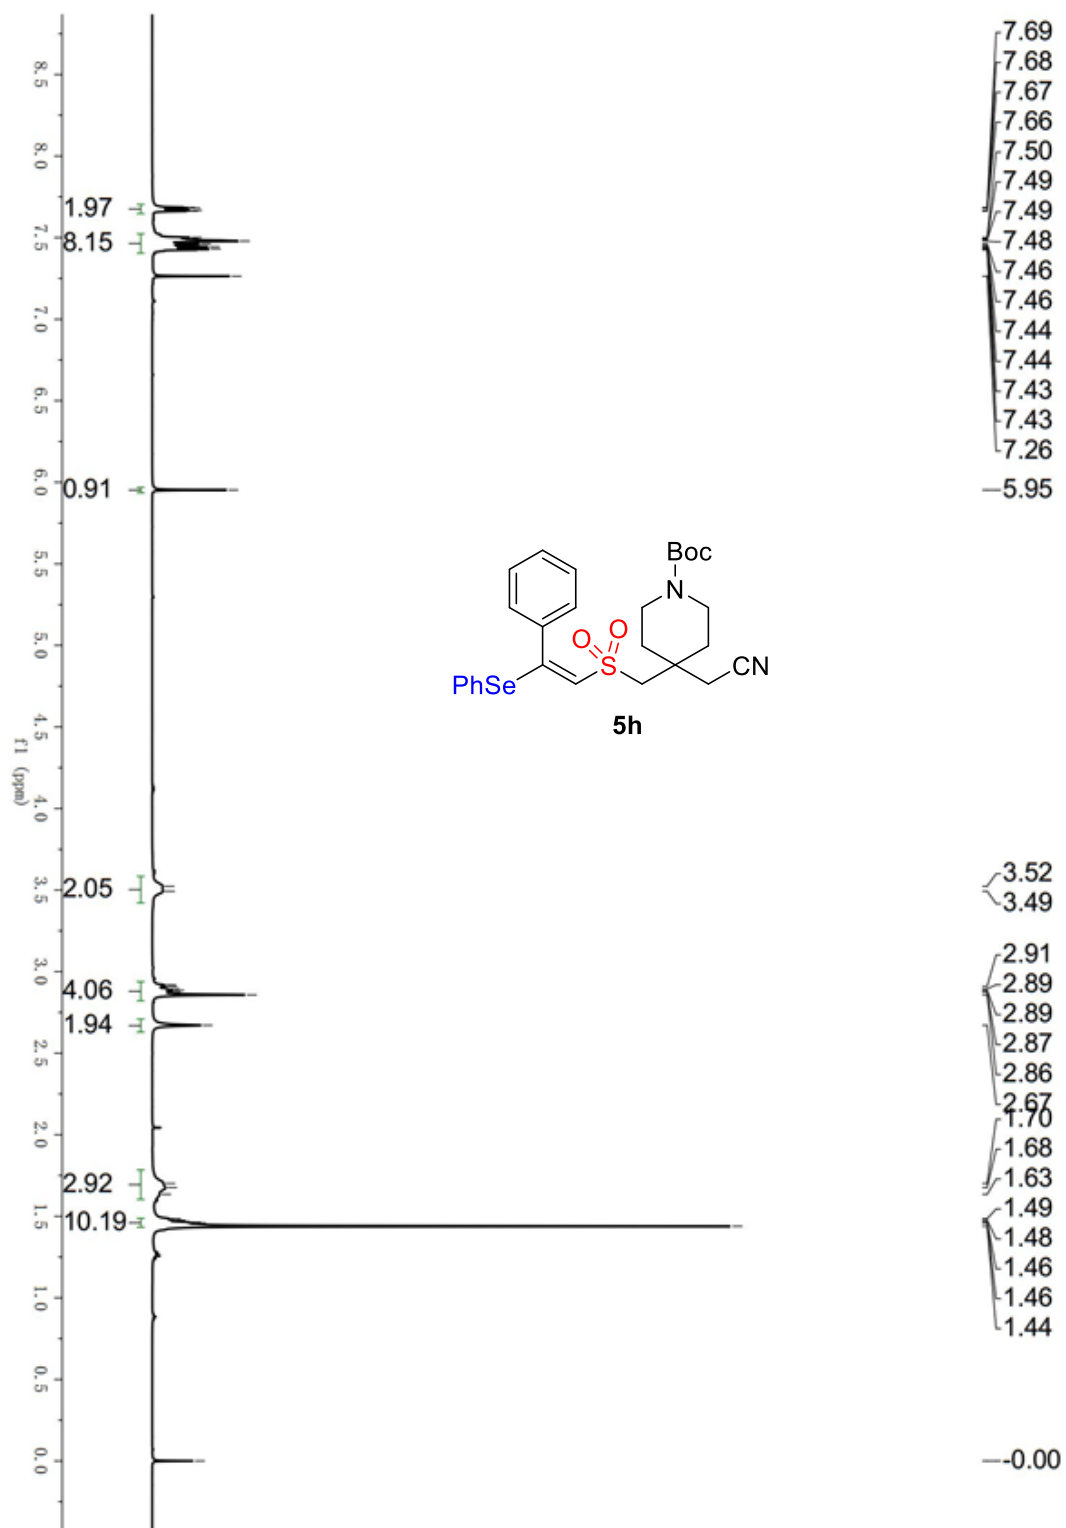

$^{13}\text{C}$  NMR spectrum of compound **5h** (100 MHz,  $\text{CDCl}_3$ )

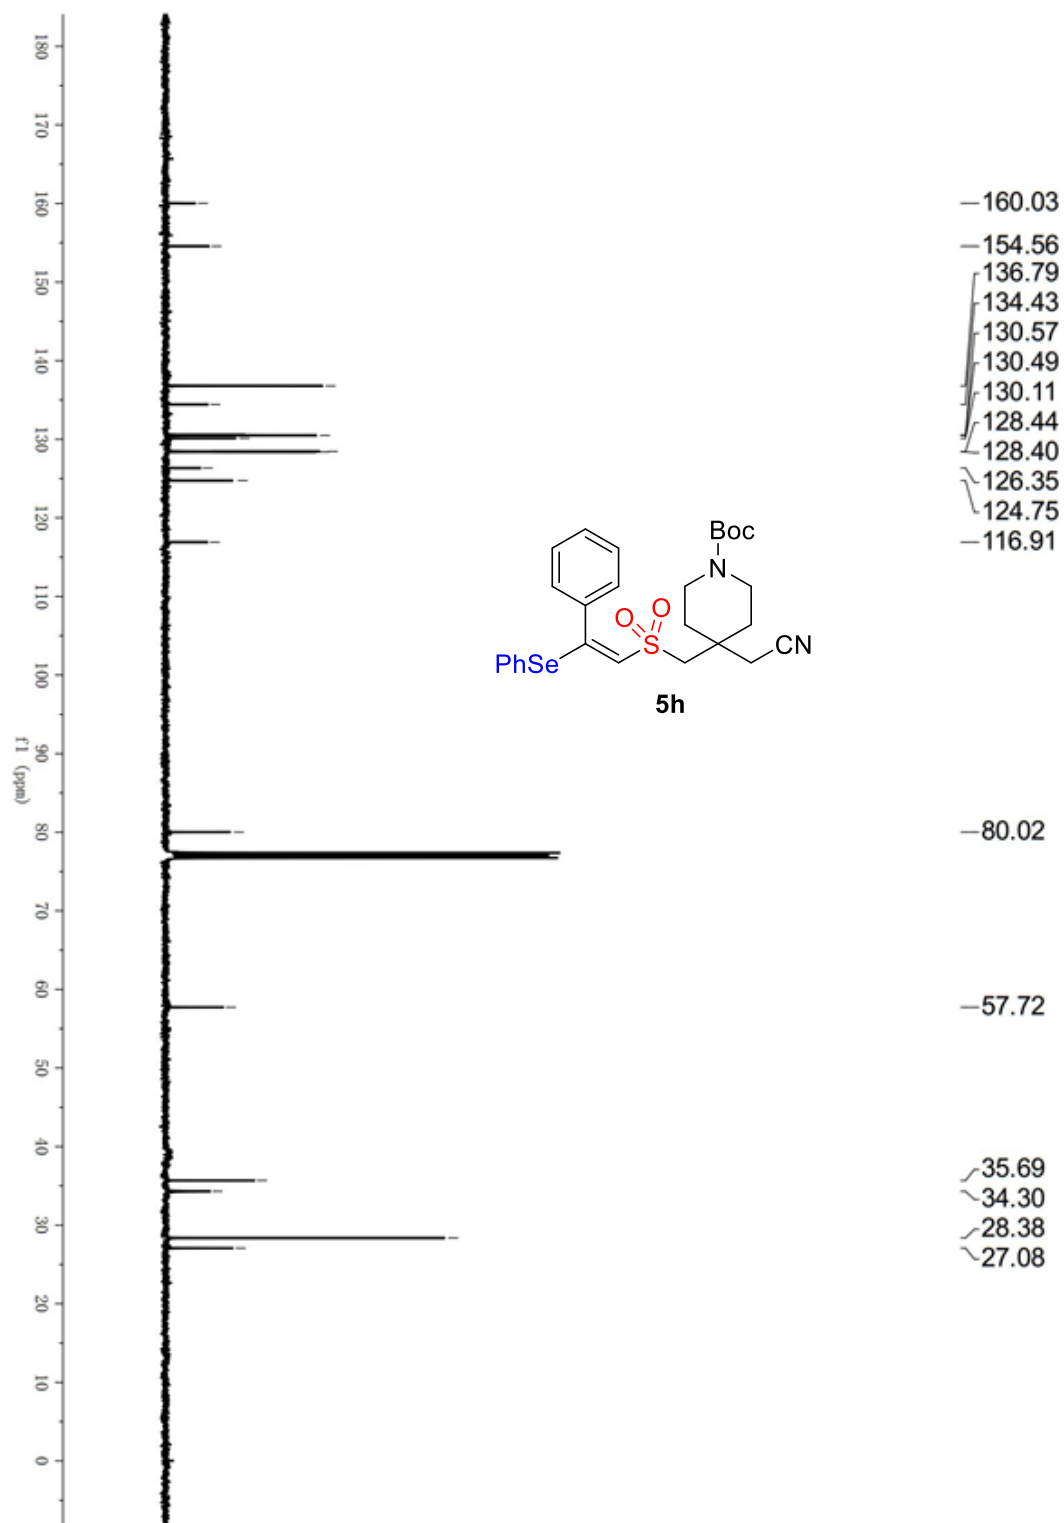

$^1\text{H}$  NMR spectrum of compound **5i** (400 MHz,  $\text{CDCl}_3$ )

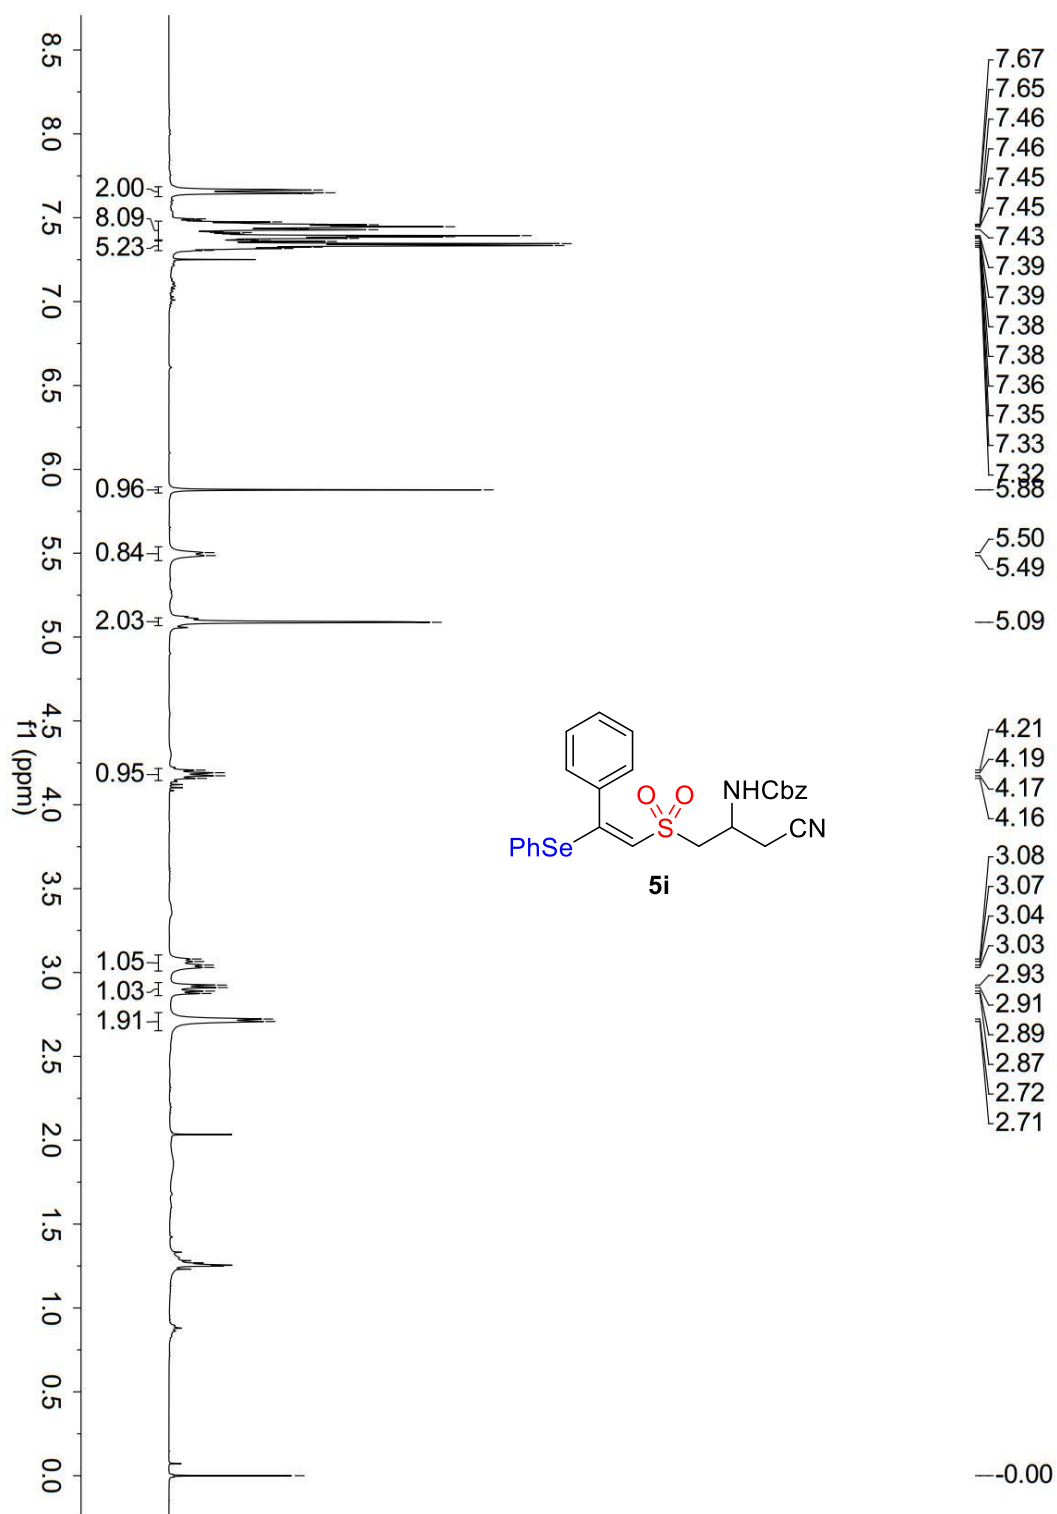

$^{13}\text{C}$  NMR spectrum of compound **5i** (100 MHz,  $\text{CDCl}_3$ )

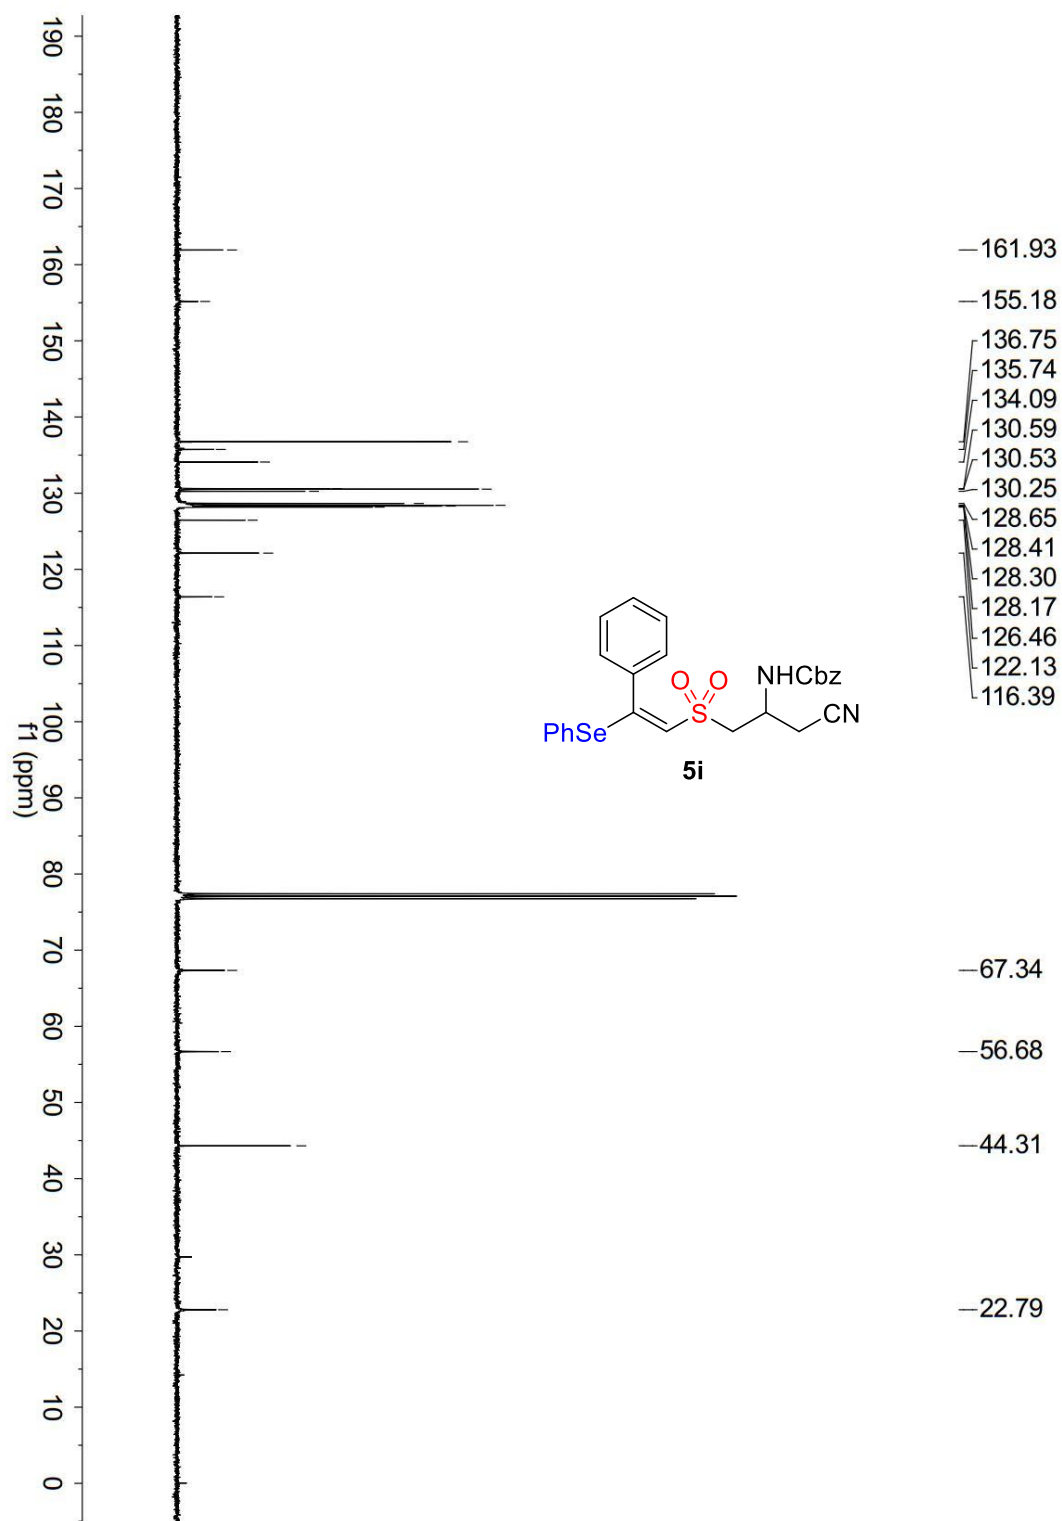



$^1\text{H}$  NMR spectrum of compound **5j** (400 MHz,  $\text{CDCl}_3$ )

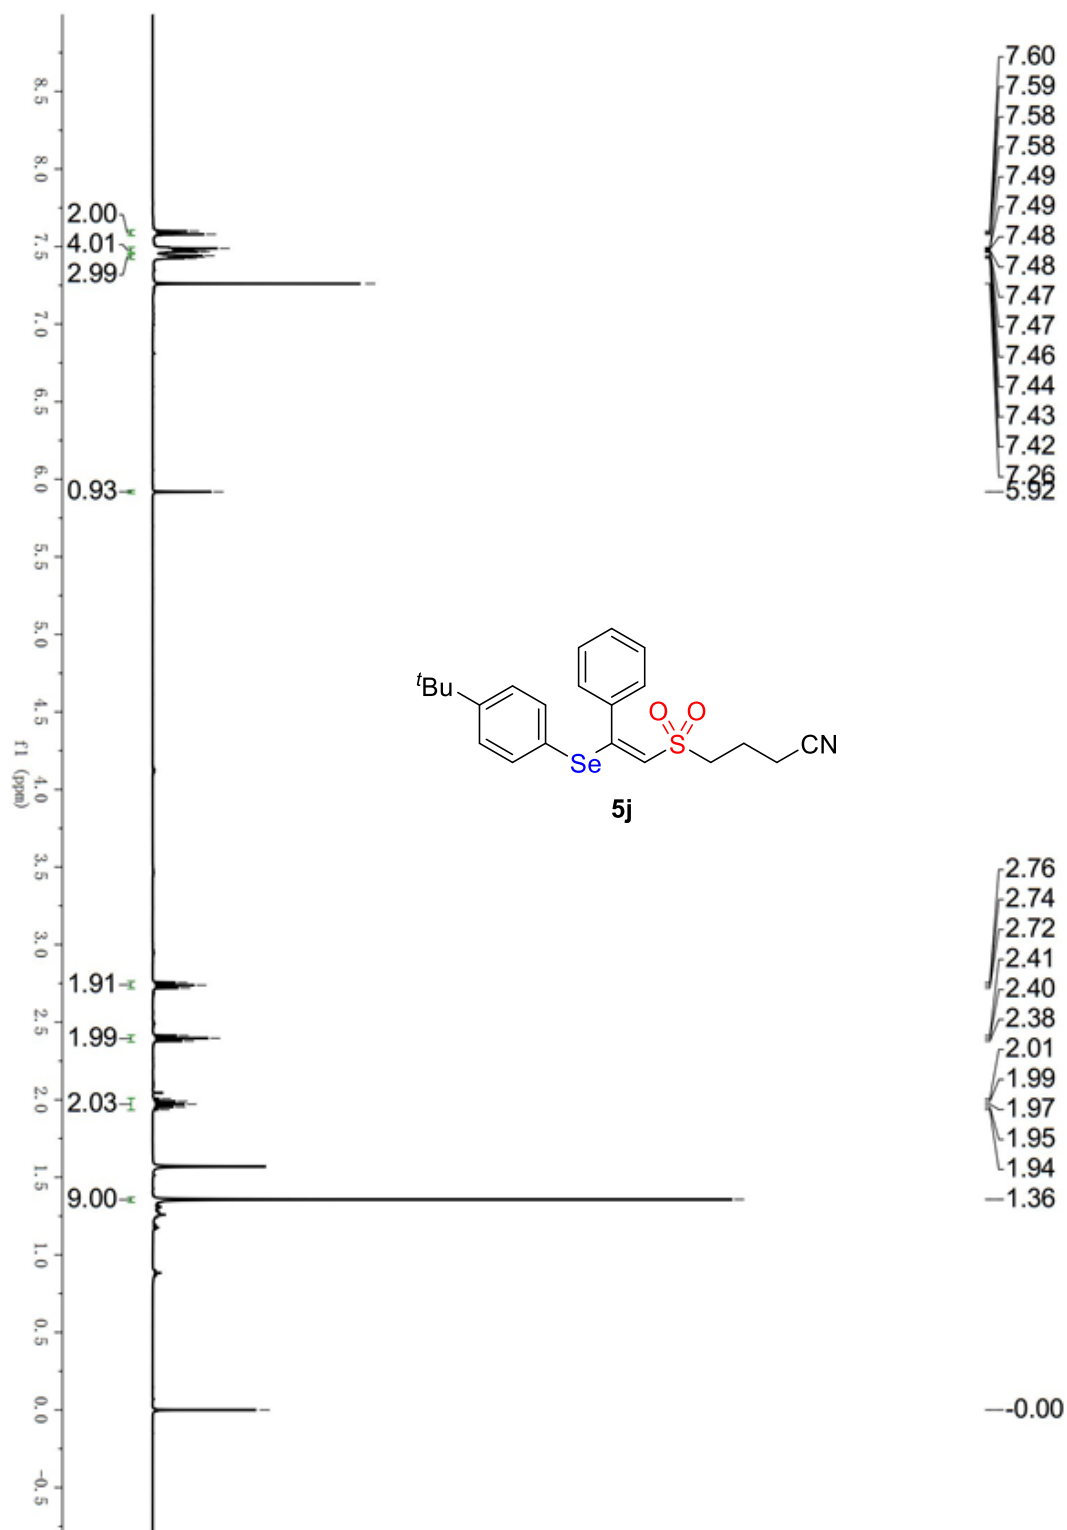

$^{13}\text{C}$  NMR spectrum of compound **5j** (100 MHz,  $\text{CDCl}_3$ )

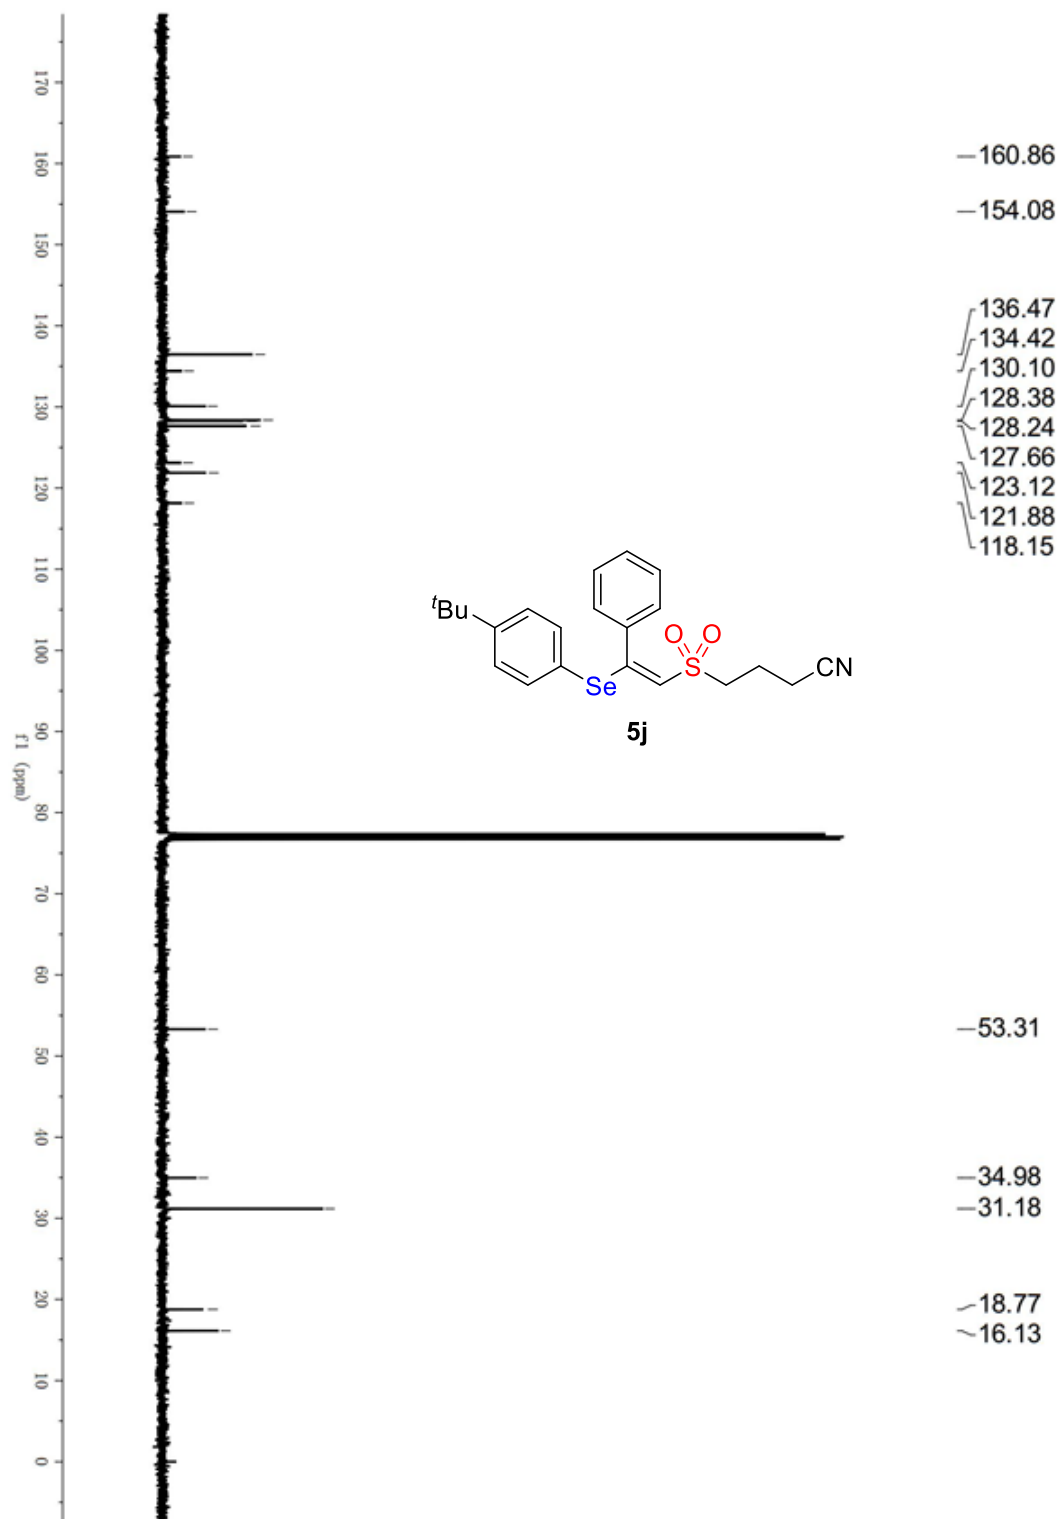

$^1\text{H}$  NMR spectrum of compound **5k** (400 MHz,  $\text{CDCl}_3$ )

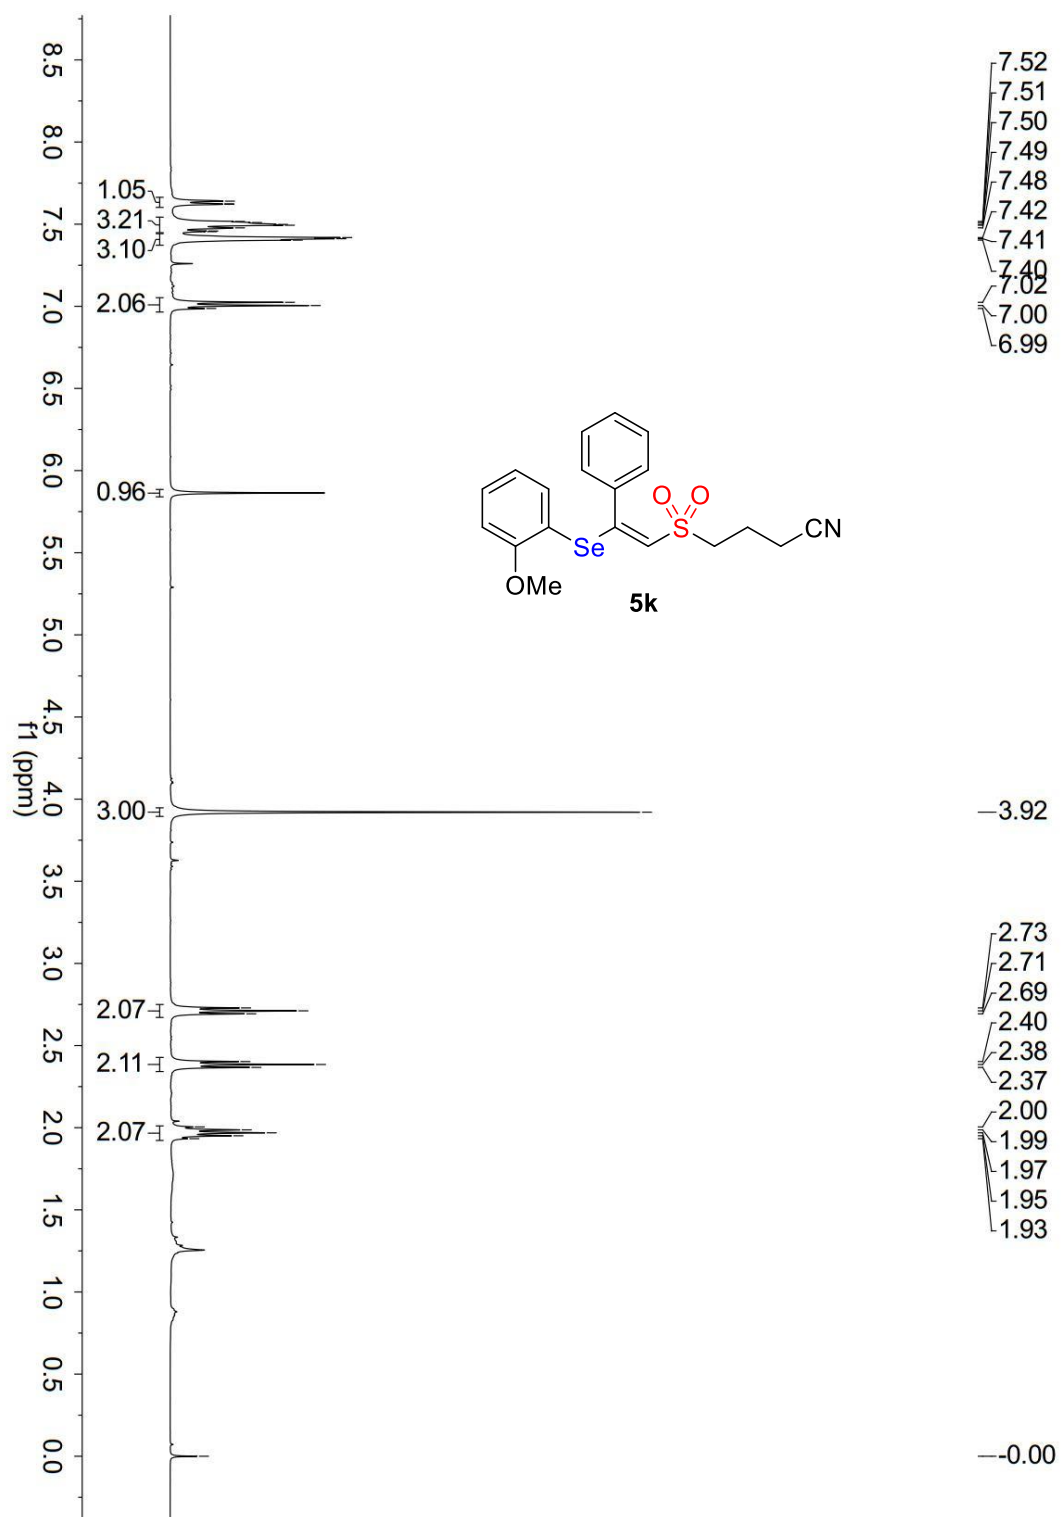

$^{13}\text{C}$  NMR spectrum of compound **5k** (100 MHz,  $\text{CDCl}_3$ )

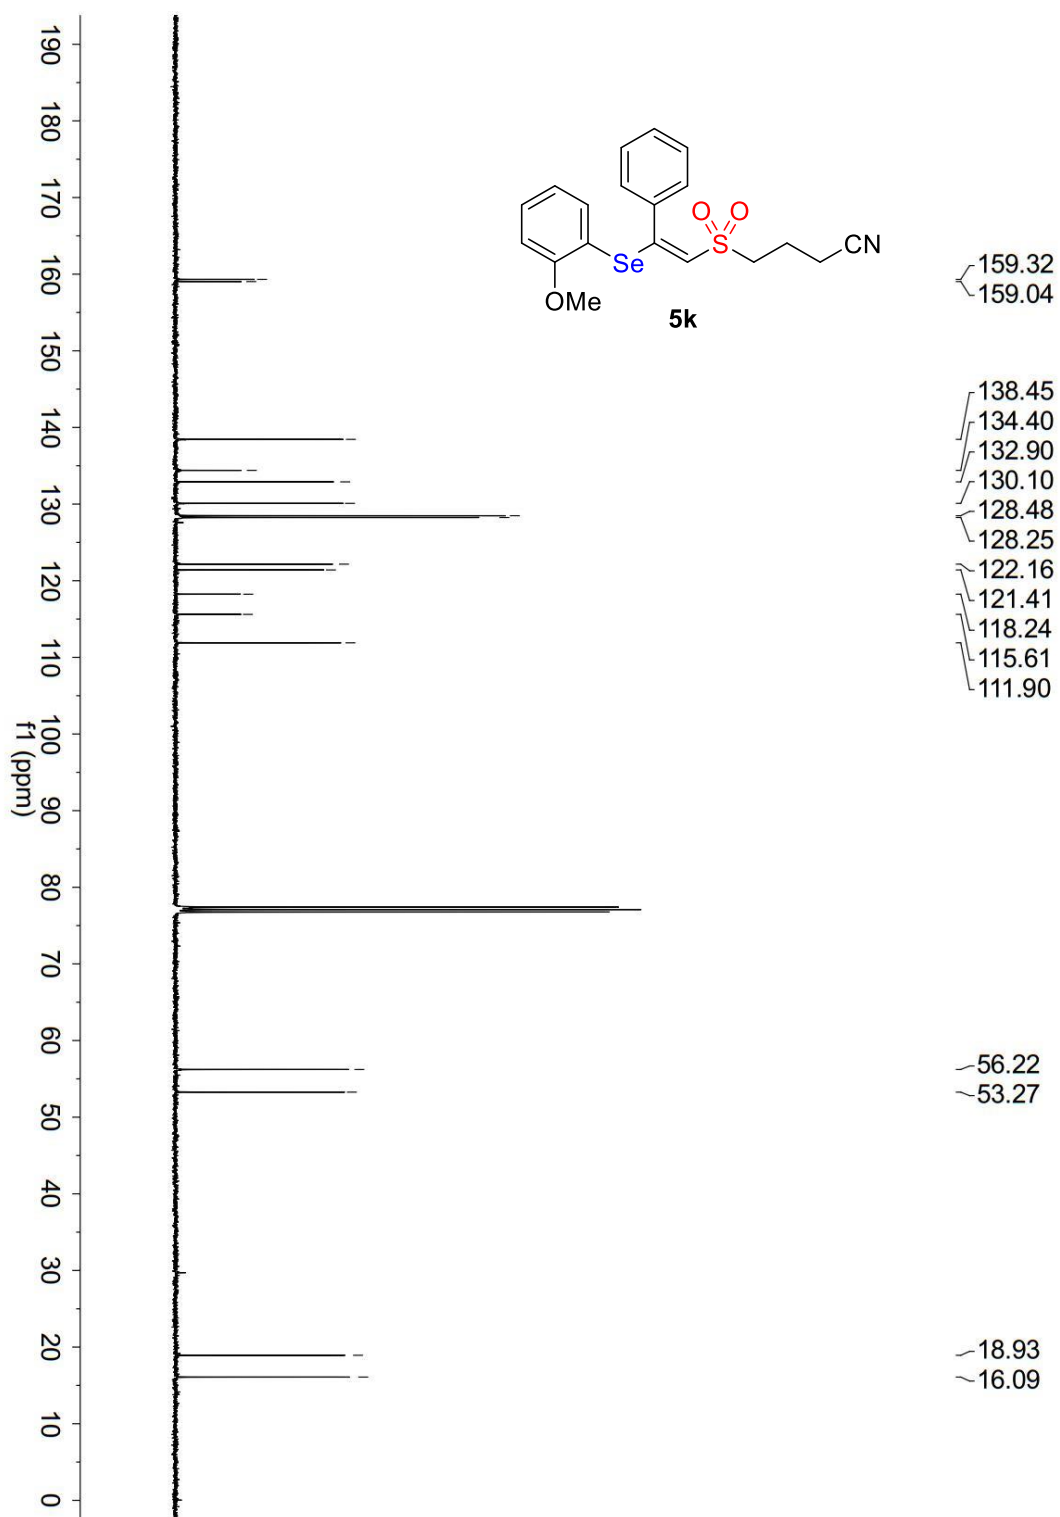

$^1\text{H}$  NMR spectrum of compound **51** (400 MHz,  $\text{CDCl}_3$ )

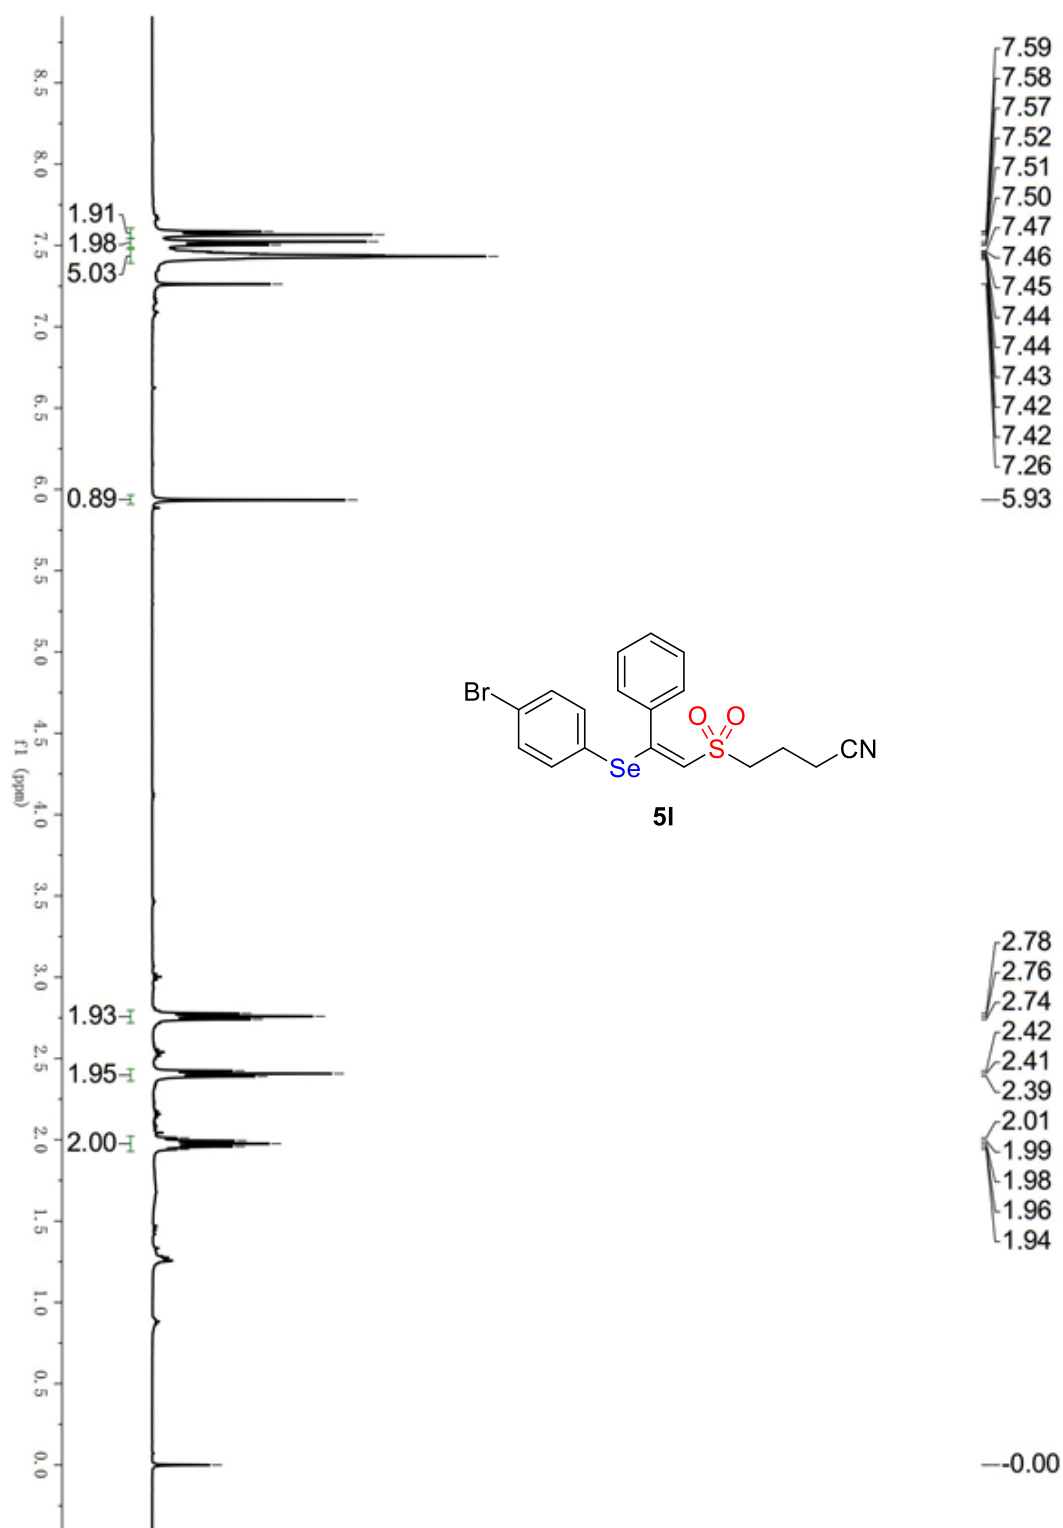

$^{13}\text{C}$  NMR spectrum of compound **5I** (100 MHz,  $\text{CDCl}_3$ )

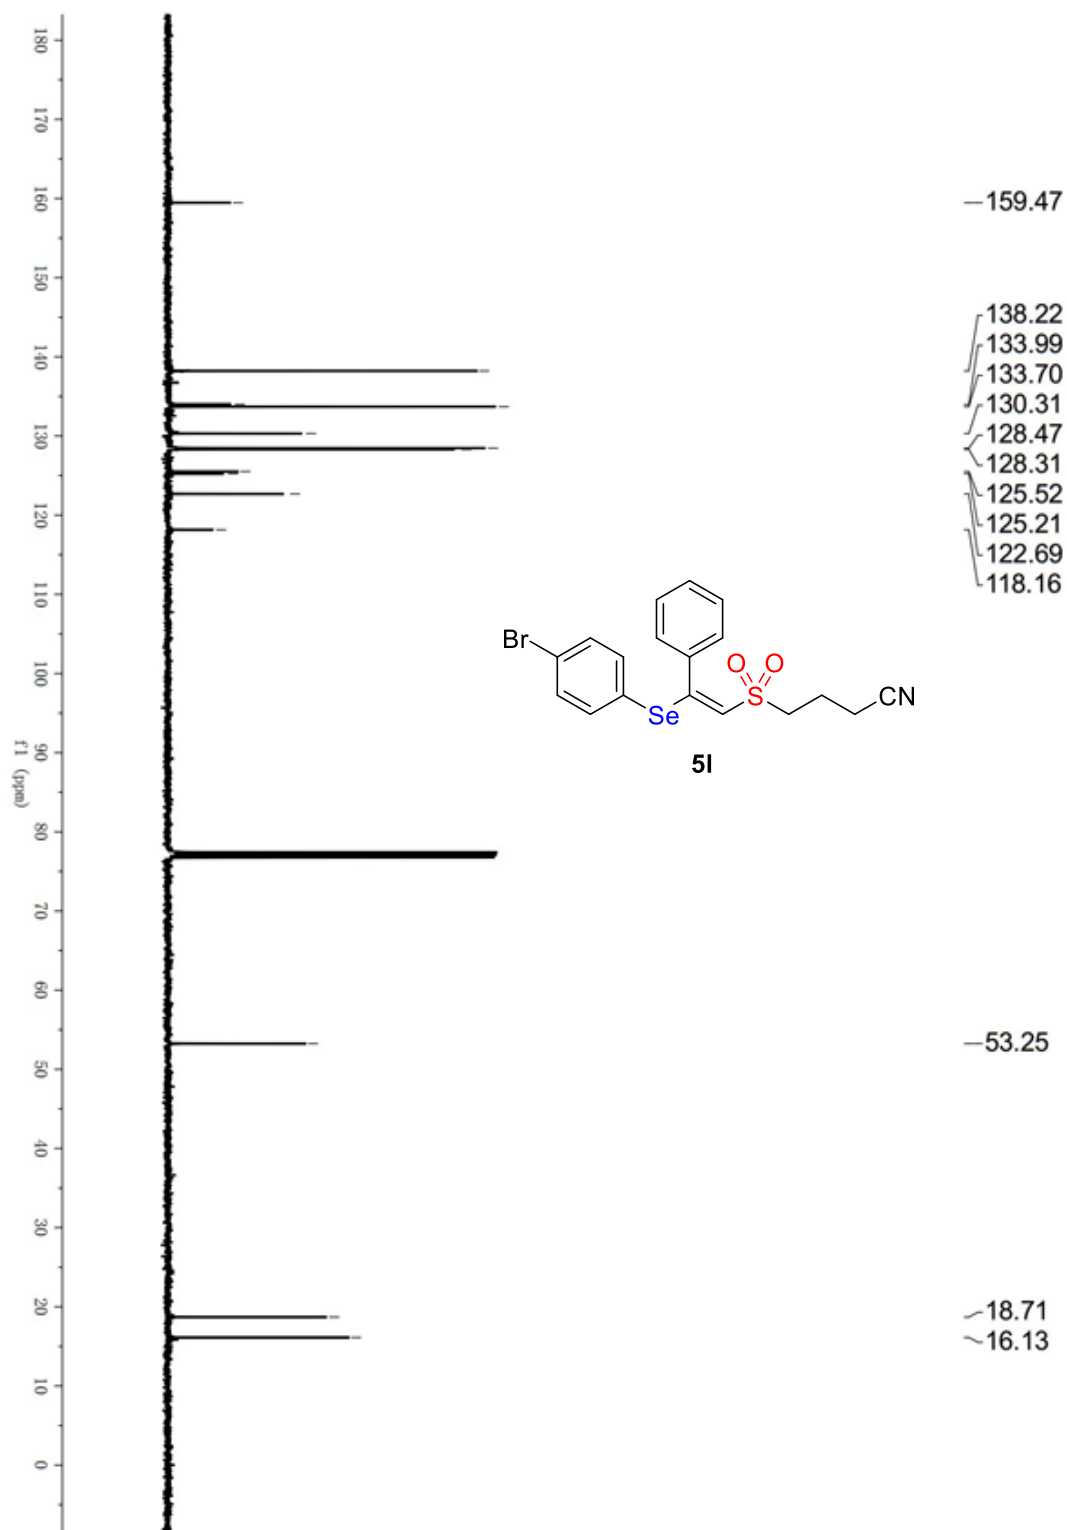

$^1\text{H}$  NMR spectrum of compound **5m** (400 MHz,  $\text{CDCl}_3$ )

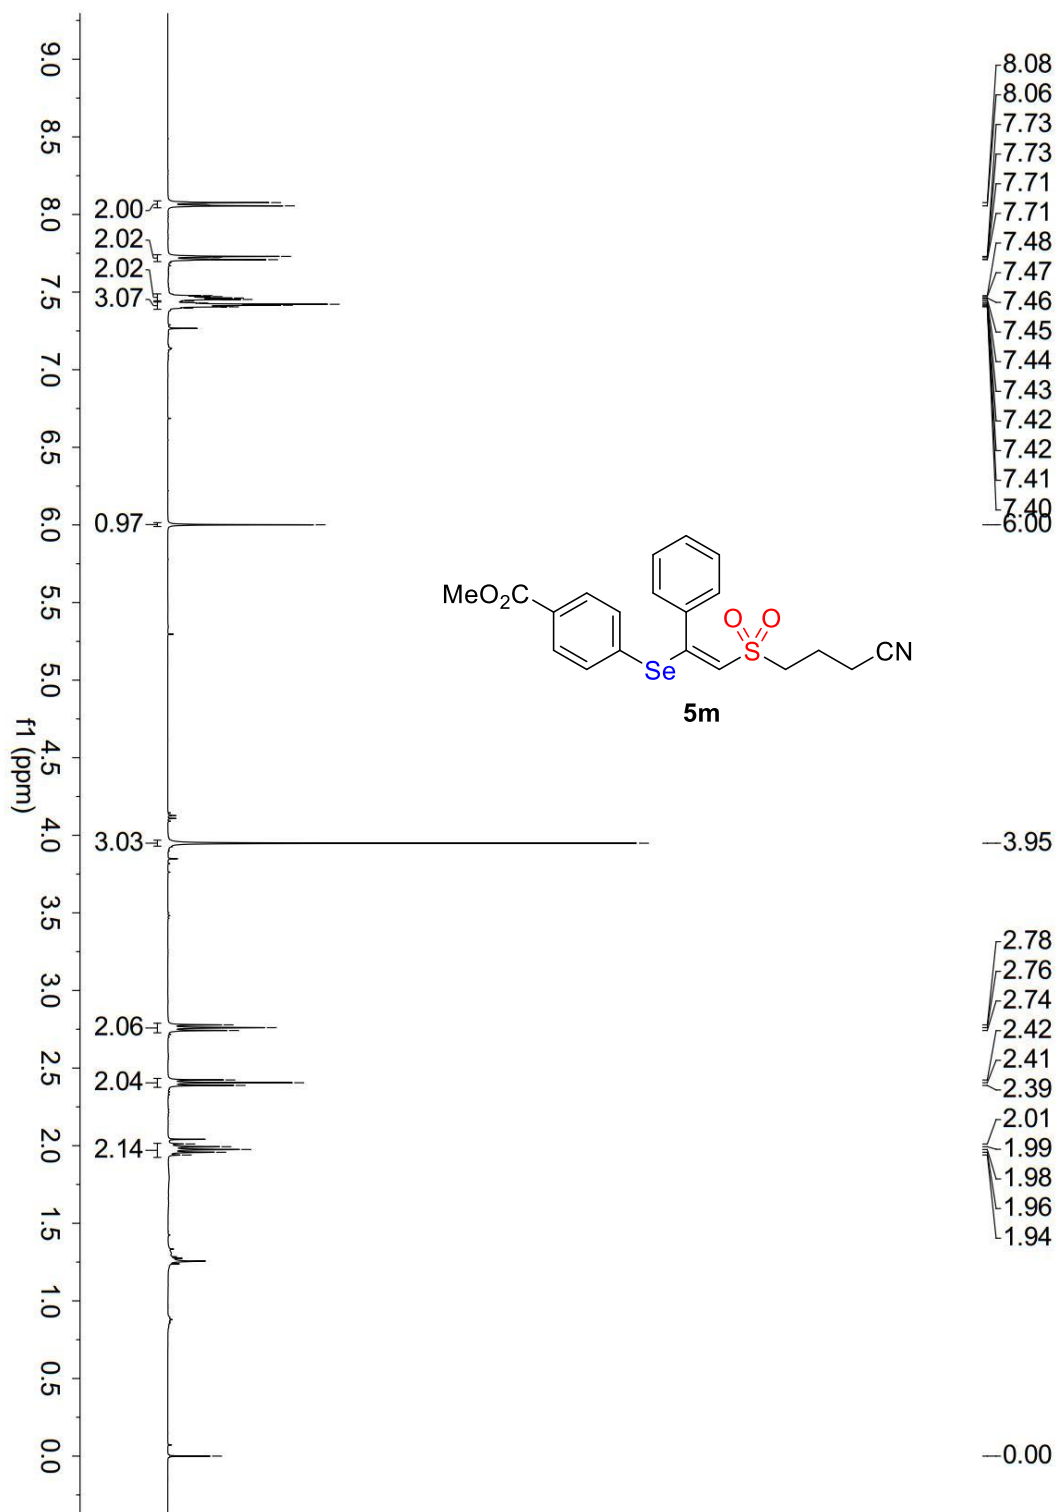

$^{13}\text{C}$  NMR spectrum of compound **5m** (100 MHz,  $\text{CDCl}_3$ )

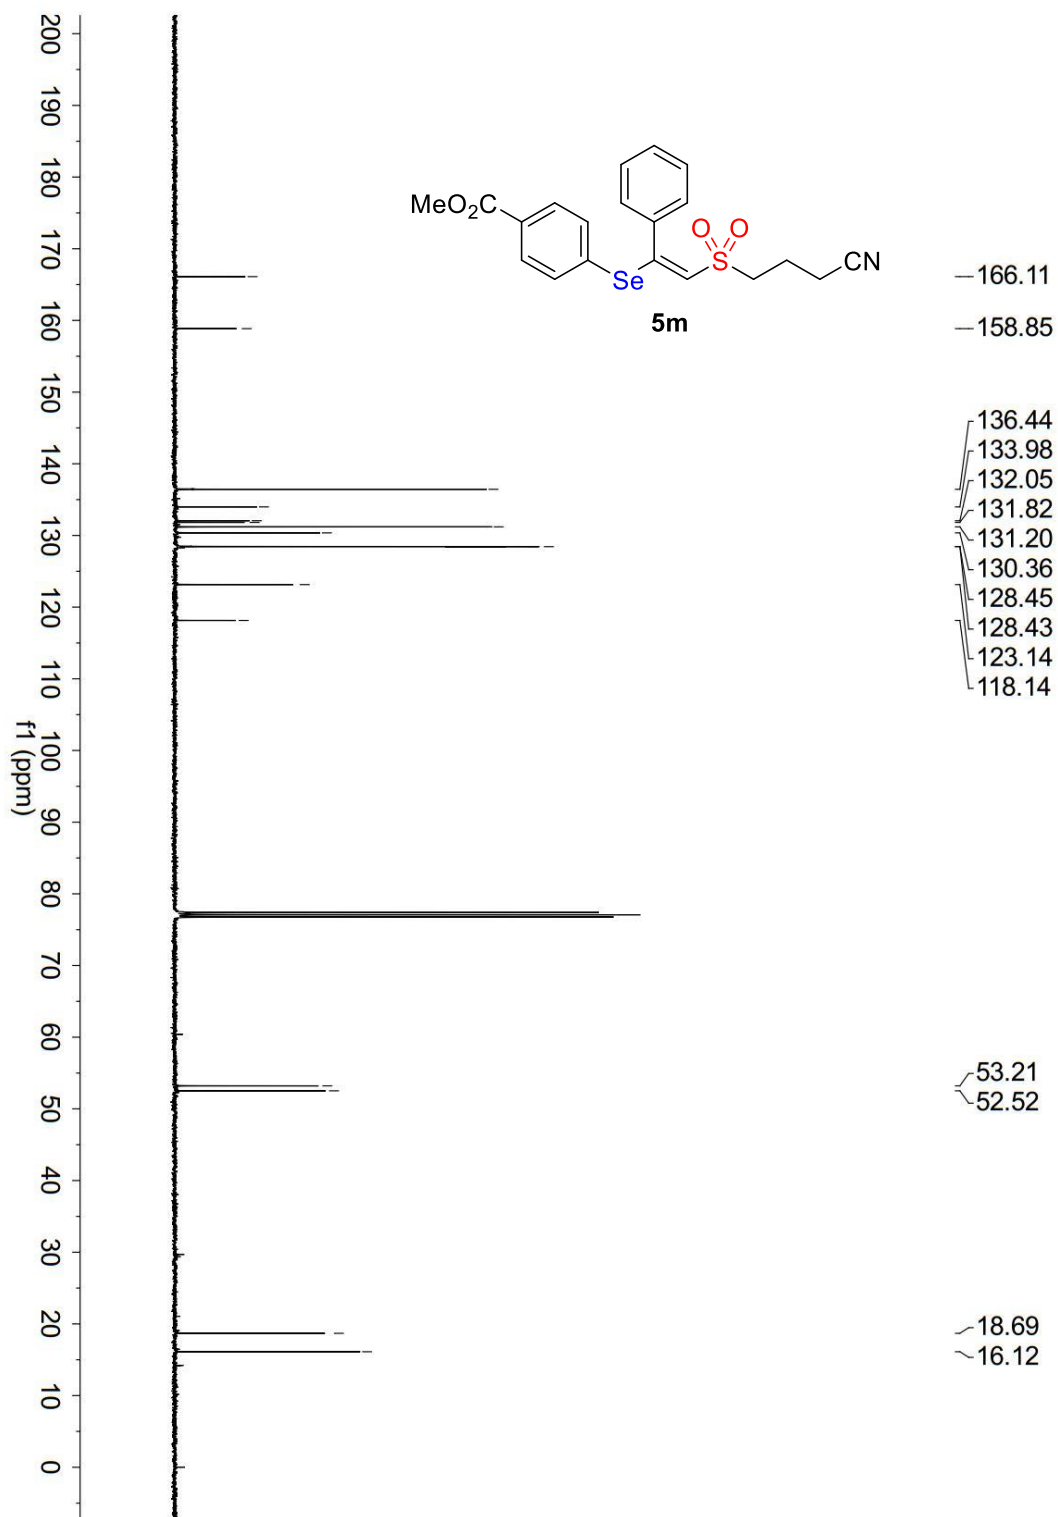



$^1\text{H}$  NMR spectrum of compound **6** (400 MHz,  $\text{CDCl}_3$ )

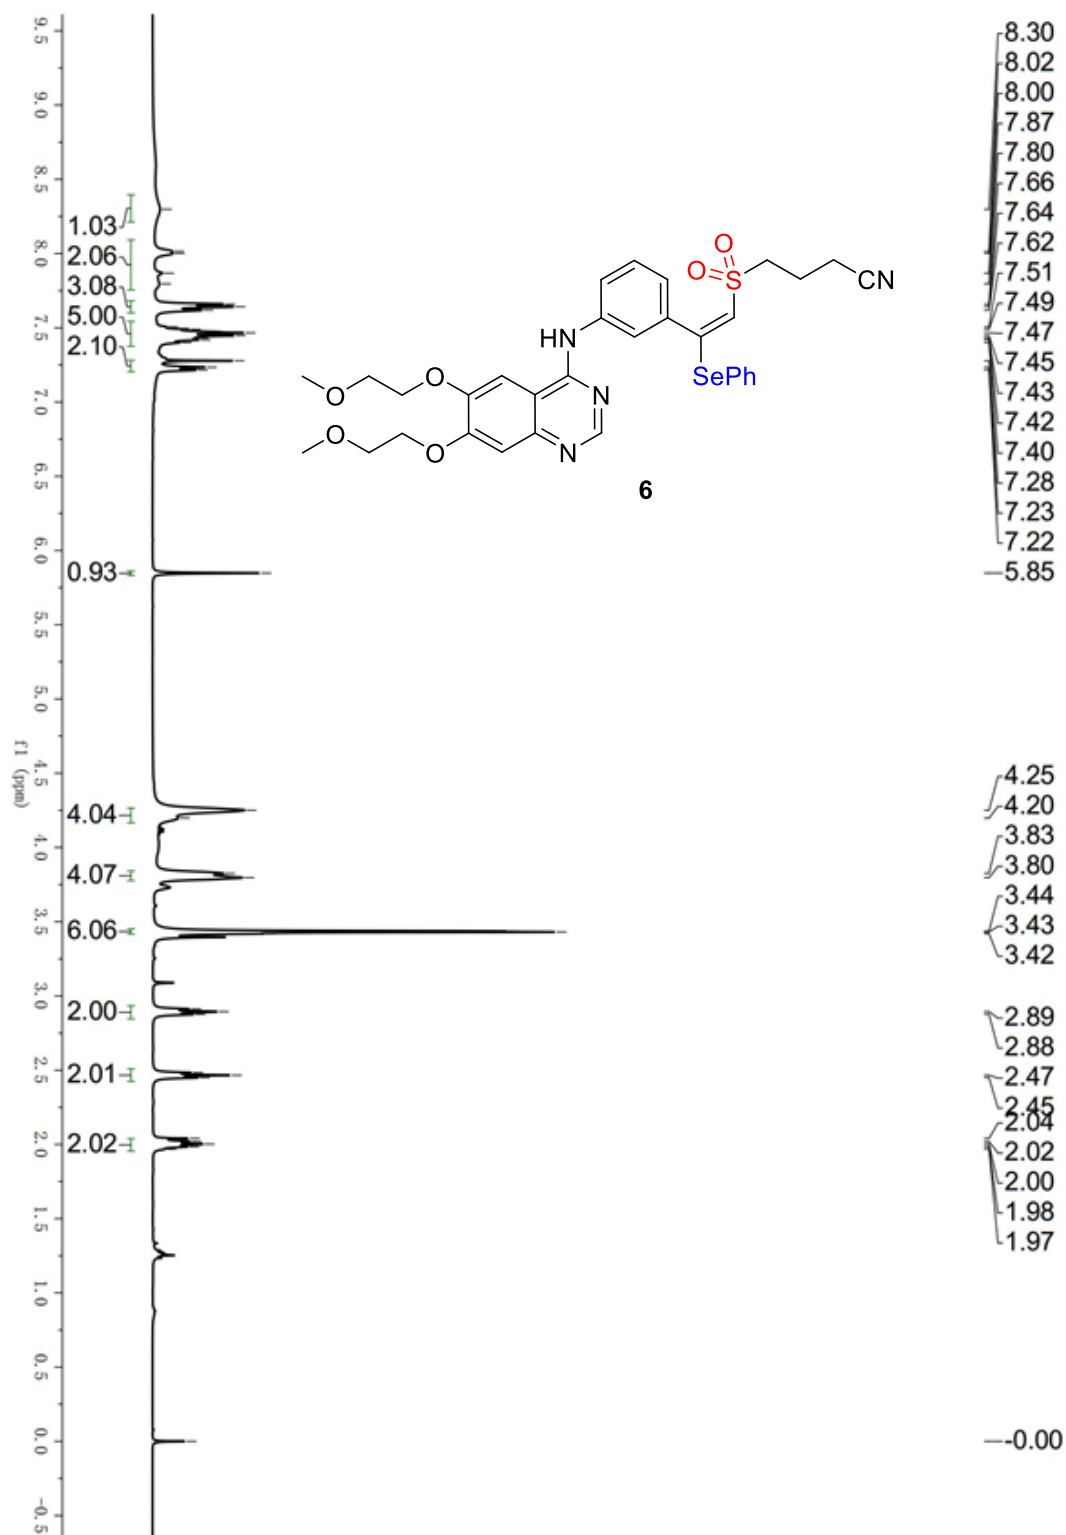

$^{13}\text{C}$  NMR spectrum of compound **6** (100 MHz,  $\text{CDCl}_3$ )

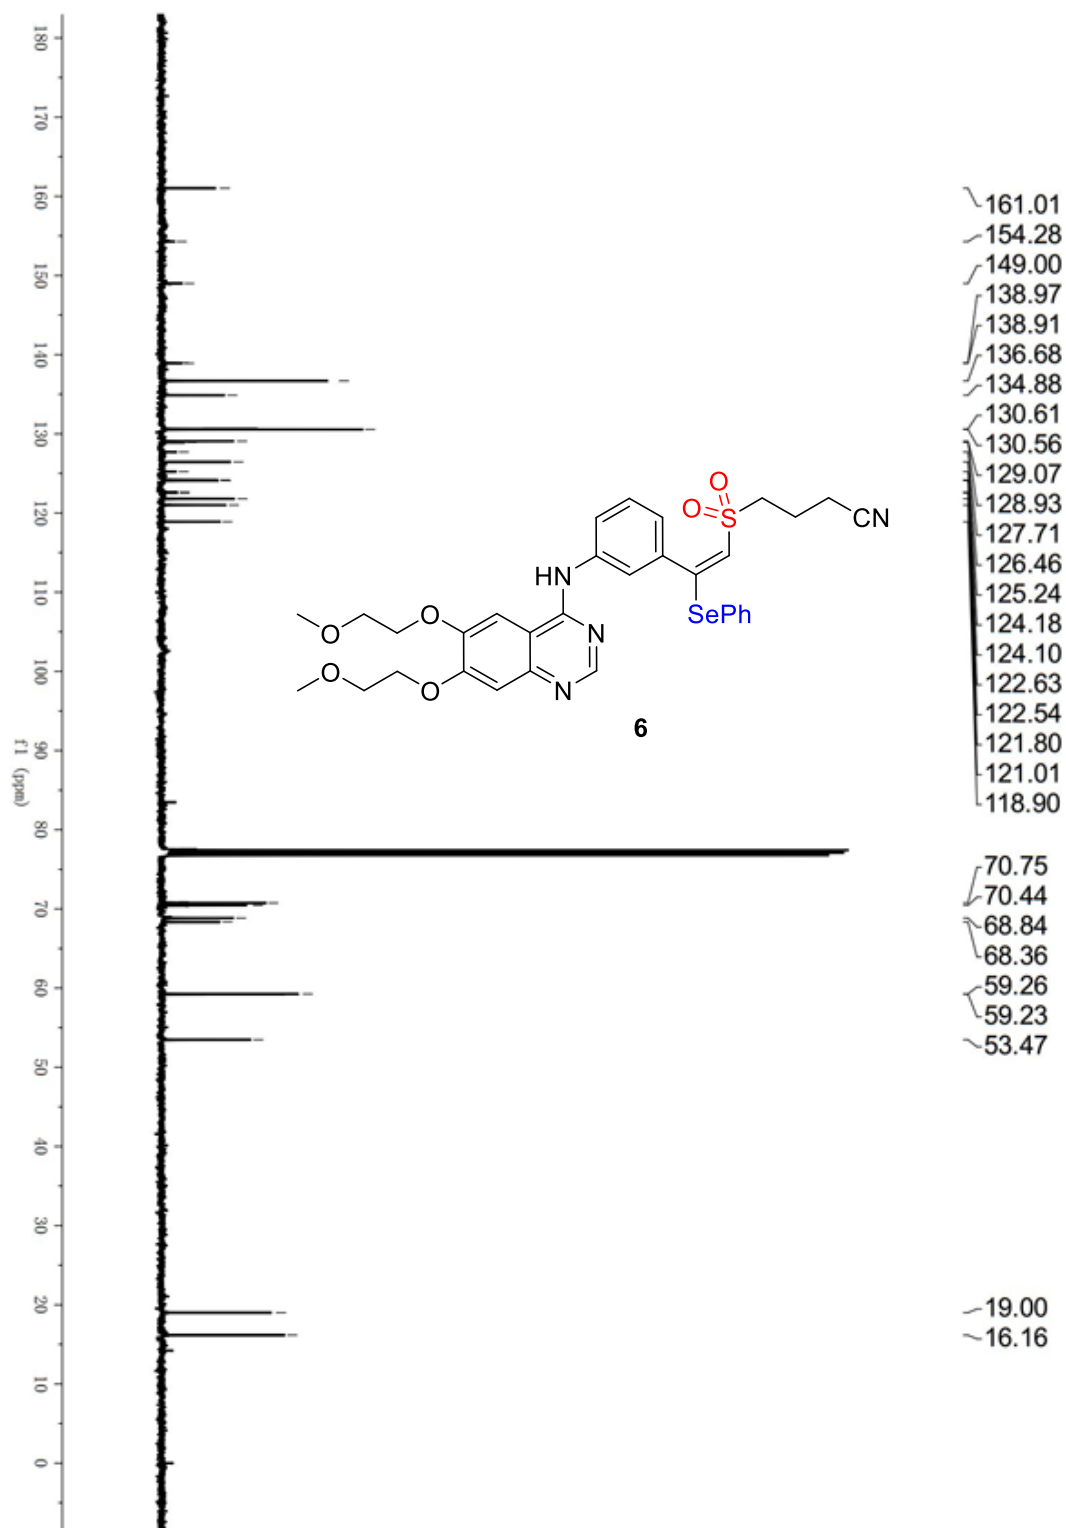

$^1\text{H}$  NMR spectrum of compound **7** (400 MHz,  $\text{CDCl}_3$ )

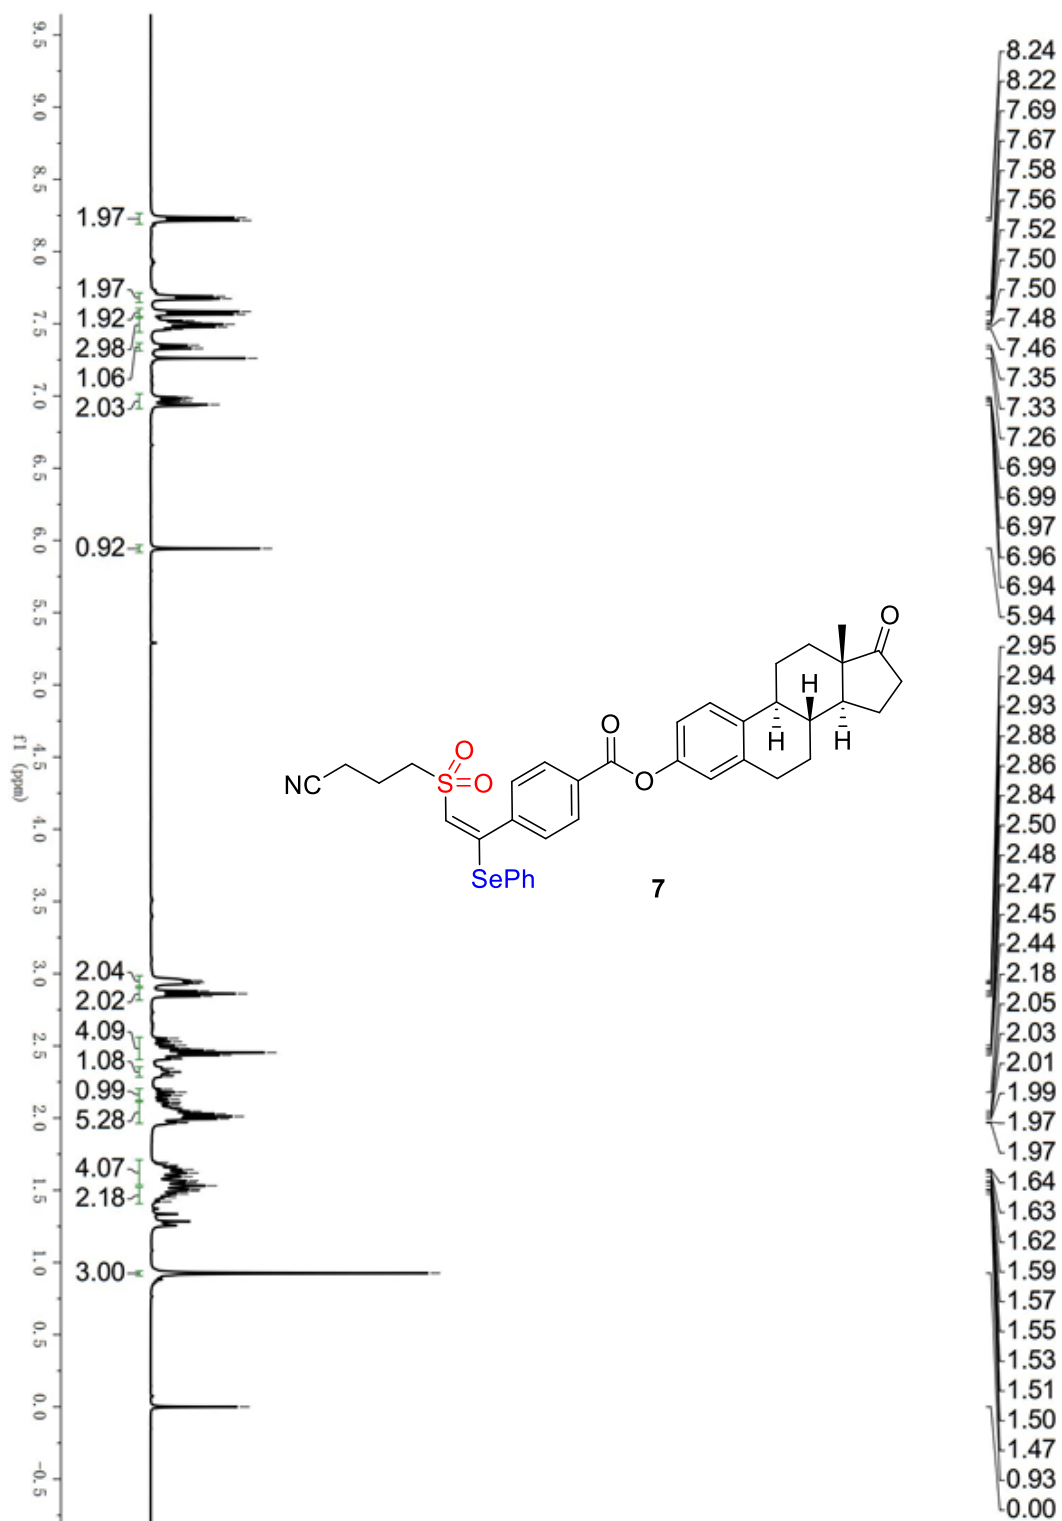

$^{13}\text{C}$  NMR spectrum of compound **7** (100 MHz,  $\text{CDCl}_3$ )

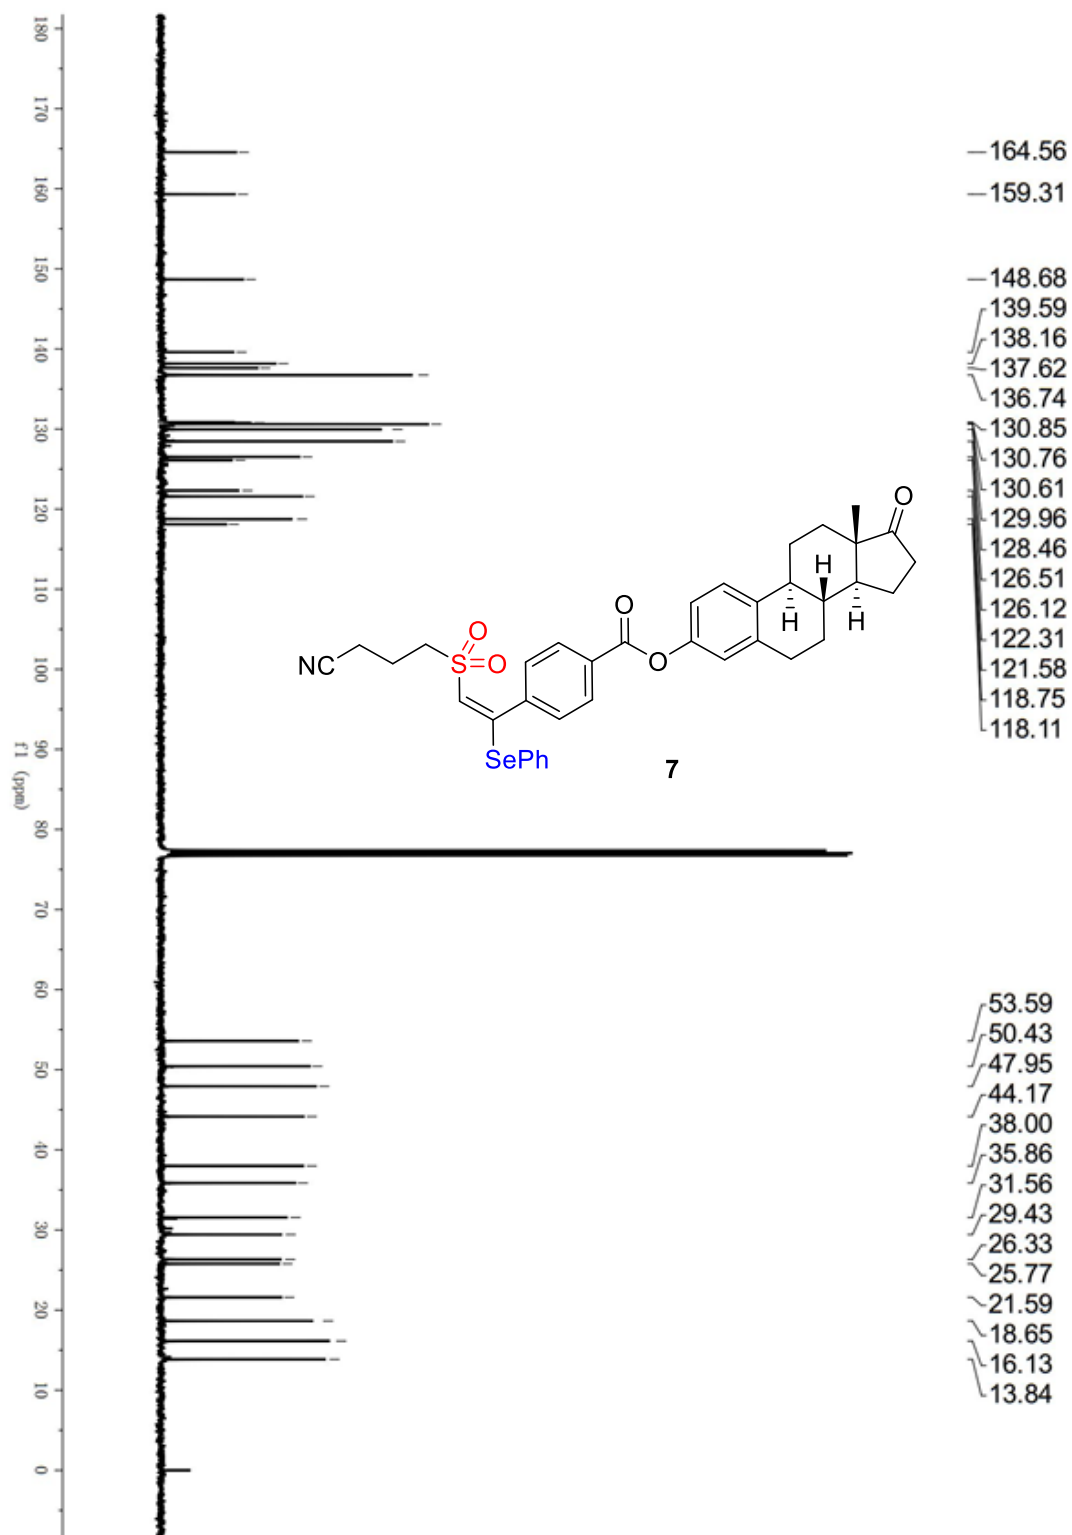

$^1\text{H}$  NMR spectrum of compound **8a** (400 MHz,  $\text{CDCl}_3$ )

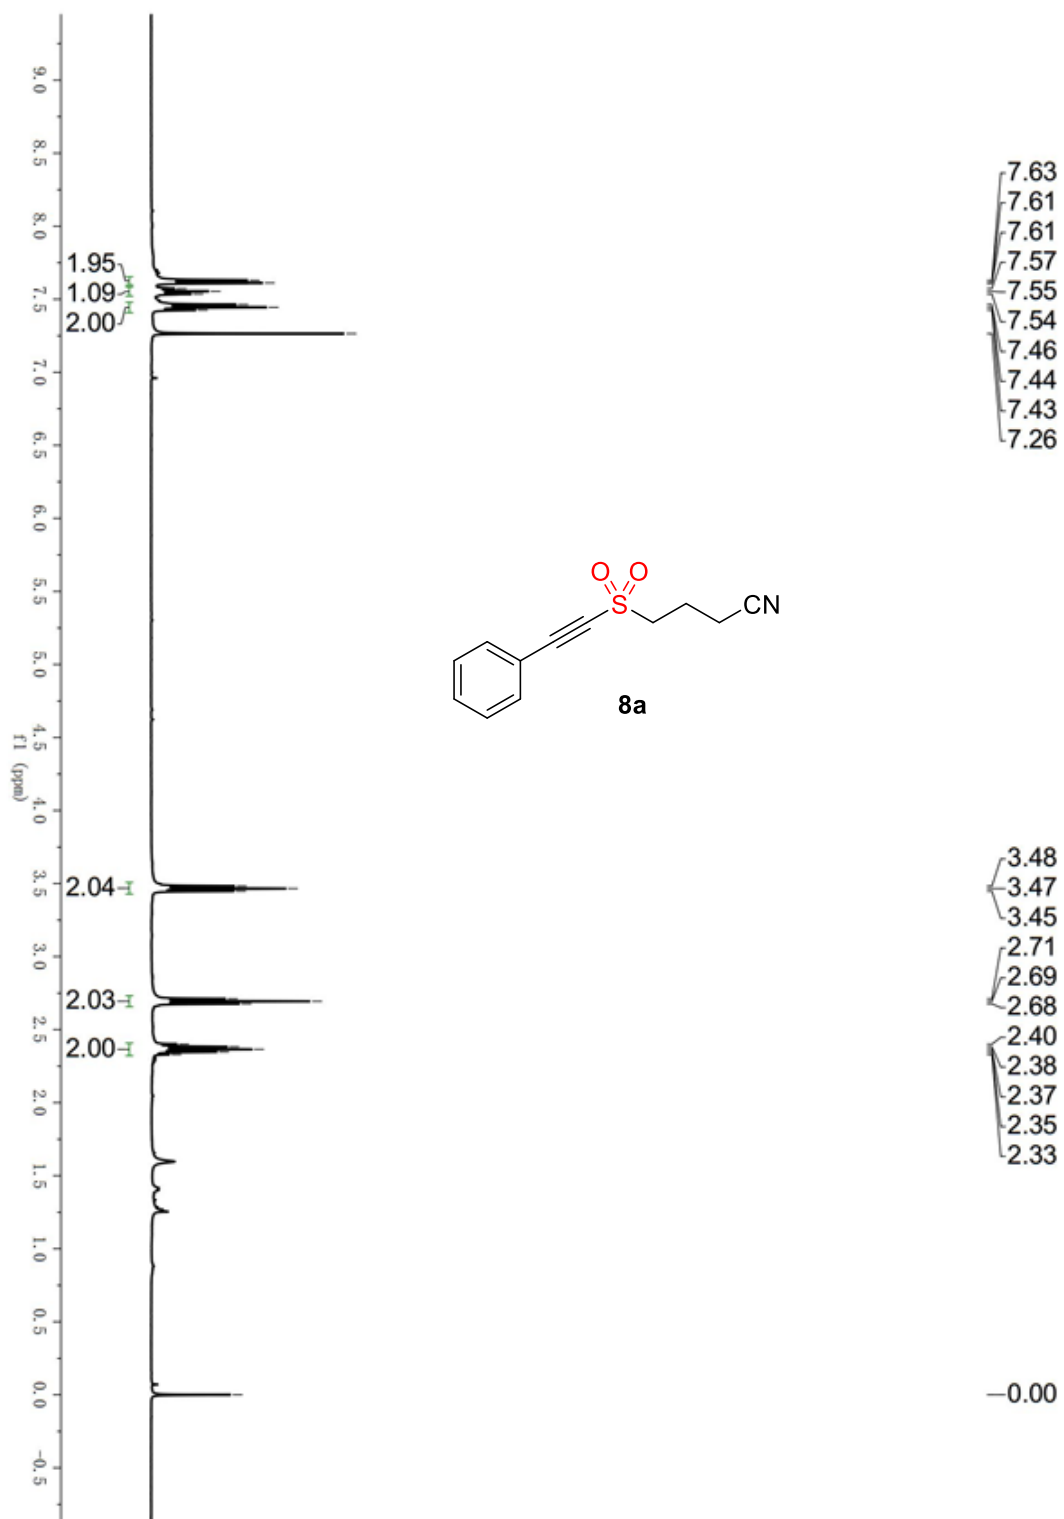

$^{13}\text{C}$  NMR spectrum of compound **8a** (100 MHz,  $\text{CDCl}_3$ )

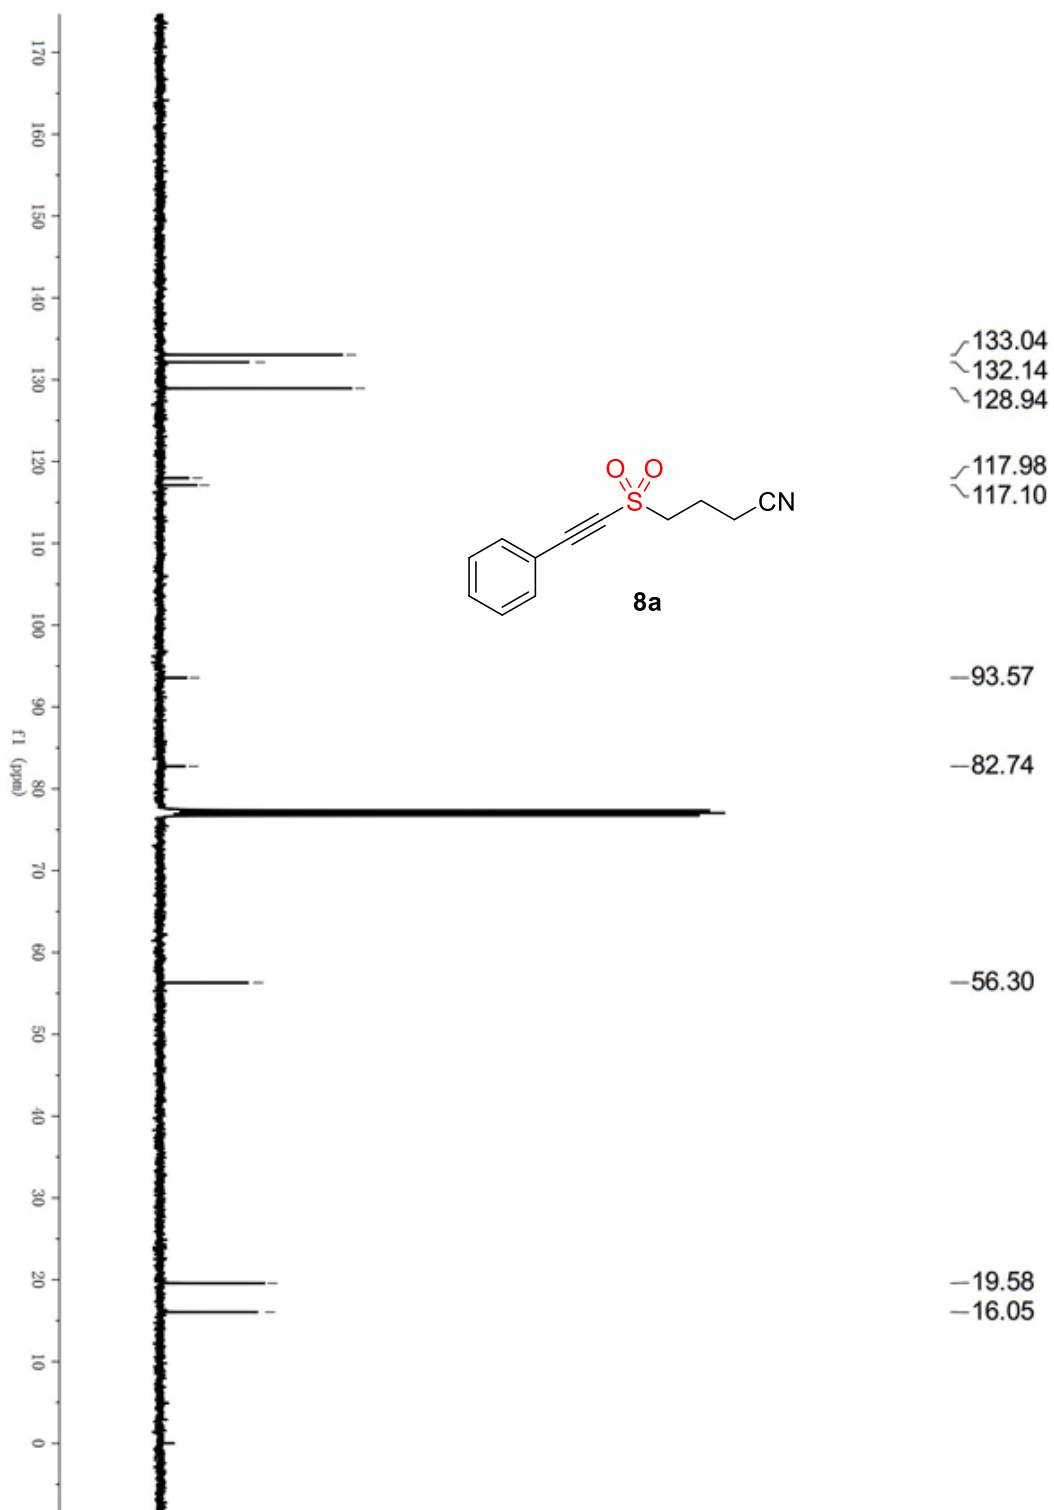

$^1\text{H}$  NMR spectrum of compound **8b** (400 MHz,  $\text{CDCl}_3$ )

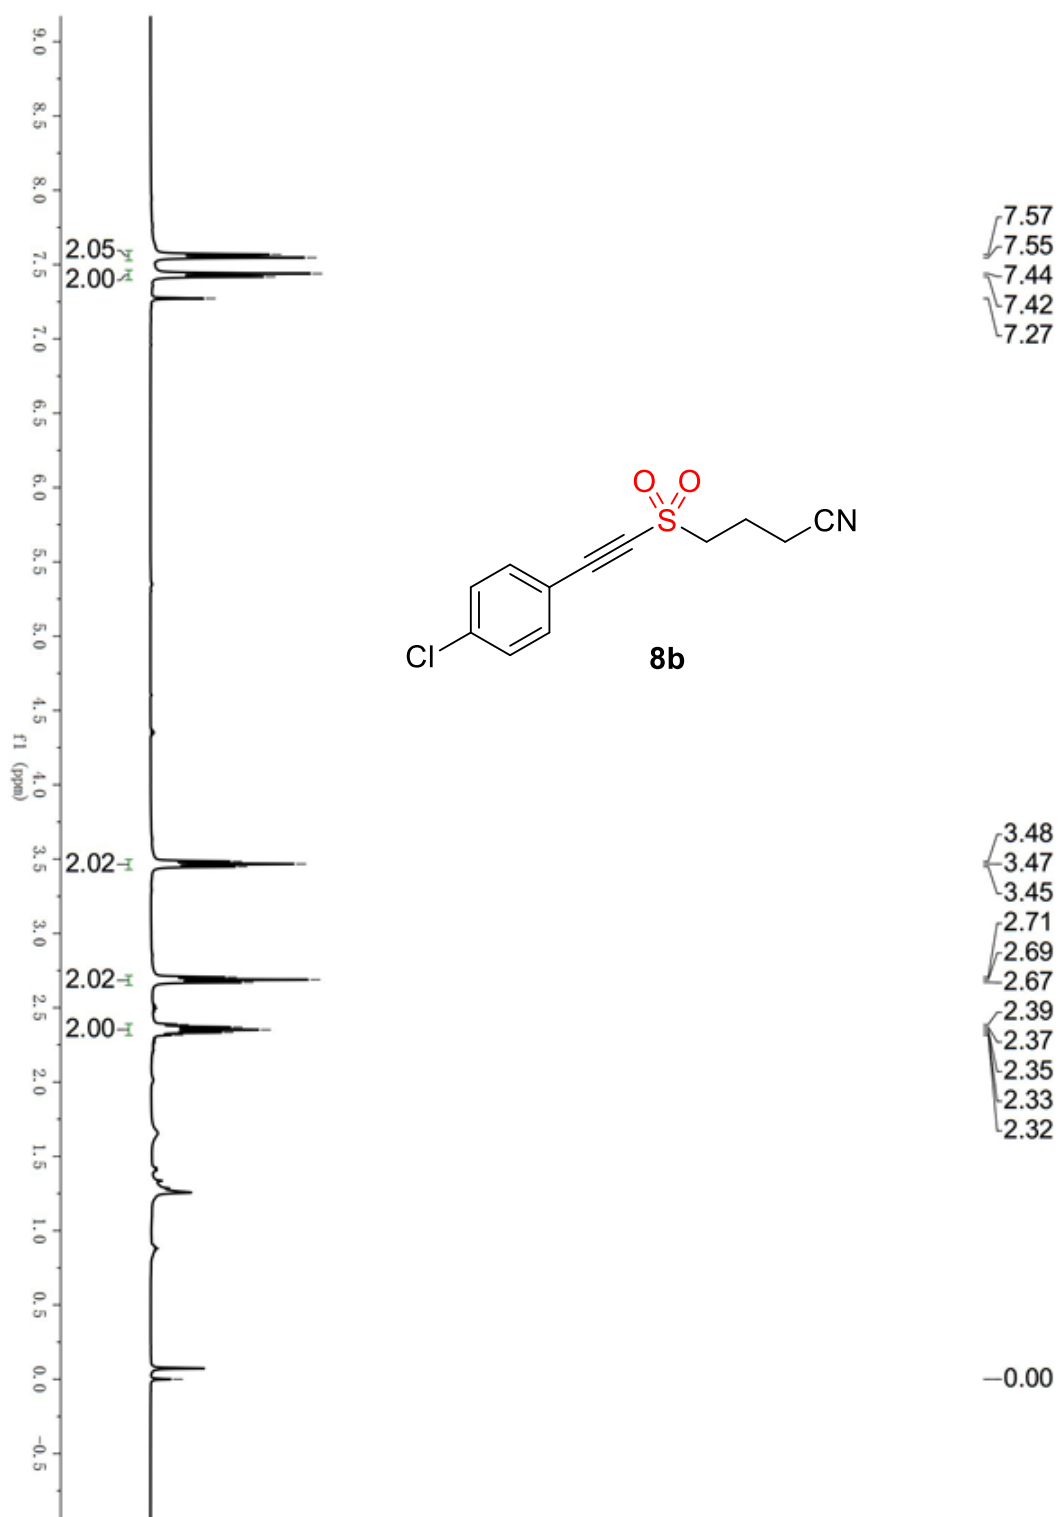

$^{13}\text{C}$  NMR spectrum of compound **8b** (100 MHz,  $\text{CDCl}_3$ )

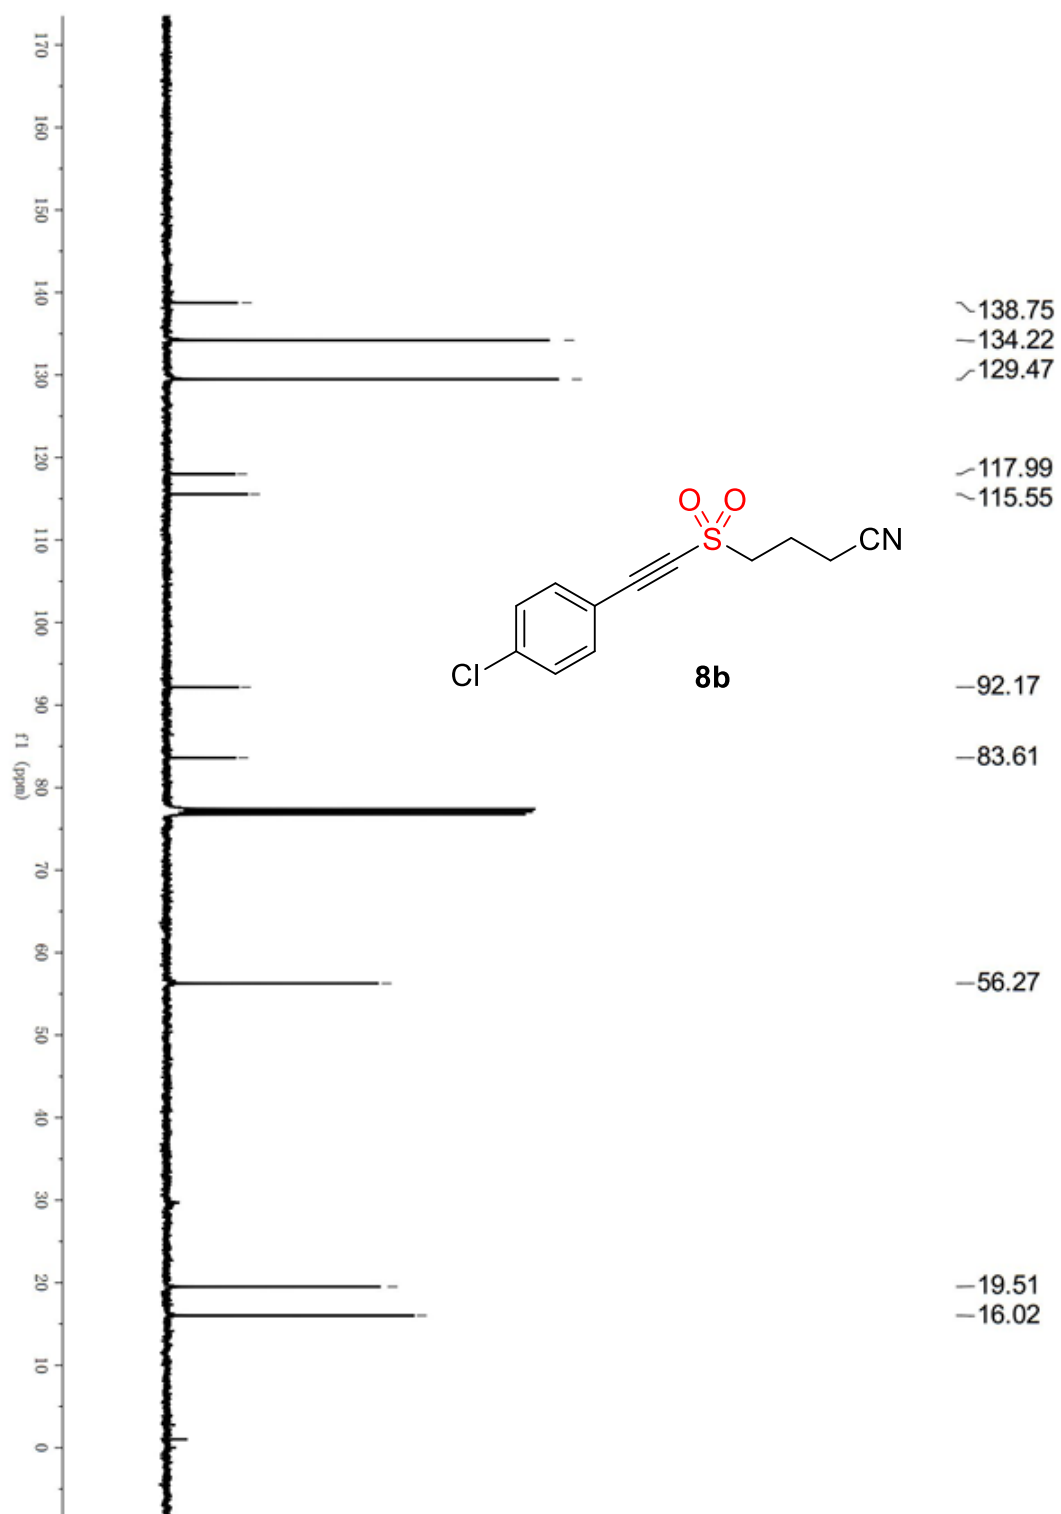



$^1\text{H}$  NMR spectrum of compound **9** (400 MHz,  $\text{CDCl}_3$ )

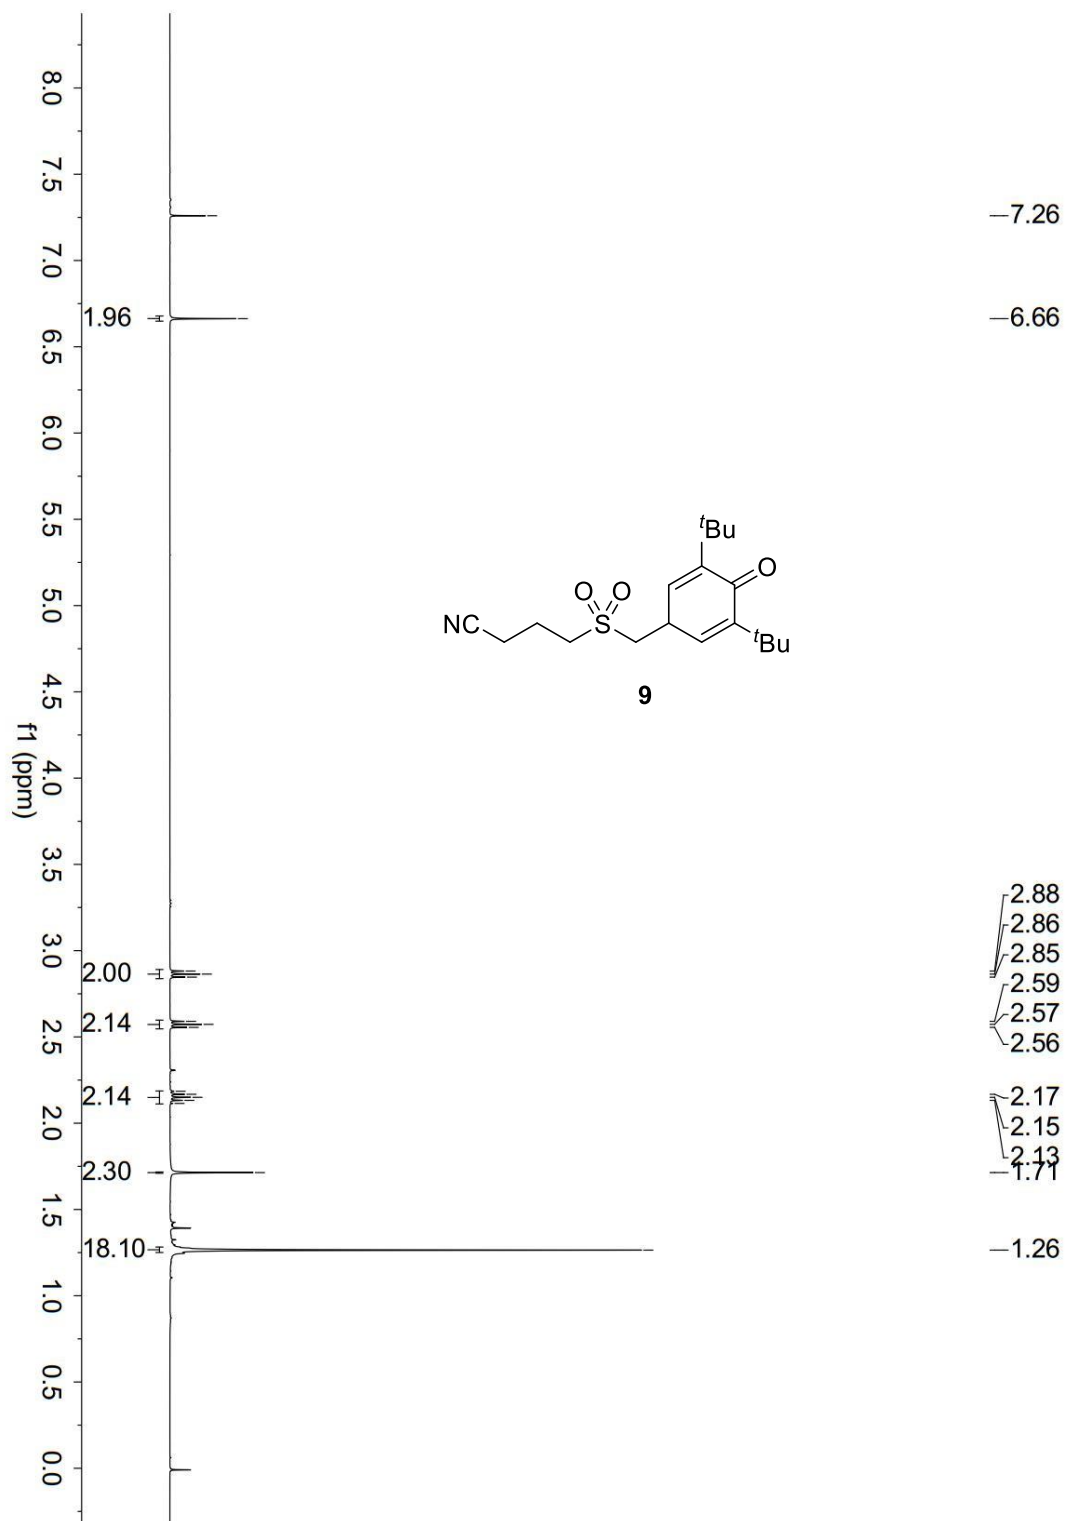

$^{13}\text{C}$  NMR spectrum of compound **9** (100 MHz,  $\text{CDCl}_3$ )

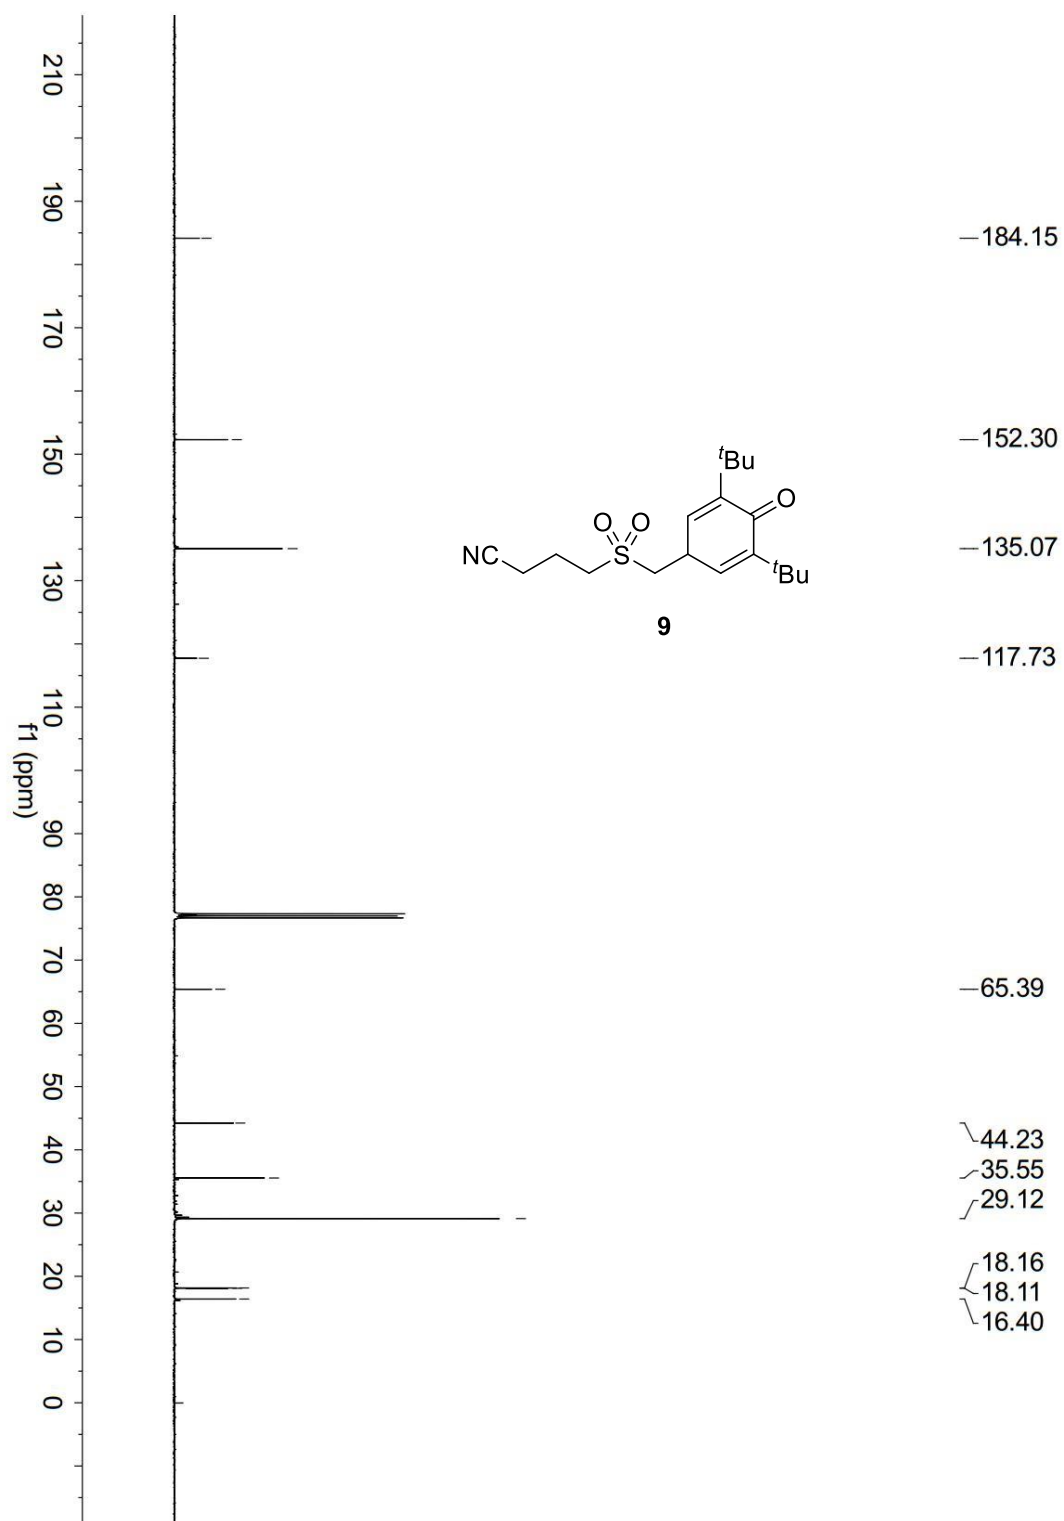

Supplement: d1cc05690e1.pdf [file d1cc05690e1.pdf]
